# Supplementary material
Source: publisher site journal article supplement (https://www.spandidos-publications.com/7155/downloadSupplementary)
Supplement: Supplementary file 1 [file downloadSupplementary]

## Sheet: Sheet1
Table SII. GSVA analysis on GO terms based on the different genes between high- and low-risk groups.
id	logFC	AveExpr	t	P.Value	adj.P.Val	B
GOBP_POSITIVE_REGULATION_OF_DENDRITE_MORPHOGENESIS	-0.237855	-0.0273514	-13.3606	3.0x10^-35	2.0x10^-31	68.944
GOBP_POSITIVE_REGULATION_OF_DENDRITIC_SPINE_MORPHOGENESIS	-0.278684	-0.0180733	-13.272	7.4x10^-35	2.4x10^-31	68.0784
GOBP_REGULATION_OF_DENDRITIC_SPINE_DEVELOPMENT	-0.203909	-0.0165654	-12.176	3.3x10^-30	7.4x10^-27	57.6101
GOBP_POSITIVE_REGULATION_OF_DENDRITIC_SPINE_DEVELOPMENT	-0.208605	-0.0143221	-12.0989	6.9x10^-30	1.1x10^-26	56.892
GOBP_REGULATION_OF_DENDRITIC_SPINE_MORPHOGENESIS	-0.193285	-0.0159463	-11.9077	4.2x10^-29	5.7x10^-26	55.122
GOBP_DENDRITIC_SPINE_MORPHOGENESIS	-0.175873	-0.0158789	-11.7352	2.1x10^-28	2.4x10^-25	53.5384
GOBP_DENDRITIC_SPINE_DEVELOPMENT	-0.170322	-0.018164	-11.4117	4.3x10^-27	4.1x10^-24	50.6059
GOBP_POSITIVE_REGULATION_OF_GLUCOSE_METABOLIC_PROCESS	-0.145692	-0.0111182	-10.4852	1.7x10^-23	1.4x10^-20	42.4838
GOBP_DENDRITE_EXTENSION	-0.158376	-0.00953567	-10.117	4.2x10^-22	3.1x10^-19	39.3787
GOBP_REGULATION_OF_DENDRITE_DEVELOPMENT	-0.129246	-0.010043	-10.0111	1.0x10^-21	7.0x10^-19	38.499
GOBP_REGULATION_OF_DENDRITE_MORPHOGENESIS	-0.145671	-0.0106803	-10.0009	1.1x10^-21	7.0x10^-19	38.415
GOBP_NEURON_PROJECTION_ORGANIZATION	-0.137204	-0.0129812	-9.60889	3.0x10^-20	1.7x10^-17	35.217
GOBP_REGULATION_OF_LONG_TERM_NEURONAL_SYNAPTIC_PLASTICITY	-0.164907	-0.0148931	-9.16468	1.1x10^-18	5.8x10^-16	31.7013
GOBP_POSITIVE_REGULATION_OF_MHC_CLASS_II_BIOSYNTHETIC_PROCESS	0.280741	0.0112002	9.11305	1.7x10^-18	8.1x10^-16	31.3004
GOBP_DISACCHARIDE_METABOLIC_PROCESS	0.234853	0.0459885	9.03136	3.2x10^-18	1.4x10^-15	30.6693
GOBP_PROTEIN_AUTOPROCESSING	0.170477	0.00110963	9.01899	3.5x10^-18	1.4x10^-15	30.5742
GOBP_REGULATION_OF_SKELETAL_MUSCLE_ADAPTATION	-0.209529	-0.0255185	-9.01371	3.7x10^-18	1.4x10^-15	30.5336
GOBP_REGULATION_OF_TOLL_LIKE_RECEPTOR_2_SIGNALING_PATHWAY	0.278205	0.0175208	8.89176	9.7x10^-18	3.6x10^-15	29.6006
GOBP_AMINE_CATABOLIC_PROCESS	0.188337	0.0173055	8.83307	1.5x10^-17	5.4x10^-15	29.1549
GOBP_REGULATION_OF_POSTSYNAPSE_ORGANIZATION	-0.126063	-0.0066762	-8.81868	1.7x10^-17	5.7x10^-15	29.046
GOBP_POSITIVE_REGULATION_OF_RUFFLE_ASSEMBLY	0.211419	0.005919	8.64128	6.7x10^-17	2.1x10^-14	27.7138
GOBP_REGULATION_OF_LONG_TERM_SYNAPTIC_POTENTIATION	-0.142584	-0.00386358	-8.46772	2.5x10^-16	7.6x10^-14	26.43
GOBP_DENDRITE_DEVELOPMENT	-0.107833	-0.0089277	-8.45825	2.7x10^-16	7.6x10^-14	26.3605
GOCC_INTRINSIC_COMPONENT_OF_SYNAPTIC_VESICLE_MEMBRANE	-0.128518	0.00377405	-8.45744	2.7x10^-16	7.6x10^-14	26.3546
GOBP_NUCLEOSIDE_DIPHOSPHATE_CATABOLIC_PROCESS	0.241503	0.0117144	8.44827	2.9x10^-16	7.8x10^-14	26.2874
GOMF_NUCLEOSIDE_DIPHOSPHATE_KINASE_ACTIVITY	0.222502	-0.00954438	8.28619	9.8x10^-16	2.5x10^-13	25.1083
GOBP_DENDRITE_MORPHOGENESIS	-0.115712	-0.00893289	-8.2049	1.8x10^-15	4.4x10^-13	24.5236
GOMF_OXIDOREDUCTASE_ACTIVITY_ACTING_ON_NAD_P_H_OXYGEN_AS_ACCEPTOR	0.219778	0.00467791	8.17887	2.1x10^-15	5.2x10^-13	24.3373
GOBP_PRE_MIRNA_PROCESSING	-0.233264	-0.0250859	-8.16118	2.4x10^-15	5.7x10^-13	24.211
GOCC_NEURON_PROJECTION_CYTOPLASM	-0.120733	-0.0215069	-8.1484	2.7x10^-15	6.1x10^-13	24.1198
GOBP_RNA_INTERFERENCE	-0.256935	-0.0396032	-8.13666	2.9x10^-15	6.4x10^-13	24.0362
GOMF_HISTONE_DEACETYLASE_ACTIVITY_H3_K14_SPECIFIC	-0.224858	-0.0358158	-8.12579	3.2x10^-15	6.5x10^-13	23.9589
GOBP_DEFENSE_RESPONSE_TO_TUMOR_CELL	0.239927	0.010627	8.12549	3.2x10^-15	6.5x10^-13	23.9567
GOCC_DENDRITE_CYTOPLASM	-0.131369	-0.0189346	-8.08406	4.3x10^-15	8.5x10^-13	23.6626
GOBP_SYNAPTIC_VESICLE_LOCALIZATION	-0.13379	-0.0164111	-8.08131	4.4x10^-15	8.5x10^-13	23.6431
GOBP_GAMMA_DELTA_T_CELL_ACTIVATION	0.210679	0.0113392	8.06152	5.1x10^-15	9.5x10^-13	23.5031
GOBP_NUCLEOTIDE_SUGAR_BIOSYNTHETIC_PROCESS	0.257865	0.00155835	8.03941	6.0x10^-15	1.1x10^-12	23.3469
GOBP_CELLULAR_RESPONSE_TO_OXIDISED_LOW_DENSITY_LIPOPROTEIN_PARTICLE_STIMULUS	0.216825	0.00160785	7.98155	9.2x10^-15	1.6x10^-12	22.9399
GOBP_SIGNAL_TRANSDUCTION_INVOLVED_IN_REGULATION_OF_GENE_EXPRESSION	0.167864	0.0075511	7.97696	9.5x10^-15	1.6x10^-12	22.9077
GOBP_MODIFICATION_OF_SYNAPTIC_STRUCTURE	-0.158158	-0.017885	-7.97577	9.6x10^-15	1.6x10^-12	22.8994
GOBP_ACTIVATION_OF_PHOSPHOLIPASE_C_ACTIVITY	0.193361	0.0128358	7.93936	1.2x10^-14	2.0x10^-12	22.6446
GOBP_REGULATION_OF_RUFFLE_ASSEMBLY	0.152734	-0.000781178	7.91192	1.5x10^-14	2.4x10^-12	22.4532
GOCC_GERM_CELL_NUCLEUS	-0.175073	-0.0063561	-7.87127	2.0x10^-14	3.1x10^-12	22.1706
GOBP_FIBROBLAST_ACTIVATION	0.184456	0.0185963	7.86494	2.1x10^-14	3.2x10^-12	22.1266
GOBP_POSITIVE_REGULATION_OF_INSULIN_SECRETION_INVOLVED_IN_CELLULAR_RESPONSE_TO_GLUCOSE_STIMULUS	0.134117	0.0258594	7.86215	2.1x10^-14	3.2x10^-12	22.1073
GOBP_REGULATION_OF_PHOSPHOLIPASE_C_ACTIVITY	0.169876	0.006393	7.83506	2.6x10^-14	3.7x10^-12	21.9197
GOMF_VOLTAGE_GATED_ANION_CHANNEL_ACTIVITY	-0.166677	-0.0179361	-7.83373	2.6x10^-14	3.7x10^-12	21.9106
GOBP_RESPONSE_TO_CAFFEINE	-0.186393	-0.0115477	-7.83329	2.6x10^-14	3.7x10^-12	21.9075
GOBP_RESPONSE_TO_MERCURY_ION	0.19868	0.0140228	7.78063	3.8x10^-14	5.2x10^-12	21.5445
GOBP_INTERLEUKIN_8_PRODUCTION	0.152002	0.0171179	7.77938	3.9x10^-14	5.2x10^-12	21.5358
GOBP_UTP_METABOLIC_PROCESS	0.201399	-0.00579637	7.77054	4.1x10^-14	5.4x10^-12	21.4751
GOBP_WALKING_BEHAVIOR	-0.121869	-0.00190662	-7.75306	4.7x10^-14	6.0x10^-12	21.3552
GOBP_ANDROGEN_METABOLIC_PROCESS	0.129544	0.00522553	7.74138	5.1x10^-14	6.4x10^-12	21.2751
GOBP_POSITIVE_REGULATION_OF_CELL_MORPHOGENESIS_INVOLVED_IN_DIFFERENTIATION	-0.10315	-0.0146035	-7.70689	6.5x10^-14	8.0x10^-12	21.0393
GOBP_REGULATION_OF_CELL_MORPHOGENESIS_INVOLVED_IN_DIFFERENTIATION	-0.105376	-0.0132773	-7.69169	7.2x10^-14	8.8x10^-12	20.9357
GOBP_SYNAPTIC_VESICLE_CLUSTERING	-0.204003	-0.00317962	-7.67511	8.1x10^-14	9.7x10^-12	20.8228
GOBP_CENTRAL_NERVOUS_SYSTEM_NEURON_AXONOGENESIS	-0.134014	-0.0139554	-7.65948	9.1x10^-14	1.0x10^-11	20.7166
GOBP_REGULATION_OF_AXONOGENESIS	-0.118007	-0.0120715	-7.65937	9.1x10^-14	1.0x10^-11	20.7158
GOBP_SKELETAL_MUSCLE_ADAPTATION	-0.150195	-0.00897626	-7.65831	9.1x10^-14	1.0x10^-11	20.7087
GOBP_HISTONE_H4_K5_ACETYLATION	-0.223623	-0.0341165	-7.63173	1.1x10^-13	1.2x10^-11	20.5284
GOBP_NEGATIVE_REGULATION_OF_INTERLEUKIN_8_PRODUCTION	0.164645	-0.00221684	7.59579	1.4x10^-13	1.5x10^-11	20.2855
GOBP_NEURON_PROJECTION_ARBORIZATION	-0.137613	-0.0110666	-7.56826	1.7x10^-13	1.8x10^-11	20.1001
GOBP_NEGATIVE_REGULATION_OF_RECEPTOR_BINDING	0.183958	0.00422509	7.55193	1.9x10^-13	2.0x10^-11	19.9903
GOBP_POSITIVE_REGULATION_OF_LIPASE_ACTIVITY	0.135671	0.00721808	7.50863	2.6x10^-13	2.7x10^-11	19.7003
GOBP_NEURON_PROJECTION_EXTENSION	-0.113538	-0.0121704	-7.50595	2.6x10^-13	2.7x10^-11	19.6824
GOBP_RESPONSE_TO_INTERLEUKIN_17	0.197565	0.0278373	7.48449	3.0x10^-13	3.1x10^-11	19.5391
GOBP_REGULATION_OF_RECEPTOR_BINDING	0.168152	0.00806717	7.46669	3.4x10^-13	3.4x10^-11	19.4206
GOBP_EPHRIN_RECEPTOR_SIGNALING_PATHWAY	-0.134808	-0.0117354	-7.46514	3.5x10^-13	3.4x10^-11	19.4102
GOBP_LOW_DENSITY_LIPOPROTEIN_PARTICLE_CLEARANCE	0.146084	0.0171639	7.46328	3.5x10^-13	3.4x10^-11	19.3979
GOBP_LAYER_FORMATION_IN_CEREBRAL_CORTEX	-0.190623	-0.0100791	-7.43542	4.2x10^-13	4.1x10^-11	19.2129
GOBP_TOLL_LIKE_RECEPTOR_2_SIGNALING_PATHWAY	0.222963	0.00742007	7.4296	4.4x10^-13	4.2x10^-11	19.1742
GOMF_CYSTEINE_TYPE_ENDOPEPTIDASE_REGULATOR_ACTIVITY_INVOLVED_IN_APOPTOTIC_PROCESS	0.13501	0.00275336	7.40356	5.3x10^-13	4.9x10^-11	19.0019
GOBP_RESPONSE_TO_L_GLUTAMATE	-0.18155	-0.0304804	-7.39356	5.7x10^-13	5.1x10^-11	18.9359
GOBP_BRANCHING_INVOLVED_IN_MAMMARY_GLAND_DUCT_MORPHOGENESIS	0.15998	0.0158828	7.3716	6.6x10^-13	5.9x10^-11	18.7911
GOCC_PRESYNAPTIC_ACTIVE_ZONE	-0.103917	-0.0105642	-7.34263	8.0x10^-13	7.0x10^-11	18.6006
GOBP_SMALL_RNA_LOADING_ONTO_RISC	-0.256242	-0.0332036	-7.34147	8.1x10^-13	7.0x10^-11	18.593
GOMF_HYDROLASE_ACTIVITY_ACTING_ON_GLYCOSYL_BONDS	0.102438	0.00264417	7.33708	8.3x10^-13	7.1x10^-11	18.5642
GOBP_POSITIVE_REGULATION_OF_B_CELL_DIFFERENTIATION	0.207494	0.0122004	7.33246	8.6x10^-13	7.3x10^-11	18.5339
GOBP_RUFFLE_ORGANIZATION	0.133432	-0.00605161	7.32805	8.9x10^-13	7.4x10^-11	18.505
GOBP_NEGATIVE_REGULATION_OF_DOUBLE_STRAND_BREAK_REPAIR_VIA_HOMOLOGOUS_RECOMBINATION	-0.23829	-0.0322255	-7.32423	9.1x10^-13	7.4x10^-11	18.48
GOBP_REGULATION_OF_INSULIN_SECRETION_INVOLVED_IN_CELLULAR_RESPONSE_TO_GLUCOSE_STIMULUS	0.102838	0.0125519	7.3238	9.1x10^-13	7.4x10^-11	18.4771
GOCC_INTEGRAL_COMPONENT_OF_SYNAPTIC_VESICLE_MEMBRANE	-0.124723	0.017531	-7.3196	9.4x10^-13	7.6x10^-11	18.4497
GOMF_CYCLIN_DEPENDENT_PROTEIN_SERINE_THREONINE_KINASE_ACTIVATOR_ACTIVITY	-0.214504	-0.0146206	-7.31618	9.6x10^-13	7.6x10^-11	18.4273
GOBP_GLYCEROL_ETHER_METABOLIC_PROCESS	0.147829	-0.00223215	7.29966	1.0x10^-12	8.5x10^-11	18.3193
GOBP_NEGATIVE_REGULATION_OF_ACTIVIN_RECEPTOR_SIGNALING_PATHWAY	-0.16681	-0.0149125	-7.28157	1.2x10^-12	9.3x10^-11	18.2011
GOBP_POSITIVE_REGULATION_OF_T_CELL_DIFFERENTIATION_IN_THYMUS	0.239295	0.0189108	7.27985	1.2x10^-12	9.3x10^-11	18.1899
GOBP_REGULATION_OF_GAMMA_DELTA_T_CELL_ACTIVATION	0.225104	0.0239633	7.26311	1.3x10^-12	1.0x10^-10	18.0809
GOMF_SIRNA_BINDING	-0.199367	-0.0291437	-7.23105	1.7x10^-12	1.2x10^-10	17.8727
GOBP_SECRETORY_GRANULE_LOCALIZATION	-0.175497	-0.00848073	-7.21412	1.9x10^-12	1.4x10^-10	17.7631
GOBP_REGULATION_OF_HUMORAL_IMMUNE_RESPONSE_MEDIATED_BY_CIRCULATING_IMMUNOGLOBULIN	0.223438	0.00954259	7.20528	2.0x10^-12	1.4x10^-10	17.7059
GOBP_REGULATION_OF_PROSTAGLANDIN_SECRETION	0.197717	0.0139783	7.17536	2.4x10^-12	1.7x10^-10	17.5128
GOBP_CHEMOKINE_C_X_C_MOTIF_LIGAND_2_PRODUCTION	0.166561	0.00436913	7.16262	2.7x10^-12	1.9x10^-10	17.4308
GOBP_GENOMIC_IMPRINTING	-0.17033	-0.00687968	-7.15509	2.8x10^-12	1.9x10^-10	17.3823
GOBP_TUBULIN_DEACETYLATION	-0.161957	-0.0269723	-7.12042	3.5x10^-12	2.4x10^-10	17.1599
GOBP_POSITIVE_REGULATION_OF_REACTIVE_OXYGEN_SPECIES_BIOSYNTHETIC_PROCESS	0.163774	0.0003694	7.11745	3.6x10^-12	2.4x10^-10	17.1409
GOBP_PROTEIN_DNA_COMPLEX_DISASSEMBLY	-0.204468	-0.0178381	-7.11087	3.8x10^-12	2.5x10^-10	17.0988
GOBP_CHROMATIN_DISASSEMBLY	-0.194999	-0.0178301	-7.08252	4.5x10^-12	2.9x10^-10	16.9179
GOBP_DEVELOPMENTAL_CELL_GROWTH	-0.102932	-0.00931509	-7.07617	4.7x10^-12	3.0x10^-10	16.8774
GOCC_COHESIN_COMPLEX	-0.200573	-0.0232371	-7.07572	4.8x10^-12	3.0x10^-10	16.8745
GOBP_POSITIVE_REGULATION_OF_PHOSPHOLIPASE_ACTIVITY	0.136633	0.00169913	7.06882	5.0x10^-12	3.1x10^-10	16.8306
GOBP_PYRIMIDINE_RIBONUCLEOTIDE_METABOLIC_PROCESS	0.11014	-0.00791513	7.05613	5.4x10^-12	3.3x10^-10	16.7499
GOBP_HISTONE_H3_K27_METHYLATION	-0.195991	-0.0325617	-7.03535	6.2x10^-12	3.8x10^-10	16.618
GOMF_VOLTAGE_GATED_CHLORIDE_CHANNEL_ACTIVITY	-0.176692	-0.0219033	-7.02232	6.8x10^-12	4.0x10^-10	16.5355
GOBP_XENOBIOTIC_EXPORT	0.180744	0.0175044	7.02226	6.8x10^-12	4.0x10^-10	16.5351
GOBP_REGULATION_OF_ICOSANOID_SECRETION	0.170294	0.0241523	7.01363	7.2x10^-12	4.2x10^-10	16.4805
GOBP_NEGATIVE_REGULATION_OF_DNA_RECOMBINATION	-0.173226	-0.029023	-7.00989	7.3x10^-12	4.2x10^-10	16.4569
GOBP_GAMMA_DELTA_T_CELL_DIFFERENTIATION	0.192398	0.0169099	7.00891	7.4x10^-12	4.2x10^-10	16.4507
GOCC_MALE_GERM_CELL_NUCLEUS	-0.158959	-0.00282754	-7.00647	7.5x10^-12	4.3x10^-10	16.4353
GOCC_NSL_COMPLEX	-0.224737	-0.0274417	-6.98715	8.5x10^-12	4.8x10^-10	16.3134
GOBP_MHC_CLASS_II_BIOSYNTHETIC_PROCESS	0.175646	0.0032126	6.98065	8.9x10^-12	5.0x10^-10	16.2724
GOBP_REGULATION_OF_NUCLEOTIDE_BINDING_OLIGOMERIZATION_DOMAIN_CONTAINING_SIGNALING_PATHWAY	0.223582	0.0205031	6.97447	9.3x10^-12	5.1x10^-10	16.2335
GOBP_DETECTION_OF_MOLECULE_OF_BACTERIAL_ORIGIN	0.239419	0.0173552	6.95236	1.0x10^-11	5.9x10^-10	16.0945
GOBP_SYNAPTIC_VESICLE_PRIMING	-0.147591	-0.0154214	-6.94749	1.1x10^-11	6.0x10^-10	16.0639
GOBP_REGULATION_OF_DENDRITE_EXTENSION	-0.133753	0.000658082	-6.94199	1.1x10^-11	6.2x10^-10	16.0294
GOBP_REGULATION_OF_LOW_DENSITY_LIPOPROTEIN_PARTICLE_CLEARANCE	0.151301	0.0256207	6.91994	1.3x10^-11	7.1x10^-10	15.8914
GOBP_MAMMARY_GLAND_DUCT_MORPHOGENESIS	0.147147	0.0181289	6.90658	1.4x10^-11	7.7x10^-10	15.8079
GOBP_REGULATION_OF_NUCLEOBASE_CONTAINING_COMPOUND_TRANSPORT	-0.229098	-0.0308702	-6.90409	1.4x10^-11	7.8x10^-10	15.7924
GOBP_T_CELL_ACTIVATION_INVOLVED_IN_IMMUNE_RESPONSE	0.157893	0.0194991	6.8992	1.5x10^-11	7.9x10^-10	15.7619
GOBP_REGULATION_OF_ACTIVIN_RECEPTOR_SIGNALING_PATHWAY	-0.139372	-0.0126016	-6.89319	1.5x10^-11	8.2x10^-10	15.7244
GOCC_NBAF_COMPLEX	-0.180712	-0.020315	-6.89201	1.5x10^-11	8.2x10^-10	15.7171
GOBP_MAMMARY_GLAND_EPITHELIUM_DEVELOPMENT	0.116153	0.00292811	6.8761	1.7x10^-11	9.0x10^-10	15.618
GOBP_REGULATION_OF_ACTIN_CYTOSKELETON_REORGANIZATION	0.140699	-0.00357593	6.86816	1.8x10^-11	9.4x10^-10	15.5686
GOBP_SNARE_COMPLEX_ASSEMBLY	-0.146124	-0.0311542	-6.86032	1.9x10^-11	9.7x10^-10	15.5199
GOBP_REGULATION_OF_EXTENT_OF_CELL_GROWTH	-0.111747	-0.012597	-6.85961	1.9x10^-11	9.7x10^-10	15.5155
GOBP_POSITIVE_REGULATION_OF_CYTOPLASMIC_TRANSLATION	-0.200743	-0.00968386	-6.8596	1.9x10^-11	9.7x10^-10	15.5155
GOMF_REGULATORY_RNA_BINDING	-0.141847	-0.0210868	-6.8568	1.9x10^-11	9.8x10^-10	15.4981
GOBP_FLOOR_PLATE_DEVELOPMENT	0.181355	-0.00520509	6.8363	2.2x10^-11	1.1x10^-9	15.371
GOBP_MATERNAL_PROCESS_INVOLVED_IN_FEMALE_PREGNANCY	0.107645	-0.000207129	6.82983	2.3x10^-11	1.1x10^-9	15.331
GOBP_NUCLEOTIDE_BINDING_OLIGOMERIZATION_DOMAIN_CONTAINING_2_SIGNALING_PATHWAY	0.202563	0.00313672	6.82583	2.4x10^-11	1.1x10^-9	15.3063
GOBP_RESPONSE_TO_TUMOR_CELL	0.15094	0.000543384	6.80882	2.7x10^-11	1.2x10^-9	15.2012
GOBP_STRIATED_MUSCLE_ADAPTATION	-0.100047	-0.00197319	-6.78673	3.1x10^-11	1.4x10^-9	15.0651
GOBP_REGULATION_OF_LIPASE_ACTIVITY	0.113261	0.00706742	6.78395	3.1x10^-11	1.4x10^-9	15.048
GOMF_OXIDOREDUCTASE_ACTIVITY_ACTING_ON_CH_OH_GROUP_OF_DONORS	0.104723	-0.00387149	6.76503	3.5x10^-11	1.6x10^-9	14.9318
GOBP_CELLULAR_RESPONSE_TO_CAFFEINE	-0.178582	-0.00453783	-6.75995	3.7x10^-11	1.6x10^-9	14.9006
GOBP_POSITIVE_REGULATION_OF_CELL_ADHESION_MEDIATED_BY_INTEGRIN	0.16794	0.00596803	6.75938	3.7x10^-11	1.6x10^-9	14.8972
GOBP_ACTIN_CROSSLINK_FORMATION	0.143736	-0.00683484	6.75731	3.7x10^-11	1.6x10^-9	14.8844
GOBP_POSITIVE_REGULATION_OF_FATTY_ACID_TRANSPORT	0.159962	0.0190014	6.75464	3.8x10^-11	1.7x10^-9	14.8681
GOBP_POSITIVE_REGULATION_OF_CHEMOKINE_PRODUCTION	0.150346	0.0131845	6.74421	4.0x10^-11	1.8x10^-9	14.8042
GOBP_GANGLIOSIDE_BIOSYNTHETIC_PROCESS	-0.163566	-0.0114721	-6.69903	5.4x10^-11	2.3x10^-9	14.5284
GOMF_HYDROLASE_ACTIVITY_HYDROLYZING_N_GLYCOSYL_COMPOUNDS	0.110502	-0.00890283	6.6796	6.1x10^-11	2.6x10^-9	14.4104
GOMF_NADPLUS_NUCLEOSIDASE_ACTIVITY	0.182865	0.0110129	6.6615	6.8x10^-11	2.9x10^-9	14.3006
GOBP_MAINTENANCE_OF_GASTROINTESTINAL_EPITHELIUM	0.176691	0.0178255	6.65899	6.9x10^-11	3.0x10^-9	14.2854
GOBP_REGULATION_OF_STEM_CELL_POPULATION_MAINTENANCE	-0.1344	-0.0144358	-6.65656	7.1x10^-11	3.0x10^-9	14.2707
GOCC_HETEROCHROMATIN	-0.157487	-0.0274398	-6.65462	7.1x10^-11	3.0x10^-9	14.259
GOBP_EXTRACELLULAR_TRANSPORT	0.205851	-0.0126745	6.65284	7.2x10^-11	3.0x10^-9	14.2482
GOBP_CELLULAR_RESPONSE_TO_X_RAY	-0.136251	-0.0185157	-6.6506	7.3x10^-11	3.1x10^-9	14.2347
GOBP_REGULATION_OF_NEURON_MIGRATION	-0.112865	-0.00456054	-6.64822	7.4x10^-11	3.1x10^-9	14.2203
GOBP_INTERLEUKIN_5_PRODUCTION	0.147484	0.026758	6.64357	7.7x10^-11	3.1x10^-9	14.1921
GOBP_REGULATION_OF_CHROMATIN_BINDING	-0.155867	-0.0191924	-6.64345	7.7x10^-11	3.1x10^-9	14.1914
GOBP_EPITHELIAL_FLUID_TRANSPORT	0.193363	0.0176058	6.63565	8.0x10^-11	3.3x10^-9	14.1443
GOBP_ETHER_BIOSYNTHETIC_PROCESS	0.17412	0.0013514	6.63149	8.3x10^-11	3.3x10^-9	14.1192
GOBP_CELLULAR_RESPONSE_TO_ALDEHYDE	0.168632	0.00526878	6.6245	8.6x10^-11	3.5x10^-9	14.077
GOBP_POSITIVE_REGULATION_OF_PROTEIN_IMPORT	-0.113787	-0.0205304	-6.60765	9.6x10^-11	3.8x10^-9	13.9756
GOMF_TUMOR_NECROSIS_FACTOR_RECEPTOR_BINDING	0.161149	-0.00371945	6.60735	9.6x10^-11	3.8x10^-9	13.9737
GOBP_POSITIVE_REGULATION_OF_CYTOKINE_PRODUCTION_INVOLVED_IN_INFLAMMATORY_RESPONSE	0.166531	0.0146184	6.59936	1.0x10^-10	4.0x10^-9	13.9257
GOBP_POSITIVE_REGULATION_BY_SYMBIONT_OF_ENTRY_INTO_HOST	0.209467	0.00401099	6.58085	1.1x10^-10	4.4x10^-9	13.8146
GOMF_SUPEROXIDE_GENERATING_NAD_P_H_OXIDASE_ACTIVITY	0.205422	0.0124074	6.56863	1.2x10^-10	4.8x10^-9	13.7414
GOBP_POLYAMINE_BIOSYNTHETIC_PROCESS	0.164516	-0.0118204	6.55988	1.3x10^-10	5.0x10^-9	13.6891
GOBP_POSITIVE_REGULATION_OF_GLYCOGEN_METABOLIC_PROCESS	-0.15386	-0.00130739	-6.55877	1.3x10^-10	5.0x10^-9	13.6824
GOMF_PEPTIDASE_ACTIVATOR_ACTIVITY_INVOLVED_IN_APOPTOTIC_PROCESS	0.139718	0.00631187	6.55265	1.3x10^-10	5.1x10^-9	13.6458
GOCC_NADPH_OXIDASE_COMPLEX	0.206741	0.0218948	6.55206	1.3x10^-10	5.1x10^-9	13.6423
GOBP_REGULATION_OF_DOUBLE_STRAND_BREAK_REPAIR	-0.149049	-0.0242518	-6.54531	1.4x10^-10	5.3x10^-9	13.602
GOBP_FOLIC_ACID_TRANSPORT	-0.153463	-0.0109067	-6.54059	1.4x10^-10	5.4x10^-9	13.5739
GOBP_HISTONE_H4_ACETYLATION	-0.149898	-0.0205375	-6.53492	1.5x10^-10	5.6x10^-9	13.54
GOCC_PRONUCLEUS	-0.229524	-0.0162607	-6.52806	1.5x10^-10	5.8x10^-9	13.4992
GOBP_REGULATION_OF_LONG_TERM_SYNAPTIC_DEPRESSION	-0.15563	0.00690555	-6.5271	1.5x10^-10	5.8x10^-9	13.4935
GOMF_EPHRIN_RECEPTOR_ACTIVITY	-0.160294	-0.00032791	-6.52123	1.6x10^-10	6.0x10^-9	13.4585
GOBP_POSITIVE_REGULATION_OF_T_HELPER_CELL_DIFFERENTIATION	0.16997	0.00114507	6.51481	1.7x10^-10	6.2x10^-9	13.4204
GOBP_POSITIVE_REGULATION_OF_RHO_PROTEIN_SIGNAL_TRANSDUCTION	0.142511	-0.000750582	6.51389	1.7x10^-10	6.2x10^-9	13.4149
GOBP_GLUTAMINE_METABOLIC_PROCESS	-0.147627	-0.0186396	-6.51343	1.7x10^-10	6.2x10^-9	13.4122
GOBP_MAINTENANCE_OF_SYNAPSE_STRUCTURE	-0.132495	-0.0141006	-6.5099	1.7x10^-10	6.3x10^-9	13.3912
GOBP_REGULATION_OF_GLYCOGEN_METABOLIC_PROCESS	-0.104488	-0.00142834	-6.50552	1.8x10^-10	6.4x10^-9	13.3651
GOCC_H4_HISTONE_ACETYLTRANSFERASE_COMPLEX	-0.1805	-0.0183954	-6.50439	1.8x10^-10	6.5x10^-9	13.3584
GOBP_CELLULAR_RESPONSE_TO_EXOGENOUS_DSRNA	-0.166722	-0.0181477	-6.49584	1.9x10^-10	6.8x10^-9	13.3077
GOMF_HISTONE_METHYLTRANSFERASE_BINDING	-0.200821	-0.0182297	-6.46299	2.3x10^-10	8.2x10^-9	13.1133
GOBP_NEGATIVE_REGULATION_OF_DNA_REPAIR	-0.176171	-0.0326175	-6.45219	2.5x10^-10	8.7x10^-9	13.0496
GOBP_ETHER_METABOLIC_PROCESS	0.114106	-0.00413143	6.45188	2.5x10^-10	8.7x10^-9	13.0478
GOMF_TAU_PROTEIN_BINDING	-0.126511	-0.0244391	-6.45008	2.5x10^-10	8.8x10^-9	13.0372
GOMF_HYDROLASE_ACTIVITY_HYDROLYZING_O_GLYCOSYL_COMPOUNDS	0.102196	0.00725441	6.44855	2.5x10^-10	8.8x10^-9	13.0282
GOBP_HISTONE_H4_K16_ACETYLATION	-0.187647	-0.0219533	-6.44411	2.6x10^-10	9.0x10^-9	13.002
GOMF_LIPOPEPTIDE_BINDING	0.271317	0.0155856	6.42949	2.8x10^-10	9.8x10^-9	12.916
GOBP_POSITIVE_REGULATION_OF_ALPHA_BETA_T_CELL_DIFFERENTIATION	0.153934	-0.000771691	6.42767	2.9x10^-10	9.8x10^-9	12.9053
GOBP_FEMALE_MEIOTIC_NUCLEAR_DIVISION	-0.184266	-0.0354474	-6.4261	2.9x10^-10	9.8x10^-9	12.8961
GOCC_T_CELL_RECEPTOR_COMPLEX	0.278033	0.0104314	6.42272	3.0x10^-10	1e-08	12.8762
GOBP_PHENOL_CONTAINING_COMPOUND_CATABOLIC_PROCESS	0.203774	0.0202587	6.41618	3.1x10^-10	1.0x10^-8	12.8378
GOBP_PANCREATIC_JUICE_SECRETION	0.169811	0.00315917	6.40326	3.3x10^-10	1.1x10^-8	12.7621
GOBP_POSITIVE_REGULATION_OF_BROWN_FAT_CELL_DIFFERENTIATION	-0.134351	-0.00660328	-6.39459	3.5x10^-10	1.1x10^-8	12.7113
GOBP_ORGANIC_HYDROXY_COMPOUND_CATABOLIC_PROCESS	0.101213	0.0038706	6.39054	3.6x10^-10	1.1x10^-8	12.6877
GOBP_REGULATION_OF_POSTSYNAPTIC_NEUROTRANSMITTER_RECEPTOR_ACTIVITY	-0.151098	0.00249858	-6.38018	3.9x10^-10	1.2x10^-8	12.6271
GOBP_RESPONSE_TO_INACTIVITY	-0.145994	-0.00140144	-6.37398	4.0x10^-10	1.3e-08	12.5909
GOBP_REGULATION_OF_OSTEOCLAST_DEVELOPMENT	0.17997	0.00434818	6.36956	4.1x10^-10	1.3x10^-8	12.5651
GOBP_REGULATION_OF_CLATHRIN_DEPENDENT_ENDOCYTOSIS	-0.150323	-0.0255189	-6.36917	4.1x10^-10	1.3x10^-8	12.5628
GOBP_NEGATIVE_REGULATION_OF_DENDRITIC_SPINE_DEVELOPMENT	-0.1439	-0.02027	-6.35291	4.6x10^-10	1.4x10^-8	12.4681
GOMF_TUMOR_NECROSIS_FACTOR_RECEPTOR_SUPERFAMILY_BINDING	0.123713	-0.00494152	6.35105	4.6x10^-10	1.4x10^-8	12.4573
GOBP_MRNA_METHYLATION	-0.211935	-0.0177996	-6.34871	4.7x10^-10	1.4x10^-8	12.4437
GOCC_MICROBODY_LUMEN	0.125875	0.00719282	6.34734	4.7x10^-10	1.4x10^-8	12.4357
GOBP_ACTIVIN_RECEPTOR_SIGNALING_PATHWAY	-0.10983	0.00151737	-6.34593	4.7x10^-10	1.4x10^-8	12.4276
GOBP_ALPHA_BETA_T_CELL_DIFFERENTIATION	0.145264	-0.000380477	6.333	5.1x10^-10	1.5x10^-8	12.3525
GOBP_POSITIVE_REGULATION_OF_INTERLEUKIN_8_PRODUCTION	0.128159	0.0147161	6.33297	5.1x10^-10	1.5x10^-8	12.3523
GOBP_NEGATIVE_REGULATION_OF_TRANSCRIPTION_BY_COMPETITIVE_PROMOTER_BINDING	-0.157729	-0.0241191	-6.33002	5.2x10^-10	1.6x10^-8	12.3352
GOMF_GLYCINE_BINDING	0.150676	0.0254087	6.3263	5.4x10^-10	1.6x10^-8	12.3136
GOBP_REGULATION_OF_GRANULOCYTE_DIFFERENTIATION	0.155485	0.0151791	6.31428	5.8x10^-10	1.7x10^-8	12.244
GOBP_DETOXIFICATION	0.102245	0.00594697	6.31131	5.9x10^-10	1.7x10^-8	12.2268
GOBP_FRUCTOSE_METABOLIC_PROCESS	0.162427	-0.00438489	6.28996	6.7x10^-10	1.9x10^-8	12.1034
GOBP_CHEMOKINE_PRODUCTION	0.130296	0.00954551	6.2878	6.8x10^-10	1.9x10^-8	12.091
GOBP_MITOCHONDRION_MORPHOGENESIS	-0.152477	-0.0303341	-6.28718	6.8x10^-10	1.9x10^-8	12.0874
GOMF_MIRNA_BINDING	-0.156186	-0.0201504	-6.2827	7.0x10^-10	2.0x10^-8	12.0616
GOBP_POSITIVE_REGULATION_OF_DOUBLE_STRAND_BREAK_REPAIR	-0.143067	-0.0225405	-6.27147	7.5x10^-10	2.1x10^-8	11.9969
GOBP_RUFFLE_ASSEMBLY	0.104091	-0.00958396	6.25879	8.0x10^-10	2.3x10^-8	11.924
GOBP_CEREBRAL_CORTEX_RADIALLY_ORIENTED_CELL_MIGRATION	-0.122559	-0.013124	-6.25786	8.1x10^-10	2.3x10^-8	11.9186
GOBP_SOMATIC_DIVERSIFICATION_OF_IMMUNE_RECEPTORS_VIA_SOMATIC_MUTATION	-0.175753	-0.0349265	-6.25536	8.2x10^-10	2.3x10^-8	11.9043
GOMF_ALDEHYDE_DEHYDROGENASE_NAD_P_PLUS_ACTIVITY	0.156328	0.00715897	6.23783	9.1x10^-10	2.6x10^-8	11.8037
GOBP_T_HELPER_1_TYPE_IMMUNE_RESPONSE	0.163895	0.00587056	6.23603	9.2x10^-10	2.6x10^-8	11.7934
GOMF_MRNA_METHYLTRANSFERASE_ACTIVITY	-0.211351	-0.0232192	-6.23587	9.2x10^-10	2.6x10^-8	11.7925
GOBP_REGULATION_OF_VITAMIN_METABOLIC_PROCESS	0.14479	-0.00625104	6.2321	9.4x10^-10	2.6x10^-8	11.771
GOMF_ACTIVIN_BINDING	-0.159396	-0.0158462	-6.23037	9.5x10^-10	2.6x10^-8	11.7611
GOMF_AP_2_ADAPTOR_COMPLEX_BINDING	-0.175862	-0.0180141	-6.22809	9.7x10^-10	2.6x10^-8	11.748
GOBP_TONGUE_DEVELOPMENT	-0.130193	0.000627143	-6.22781	9.7x10^-10	2.6x10^-8	11.7464
GOBP_REGULATION_OF_HEMATOPOIETIC_STEM_CELL_DIFFERENTIATION	-0.156379	-0.0227624	-6.22751	9.7x10^-10	2.6x10^-8	11.7447
GOCC_ENDORIBONUCLEASE_COMPLEX	-0.170448	-0.0382406	-6.21531	1.0x10^-9	2.8x10^-8	11.675
GOMF_EPHRIN_RECEPTOR_BINDING	-0.127233	-0.0171787	-6.21401	1.0x10^-9	2.8x10^-8	11.6676
GOBP_TELENCEPHALON_GLIAL_CELL_MIGRATION	-0.132845	-0.0131961	-6.20407	1.1x10^-9	3.0x10^-8	11.6108
GOBP_POSITIVE_REGULATION_OF_FATTY_ACID_OXIDATION	-0.146372	-0.00562746	-6.19409	1.1x10^-9	3.2x10^-8	11.554
GOBP_REGULATION_OF_NEURON_PROJECTION_ARBORIZATION	-0.138128	-0.0175633	-6.19186	1.2x10^-9	3.2x10^-8	11.5413
GOMF_TAU_PROTEIN_KINASE_ACTIVITY	-0.138339	-0.0303317	-6.18435	1.2x10^-9	3.3x10^-8	11.4985
GOBP_REGULATION_OF_PHOSPHOLIPASE_ACTIVITY	0.114541	0.00112736	6.16902	1.3x10^-9	3.6x10^-8	11.4115
GOMF_AMINO_ACID_CATION_SYMPORTER_ACTIVITY	-0.131684	0.0121967	-6.16866	1.3x10^-9	3.6x10^-8	11.4095
GOCC_POSTSYNAPTIC_CYTOSOL	-0.19263	-0.0265523	-6.16509	1.4x10^-9	3.7x10^-8	11.3892
GOCC_CATALYTIC_STEP_1_SPLICEOSOME	-0.202151	-0.028574	-6.15291	1.5x10^-9	3.9x10^-8	11.3202
GOBP_T_CELL_MEDIATED_CYTOTOXICITY	0.180012	0.00197957	6.14693	1.5x10^-9	4.1x10^-8	11.2864
GOMF_NOTCH_BINDING	-0.156214	-0.012654	-6.14318	1.6x10^-9	4.1x10^-8	11.2652
GOBP_REGULATION_OF_RNA_EXPORT_FROM_NUCLEUS	-0.215339	-0.0237899	-6.1396	1.6x10^-9	4.2x10^-8	11.245
GOBP_T_HELPER_2_CELL_DIFFERENTIATION	0.174102	0.00548638	6.13731	1.6x10^-9	4.2x10^-8	11.232
GOBP_GLUTATHIONE_METABOLIC_PROCESS	0.113446	-0.0095417	6.13252	1.7x10^-9	4.3x10^-8	11.205
GOBP_REGULATION_OF_DOUBLE_STRAND_BREAK_REPAIR_VIA_HOMOLOGOUS_RECOMBINATION	-0.155221	-0.0222753	-6.13015	1.7x10^-9	4.4x10^-8	11.1915
GOBP_T_CELL_DIFFERENTIATION_INVOLVED_IN_IMMUNE_RESPONSE	0.145915	0.000464266	6.12403	1.7x10^-9	4.5x10^-8	11.1571
GOBP_TONGUE_MORPHOGENESIS	-0.153149	-0.00416494	-6.11925	1.8x10^-9	4.6x10^-8	11.1301
GOBP_AXONAL_TRANSPORT	-0.103662	-0.0212985	-6.11683	1.8x10^-9	4.7x10^-8	11.1165
GOBP_DENDRITIC_CELL_ANTIGEN_PROCESSING_AND_PRESENTATION	0.226608	0.00722306	6.11601	1.8x10^-9	4.7x10^-8	11.1118
GOBP_ALPHA_BETA_T_CELL_ACTIVATION	0.147765	2.69e-05	6.10599	1.9x10^-9	5.0x10^-8	11.0555
GOBP_REGULATION_OF_GLUCAN_BIOSYNTHETIC_PROCESS	-0.107047	0.00194231	-6.10013	2.0x10^-9	5.1x10^-8	11.0225
GOBP_NUCLEOSIDE_MONOPHOSPHATE_CATABOLIC_PROCESS	0.125284	6.48e-05	6.09784	2.0x10^-9	5.2x10^-8	11.0096
GOBP_HISTONE_H2A_ACETYLATION	-0.174348	-0.0168915	-6.09368	2.1x10^-9	5.3x10^-8	10.9863
GOBP_POSITIVE_REGULATION_OF_INTERFERON_GAMMA_PRODUCTION	0.168744	0.00261022	6.09336	2.1x10^-9	5.3x10^-8	10.9845
GOBP_DENDRITIC_TRANSPORT	-0.159957	-0.0231411	-6.09226	2.1x10^-9	5.3x10^-8	10.9783
GOBP_AXO_DENDRITIC_TRANSPORT	-0.103794	-0.0210702	-6.09136	2.1x10^-9	5.3x10^-8	10.9733
GOMF_RETINAL_BINDING	-0.159616	0.0227608	-6.0909	2.1x10^-9	5.3x10^-8	10.9707
GOBP_REGULATION_OF_TRANSCRIPTION_BY_RNA_POLYMERASE_III	-0.155613	-0.0278059	-6.07844	2.3x10^-9	5.6x10^-8	10.9008
GOBP_NUCLEOTIDE_BINDING_DOMAIN_LEUCINE_RICH_REPEAT_CONTAINING_RECEPTOR_SIGNALING_PATHWAY	0.163537	0.00385327	6.07843	2.3x10^-9	5.6x10^-8	10.9008
GOBP_EPITHELIAL_STRUCTURE_MAINTENANCE	0.123711	0.0122401	6.077	2.3x10^-9	5.6x10^-8	10.8928
GOBP_PRESYNAPSE_ORGANIZATION	-0.110985	0.00866276	-6.06857	2.4x10^-9	5.9x10^-8	10.8456
GOBP_REGULATION_OF_INTRINSIC_APOPTOTIC_SIGNALING_PATHWAY_BY_P53_CLASS_MEDIATOR	0.124767	-0.0122306	6.06831	2.4x10^-9	5.9x10^-8	10.8442
GOBP_STORE_OPERATED_CALCIUM_ENTRY	0.124311	0.00185061	6.06043	2.6x10^-9	6.1x10^-8	10.8001
GOBP_PEPTIDYL_LYSINE_ACETYLATION	-0.12033	-0.019355	-6.05132	2.7x10^-9	6.5e-08	10.7492
GOBP_CELL_KILLING	0.141789	0.0115398	6.03917	2.9x10^-9	6.9x10^-8	10.6815
GOMF_GDP_DISSOCIATION_INHIBITOR_ACTIVITY	-0.133391	-0.0343959	-6.03042	3.0x10^-9	7.2x10^-8	10.6328
GOBP_POSITIVE_REGULATION_OF_SYNAPSE_ASSEMBLY	-0.126699	0.0110686	-6.0294	3.1x10^-9	7.3x10^-8	10.6271
GOBP_NECROTIC_CELL_DEATH	0.10425	-0.00986019	6.02779	3.1x10^-9	7.3x10^-8	10.6182
GOBP_PROTEIN_ACYLATION	-0.11023	-0.0179553	-6.02153	3.2x10^-9	7.5x10^-8	10.5834
GOBP_CENTRAL_NERVOUS_SYSTEM_PROJECTION_NEURON_AXONOGENESIS	-0.126229	-0.011545	-6.01566	3.3x10^-9	7.8x10^-8	10.5508
GOCC_PCG_PROTEIN_COMPLEX	-0.145453	-0.0297486	-6.01309	3.4x10^-9	7.9x10^-8	10.5365
GOBP_T_HELPER_1_CELL_DIFFERENTIATION	0.147791	0.000466347	6.01153	3.4x10^-9	7.9x10^-8	10.5278
GOCC_AXON_CYTOPLASM	-0.104328	-0.0217199	-6.00669	3.5x10^-9	8.1x10^-8	10.501
GOBP_REGULATION_OF_TOLL_LIKE_RECEPTOR_SIGNALING_PATHWAY	0.122731	-0.00634183	5.9989	3.7x10^-9	8.4x10^-8	10.4579
GOBP_SYNAPTONEMAL_COMPLEX_ORGANIZATION	-0.11064	-0.000790766	-5.99864	3.7x10^-9	8.4x10^-8	10.4564
GOCC_H4_H2A_HISTONE_ACETYLTRANSFERASE_COMPLEX	-0.16129	-0.0165115	-5.99085	3.8x10^-9	8.8x10^-8	10.4133
GOBP_LEUKOCYTE_MEDIATED_CYTOTOXICITY	0.156156	0.0014829	5.98814	3.9x10^-9	8.9x10^-8	10.3983
GOBP_POSITIVE_REGULATION_OF_ALPHA_BETA_T_CELL_ACTIVATION	0.153645	-0.000450619	5.9847	4.0x10^-9	9.0x10^-8	10.3793
GOBP_POSITIVE_REGULATION_OF_MYELOID_LEUKOCYTE_DIFFERENTIATION	0.115458	0.00676323	5.98253	4.0x10^-9	9.1x10^-8	10.3673
GOBP_POSITIVE_REGULATION_OF_EPIDERMAL_CELL_DIFFERENTIATION	0.129007	0.00272102	5.97665	4.2x10^-9	9.4x10^-8	10.3348
GOBP_REGULATION_OF_HIPPO_SIGNALING	-0.146894	-0.011363	-5.97583	4.2x10^-9	9.4x10^-8	10.3303
GOBP_NEURONAL_ION_CHANNEL_CLUSTERING	-0.158805	-0.0182313	-5.97056	4.3x10^-9	9.6x10^-8	10.3012
GOBP_NEGATIVE_REGULATION_OF_LIPASE_ACTIVITY	0.122215	0.00954591	5.95066	4.8x10^-9	1.08e-07	10.1917
GOBP_POSITIVE_REGULATION_OF_HEMOPOIESIS	0.120794	0.00333428	5.94861	4.9x10^-9	1.09e-07	10.1804
GOCC_NPBAF_COMPLEX	-0.181962	-0.0138227	-5.94753	4.9x10^-9	1.09e-07	10.1744
GOBP_ETHANOL_METABOLIC_PROCESS	0.164085	0.00961414	5.94719	4.9x10^-9	1.09e-07	10.1726
GOBP_PROTEIN_ACETYLATION	-0.114586	-0.0192998	-5.94463	5.0x10^-9	1.1e-07	10.1585
GOCC_SYMMETRIC_SYNAPSE	-0.168626	0.0109	-5.93744	5.2x10^-9	1.14e-07	10.119
GOBP_POSITIVE_REGULATION_OF_CD4_POSITIVE_ALPHA_BETA_T_CELL_DIFFERENTIATION	0.172363	0.00188725	5.93695	5.2x10^-9	1.14e-07	10.1163
GOMF_DEATH_RECEPTOR_ACTIVITY	0.174433	0.00871616	5.9281	5.5x10^-9	1.2e-07	10.0678
GOBP_NEGATIVE_REGULATION_OF_AXONOGENESIS	-0.105065	-0.0116659	-5.92336	5.7x10^-9	1.23e-07	10.0418
GOBP_T_CELL_HOMEOSTASIS	0.114988	-0.00335432	5.92205	5.7x10^-9	1.23e-07	10.0347
GOBP_REGULATION_OF_ACTIN_NUCLEATION	0.115595	0.000493656	5.91871	5.8x10^-9	1.25e-07	10.0164
GOBP_RESPONSE_TO_LIPOTEICHOIC_ACID	0.182113	0.00854811	5.91658	5.9x10^-9	1.26e-07	10.0047
GOBP_MAMMARY_GLAND_ALVEOLUS_DEVELOPMENT	0.133157	0.00861492	5.91114	6.1x10^-9	1.29e-07	9.97494
GOBP_EMBRYONIC_VISCEROCRANIUM_MORPHOGENESIS	-0.149835	-0.00753827	-5.9096	6.1x10^-9	1.3e-07	9.96652
GOBP_NEGATIVE_REGULATION_OF_MICROTUBULE_POLYMERIZATION	-0.1294	-0.0223651	-5.90632	6.3x10^-9	1.32e-07	9.94862
GOBP_HEPATOCYTE_DIFFERENTIATION	0.120867	0.0109515	5.90368	6.4x10^-9	1.33e-07	9.93417
GOBP_LYMPHOCYTE_ACTIVATION_INVOLVED_IN_IMMUNE_RESPONSE	0.119066	0.00638702	5.89582	6.6x10^-9	1.39e-07	9.89128
GOBP_BILE_ACID_AND_BILE_SALT_TRANSPORT	0.124499	0.0264331	5.8948	6.7x10^-9	1.39e-07	9.88572
GOBP_T_CELL_MIGRATION	0.151639	-0.000186006	5.89089	6.8x10^-9	1.42e-07	9.86441
GOCC_EXTRINSIC_COMPONENT_OF_SYNAPTIC_MEMBRANE	-0.155825	-0.0141782	-5.88752	7.0x10^-9	1.44e-07	9.84607
GOBP_REGULATION_OF_HISTONE_H3_K9_TRIMETHYLATION	-0.149501	-0.0213493	-5.88317	7.1x10^-9	1.48e-07	9.82236
GOBP_HISTONE_H3_K9_TRIMETHYLATION	-0.152853	-0.0270933	-5.87904	7.3x10^-9	1.51e-07	9.79985
GOBP_REGULATION_OF_ALPHA_BETA_T_CELL_DIFFERENTIATION	0.136113	-0.00262775	5.87668	7.4x10^-9	1.52e-07	9.78703
GOBP_REGULATION_OF_T_CELL_MIGRATION	0.138623	-0.00183914	5.87512	7.5x10^-9	1.53e-07	9.77856
GOBP_REGULATION_OF_PROTEIN_LOCALIZATION_TO_SYNAPSE	-0.12232	-0.0229216	-5.87015	7.7x10^-9	1.57e-07	9.75151
GOBP_NEGATIVE_REGULATION_OF_TUMOR_NECROSIS_FACTOR_SUPERFAMILY_CYTOKINE_PRODUCTION	0.144906	0.00613352	5.86942	7.7x10^-9	1.57e-07	9.74756
GOBP_CELLULAR_DEFENSE_RESPONSE	0.172421	0.0166511	5.8688	7.8x10^-9	1.57e-07	9.74421
GOBP_REGULATION_OF_CELL_COMMUNICATION_BY_ELECTRICAL_COUPLING_INVOLVED_IN_CARDIAC_CONDUCTION	0.147464	0.0248551	5.86019	8.1x10^-9	1.64e-07	9.69745
GOMF_CHROMATIN_DNA_BINDING	-0.113215	-0.00758931	-5.85783	8.3x10^-9	1.66e-07	9.68464
GOBP_NEGATIVE_REGULATION_OF_LIPOPROTEIN_PARTICLE_CLEARANCE	0.14565	0.0113796	5.85735	8.3x10^-9	1.66e-07	9.68202
GOMF_ALDO_KETO_REDUCTASE_NADP_ACTIVITY	0.136931	-0.00253095	5.84951	8.7x10^-9	1.73e-07	9.63957
GOBP_REGULATION_OF_GASTRULATION	-0.123087	0.00287937	-5.84613	8.8x10^-9	1.76e-07	9.62124
GOBP_NEGATIVE_REGULATION_OF_GLUCONEOGENESIS	-0.1079	-0.000132286	-5.84117	9.1x10^-9	1.8e-07	9.59438
GOBP_DENDRITIC_CELL_CHEMOTAXIS	0.184509	0.00617255	5.84054	9.1x10^-9	1.8e-07	9.59099
GOBP_ALTERNATIVE_MRNA_SPLICING_VIA_SPLICEOSOME	-0.134207	-0.0154941	-5.83928	9.2x10^-9	1.81e-07	9.58419
GOBP_POLYAMINE_METABOLIC_PROCESS	0.124522	-0.0170981	5.83781	9.2x10^-9	1.81e-07	9.57624
GOBP_KERATINOCYTE_DEVELOPMENT	0.140473	0.0168775	5.83674	9.3x10^-9	1.82e-07	9.57046
GOMF_QUATERNARY_AMMONIUM_GROUP_TRANSMEMBRANE_TRANSPORTER_ACTIVITY	0.151705	0.00320149	5.83303	9.5x10^-9	1.85e-07	9.55038
GOBP_NEUTROPHIL_MIGRATION	0.141354	0.00771728	5.83104	9.6x10^-9	1.87e-07	9.53963
GOMF_AMINO_ACID_SODIUM_SYMPORTER_ACTIVITY	-0.146512	0.0123646	-5.82895	9.7x10^-9	1.88e-07	9.52833
GOBP_POSITIVE_THYMIC_T_CELL_SELECTION	0.184191	0.00290207	5.82796	9.8x10^-9	1.89e-07	9.52301
GOMF_CALCIUM_DEPENDENT_CYSTEINE_TYPE_ENDOPEPTIDASE_ACTIVITY	0.149408	0.00101572	5.8198	1.0x10^-8	1.97e-07	9.47893
GOBP_DIGESTIVE_SYSTEM_PROCESS	0.109318	0.0137505	5.81537	1.0x10^-8	2.01e-07	9.45507
GOMF_NAD_DEPENDENT_PROTEIN_DEACETYLASE_ACTIVITY	-0.140328	-0.0303338	-5.81341	1.0x10^-8	2.03e-07	9.4445
GOBP_REGULATION_OF_DNA_RECOMBINATION	-0.118625	-0.0194731	-5.8111	1.0x10^-8	2.05e-07	9.43209
GOBP_SPLICEOSOMAL_TRI_SNRNP_COMPLEX_ASSEMBLY	-0.182972	-0.0336712	-5.80976	1.0x10^-8	2.06e-07	9.42485
GOMF_NUCLEOTIDE_RECEPTOR_ACTIVITY	0.176322	0.00777621	5.80912	1.0x10^-8	2.06e-07	9.42139
GOBP_NEGATIVE_REGULATION_OF_MYELOID_CELL_APOPTOTIC_PROCESS	0.145463	0.0106949	5.80661	1.1x10^-8	2.08e-07	9.40788
GOBP_REGULATION_OF_STORE_OPERATED_CALCIUM_ENTRY	0.133709	-0.00271556	5.80008	1.1x10^-8	2.14e-07	9.37275
GOBP_B_CELL_RECEPTOR_SIGNALING_PATHWAY	0.175452	-0.00453368	5.79944	1.1x10^-8	2.14e-07	9.36933
GOBP_REGULATION_OF_DENDRITIC_CELL_ANTIGEN_PROCESSING_AND_PRESENTATION	0.218012	0.00371378	5.79426	1.1x10^-8	2.19e-07	9.34148
GOBP_GRANULOCYTE_ACTIVATION	0.156507	0.00816224	5.79406	1.1x10^-8	2.19e-07	9.34039
GOBP_RESPONSE_TO_IRON_ION	0.105364	0.000730706	5.78999	1.2x10^-8	2.23e-07	9.31854
GOBP_POSITIVE_REGULATION_OF_LYMPHOCYTE_DIFFERENTIATION	0.13119	0.00331067	5.78809	1.2x10^-8	2.25e-07	9.30836
GOBP_MACROPHAGE_MIGRATION	0.138243	0.0026318	5.77956	1.2x10^-8	2.35e-07	9.26258
GOBP_CEREBRAL_CORTEX_CELL_MIGRATION	-0.108268	-0.0111758	-5.77669	1.3x10^-8	2.38e-07	9.24719
GOBP_REGULATION_OF_T_HELPER_2_CELL_DIFFERENTIATION	0.160958	0.0050482	5.76965	1.3x10^-8	2.47e-07	9.20949
GOBP_CELLULAR_RESPONSE_TO_ELECTRICAL_STIMULUS	-0.147141	-0.0109941	-5.76797	1.3x10^-8	2.49e-07	9.20054
GOMF_NAD_RETINOL_DEHYDROGENASE_ACTIVITY	0.151516	0.0262306	5.76597	1.3x10^-8	2.5e-07	9.18983
GOBP_REGULATION_OF_CELL_MATURATION	-0.117201	-0.013514	-5.76534	1.3x10^-8	2.5e-07	9.18644
GOBP_REGULATION_OF_DOPAMINE_RECEPTOR_SIGNALING_PATHWAY	-0.13366	0.0108219	-5.76524	1.4e-08	2.5e-07	9.18593
GOBP_POSITIVE_REGULATION_OF_GLUCONEOGENESIS	-0.11112	-0.0139053	-5.76407	1.4e-08	2.51e-07	9.17966
GOBP_POSITIVE_REGULATION_OF_T_CELL_MIGRATION	0.14681	-0.00605315	5.7572	1.4x10^-8	2.6e-07	9.14293
GOBP_PYRIMIDINE_RIBONUCLEOTIDE_BIOSYNTHETIC_PROCESS	0.108506	-0.0149978	5.75627	1.4x10^-8	2.61e-07	9.13795
GOCC_H3_HISTONE_ACETYLTRANSFERASE_COMPLEX	-0.187699	-0.0288026	-5.75339	1.4x10^-8	2.65e-07	9.12259
GOBP_DETECTION_OF_OTHER_ORGANISM	0.177429	0.0163423	5.74596	1.5x10^-8	2.74e-07	9.08295
GOBP_HYPEROSMOTIC_SALINITY_RESPONSE	-0.127185	-0.00403388	-5.7412	1.5x10^-8	2.81e-07	9.05755
GOBP_ORGAN_OR_TISSUE_SPECIFIC_IMMUNE_RESPONSE	0.153205	0.0296092	5.73614	1.6x10^-8	2.87e-07	9.03064
GOBP_NEGATIVE_REGULATION_OF_STEROL_TRANSPORT	0.15146	0.0095795	5.73604	1.6x10^-8	2.87e-07	9.03009
GOBP_REGULATION_OF_DNA_REPAIR	-0.126449	-0.0199297	-5.72795	1.7x10^-8	2.99e-07	8.98704
GOBP_DIET_INDUCED_THERMOGENESIS	0.142992	0.0166104	5.72439	1.7x10^-8	3.04e-07	8.96811
GOBP_POST_EMBRYONIC_ANIMAL_MORPHOGENESIS	-0.127216	0.00169803	-5.72156	1.7x10^-8	3.08e-07	8.95304
GOBP_HOMOLOGOUS_CHROMOSOME_PAIRING_AT_MEIOSIS	-0.110783	-0.00590574	-5.71532	1.8x10^-8	3.18e-07	8.91994
GOBP_ENDODERMAL_CELL_FATE_COMMITMENT	0.112591	-0.0109766	5.70279	1.9x10^-8	3.4e-07	8.85346
GOBP_HETEROCHROMATIN_ORGANIZATION	-0.119299	-0.013945	-5.7024	1.9x10^-8	3.4e-07	8.85144
GOCC_MHC_CLASS_II_PROTEIN_COMPLEX	0.270859	0.0184116	5.69986	2.0x10^-8	3.43e-07	8.83794
GOBP_REGULATION_OF_HEPATOCYTE_PROLIFERATION	0.139288	0.00593132	5.69461	2.0x10^-8	3.52e-07	8.81016
GOBP_DEFENSE_RESPONSE_TO_GRAM_POSITIVE_BACTERIUM	0.131528	0.0179646	5.69227	2.0x10^-8	3.55e-07	8.7978
GOBP_ADAPTIVE_IMMUNE_RESPONSE	0.141985	0.00591287	5.69125	2.1e-08	3.56e-07	8.79239
GOBP_POSITIVE_REGULATION_OF_T_HELPER_1_TYPE_IMMUNE_RESPONSE	0.177018	0.0138204	5.68372	2.1x10^-8	3.69e-07	8.75263
GOBP_POSITIVE_REGULATION_OF_DOUBLE_STRAND_BREAK_REPAIR_VIA_HOMOLOGOUS_RECOMBINATION	-0.146584	-0.0195674	-5.67771	2.2x10^-8	3.79e-07	8.72085
GOBP_NEGATIVE_REGULATION_OF_ADAPTIVE_IMMUNE_RESPONSE	0.140606	0.0087113	5.67765	2.2x10^-8	3.79e-07	8.72057
GOMF_ACTININ_BINDING	0.115264	0.0203245	5.67749	2.2x10^-8	3.79e-07	8.71973
GOBP_NEUROTRANSMITTER_RECEPTOR_INTERNALIZATION	-0.141162	0.0141273	-5.67508	2.3e-08	3.83e-07	8.70702
GOMF_PURINE_NUCLEOTIDE_TRANSMEMBRANE_TRANSPORTER_ACTIVITY	-0.118066	-0.0347241	-5.66367	2.4x10^-8	4.04e-07	8.64685
GOBP_POSITIVE_REGULATION_OF_LYMPHOCYTE_MIGRATION	0.144477	-0.00718859	5.65798	2.5x10^-8	4.16e-07	8.61689
GOMF_TUMOR_NECROSIS_FACTOR_ACTIVATED_RECEPTOR_ACTIVITY	0.182791	0.00982557	5.65463	2.5x10^-8	4.22e-07	8.59928
GOBP_LYMPHOCYTE_MEDIATED_IMMUNITY	0.137119	0.00461965	5.65354	2.5x10^-8	4.23e-07	8.59356
GOBP_PURINE_NUCLEOTIDE_TRANSPORT	-0.102869	-0.0252998	-5.65252	2.6e-08	4.25e-07	8.5882
GOBP_PROTEIN_TRIMERIZATION	0.141323	0.00660384	5.64996	2.6x10^-8	4.3e-07	8.57476
GOMF_NAD_P_PLUS_NUCLEOSIDASE_ACTIVITY	0.174443	0.0154355	5.63928	2.8e-08	4.54e-07	8.5187
GOBP_NEUROMUSCULAR_SYNAPTIC_TRANSMISSION	-0.113079	0.00489455	-5.63626	2.8x10^-8	4.61e-07	8.50282
GOBP_REGULATION_OF_ALPHA_BETA_T_CELL_ACTIVATION	0.139368	-0.00278123	5.63438	2.8x10^-8	4.65e-07	8.49297
GOBP_REGULATION_OF_LIPOPOLYSACCHARIDE_MEDIATED_SIGNALING_PATHWAY	0.127612	0.0170753	5.63325	2.8x10^-8	4.66e-07	8.48707
GOBP_CHROMOSOME_ORGANIZATION_INVOLVED_IN_MEIOTIC_CELL_CYCLE	-0.11769	-0.0112736	-5.62836	2.9x10^-8	4.78e-07	8.46143
GOBP_TETRAPYRROLE_CATABOLIC_PROCESS	0.164796	0.0132656	5.62038	3.1e-08	4.97e-07	8.41969
GOBP_NEGATIVE_REGULATION_OF_MULTICELLULAR_ORGANISM_GROWTH	0.145343	-0.00517823	5.60926	3.3e-08	5.25e-07	8.36157
GOBP_GRANULOCYTE_MIGRATION	0.131994	0.00590337	5.60264	3.4x10^-8	5.42e-07	8.32703
GOBP_REGULATION_OF_PHOSPHOLIPASE_A2_ACTIVITY	0.128665	0.00349383	5.60043	3.4x10^-8	5.47e-07	8.31548
GOBP_REGULATION_OF_HUMORAL_IMMUNE_RESPONSE	0.138811	0.0211441	5.59094	3.6x10^-8	5.72e-07	8.26606
GOBP_POSITIVE_REGULATION_OF_LONG_TERM_SYNAPTIC_POTENTIATION	-0.10839	-0.0020469	-5.58814	3.7e-08	5.8e-07	8.25151
GOBP_POSITIVE_REGULATION_OF_CALCIUM_ION_DEPENDENT_EXOCYTOSIS	-0.153563	0.00436197	-5.58682	3.7x10^-8	5.81e-07	8.24461
GOBP_REGULATION_OF_CILIUM_BEAT_FREQUENCY	0.176319	-0.0109096	5.58672	3.7x10^-8	5.81e-07	8.24409
GOBP_NEGATIVE_REGULATION_OF_LEUKOCYTE_DEGRANULATION	0.199342	0.00913492	5.57833	3.9e-08	6.07e-07	8.20049
GOBP_REGULATION_OF_DOUBLE_STRAND_BREAK_REPAIR_VIA_NONHOMOLOGOUS_END_JOINING	-0.130231	-0.0336597	-5.578	3.9x10^-8	6.07e-07	8.19877
GOBP_HISTONE_H3_K14_ACETYLATION	-0.139321	-0.03262	-5.5723	4.0x10^-8	6.23e-07	8.16917
GOCC_PROTEIN_ACETYLTRANSFERASE_COMPLEX	-0.144412	-0.0190433	-5.57122	4.0x10^-8	6.24e-07	8.16358
GOBP_PEPTIDE_ANTIGEN_ASSEMBLY_WITH_MHC_CLASS_II_PROTEIN_COMPLEX	0.2638	0.0153314	5.57063	4.0x10^-8	6.24e-07	8.16048
GOBP_REGULATION_OF_RESPIRATORY_GASEOUS_EXCHANGE_BY_NERVOUS_SYSTEM_PROCESS	-0.149496	0.00212256	-5.57029	4.0x10^-8	6.24e-07	8.15873
GOBP_HOMOLOGOUS_CHROMOSOME_SEGREGATION	-0.108404	-0.00746307	-5.5668	4.1x10^-8	6.34e-07	8.14061
GOBP_REGULATION_OF_ALTERNATIVE_MRNA_SPLICING_VIA_SPLICEOSOME	-0.120521	-0.0133006	-5.5636	4.2x10^-8	6.41e-07	8.12405
GOBP_OSTEOCLAST_DEVELOPMENT	0.127064	-0.00338052	5.55857	4.3x10^-8	6.57e-07	8.098
GOBP_REGULATION_OF_T_HELPER_CELL_DIFFERENTIATION	0.137156	-0.00162353	5.5572	4.3x10^-8	6.6e-07	8.09091
GOBP_DETECTION_OF_EXTERNAL_BIOTIC_STIMULUS	0.168243	0.0138811	5.55682	4.3x10^-8	6.6e-07	8.08894
GOBP_POSITIVE_REGULATION_OF_T_CELL_PROLIFERATION	0.151609	0.000412838	5.55351	4.4x10^-8	6.68e-07	8.07178
GOBP_REGULATION_OF_T_CELL_MEDIATED_CYTOTOXICITY	0.17329	0.00501191	5.54938	4.5x10^-8	6.81e-07	8.05042
GOBP_POSITIVE_REGULATION_OF_INTERLEUKIN_6_PRODUCTION	0.114794	0.00737809	5.54601	4.6x10^-8	6.88e-07	8.03302
GOBP_NEGATIVE_REGULATION_OF_RESPONSE_TO_FOOD	0.132179	0.0112381	5.53921	4.8x10^-8	7.1e-07	7.99785
GOBP_NEGATIVE_REGULATION_OF_LYMPHOCYTE_MEDIATED_IMMUNITY	0.150719	0.0105684	5.53313	4.9x10^-8	7.31e-07	7.96648
GOBP_REGULATION_OF_AMINO_ACID_TRANSMEMBRANE_TRANSPORT	0.123566	-0.00025883	5.53186	5.0x10^-8	7.34e-07	7.95994
GOBP_MITOTIC_SISTER_CHROMATID_COHESION	-0.14825	-0.0189889	-5.53065	5.0x10^-8	7.37e-07	7.95372
GOBP_T_CELL_MEDIATED_IMMUNITY	0.141017	0.00576784	5.52516	5.2e-08	7.58e-07	7.92539
GOCC_MOTILE_CILIUM	0.122274	0.00081009	5.51672	5.4x10^-8	7.86e-07	7.88197
GOBP_NATURAL_KILLER_CELL_MEDIATED_IMMUNITY	0.148088	-0.00359147	5.51056	5.6x10^-8	8.11e-07	7.8503
GOBP_NUCLEOSOME_ORGANIZATION	-0.12212	-0.0172806	-5.50316	5.8x10^-8	8.4e-07	7.81227
GOMF_NF_KAPPAB_BINDING	-0.126551	-0.0263474	-5.50249	5.8x10^-8	8.41e-07	7.80881
GOCC_DNA_PACKAGING_COMPLEX	-0.139795	-0.00812622	-5.50178	5.8x10^-8	8.43e-07	7.80519
GOMF_STRUCTURAL_CONSTITUENT_OF_SYNAPSE	-0.126484	-0.0133287	-5.49919	5.9x10^-8	8.52e-07	7.7919
GOMF_NUCLEOTIDE_TRANSMEMBRANE_TRANSPORTER_ACTIVITY	-0.111377	-0.0340908	-5.49893	5.9x10^-8	8.52e-07	7.79054
GOBP_OPTIC_NERVE_DEVELOPMENT	-0.114278	0.000340593	-5.49631	6.0x10^-8	8.62e-07	7.77715
GOBP_REGULATION_OF_CHRONIC_INFLAMMATORY_RESPONSE	0.18584	0.0144374	5.49061	6.2x10^-8	8.87e-07	7.74794
GOBP_CD4_POSITIVE_ALPHA_BETA_T_CELL_DIFFERENTIATION	0.132188	-0.000130958	5.49023	6.2x10^-8	8.87e-07	7.74595
GOBP_POSITIVE_REGULATION_OF_CELL_KILLING	0.163997	0.00817478	5.48566	6.4x10^-8	9.07e-07	7.72255
GOBP_REGULATION_OF_MALE_GONAD_DEVELOPMENT	-0.141091	0.0113243	-5.48534	6.4x10^-8	9.07e-07	7.72095
GOBP_HIPPO_SIGNALING	-0.140791	-0.0112817	-5.47963	6.6x10^-8	9.32e-07	7.69172
GOBP_REGULATION_OF_MACROPHAGE_MIGRATION	0.144242	0.00236628	5.4794	6.6x10^-8	9.32e-07	7.69054
GOBP_RESPONSE_TO_MUSCLE_ACTIVITY	-0.107112	0.000599592	-5.47693	6.7x10^-8	9.41e-07	7.67792
GOBP_REGULATION_OF_NATURAL_KILLER_CELL_MEDIATED_IMMUNITY	0.166032	0.00292483	5.4703	6.9x10^-8	9.72e-07	7.64407
GOBP_VENTRICULAR_SYSTEM_DEVELOPMENT	0.107748	-0.00321022	5.4682	7.0x10^-8	9.78e-07	7.63334
GOMF_ALCOHOL_DEHYDROGENASE_NADPPLUS_ACTIVITY	0.144846	0.00211696	5.46811	7.0x10^-8	9.78e-07	7.63289
GOBP_POSITIVE_T_CELL_SELECTION	0.170032	-0.00648776	5.46801	7.0x10^-8	9.78e-07	7.63234
GOBP_SYNAPTIC_MEMBRANE_ADHESION	-0.127539	0.0122337	-5.466	7.1x10^-8	9.86e-07	7.62208
GOBP_LEUKOCYTE_MIGRATION	0.115065	0.0015888	5.46575	7.1x10^-8	9.86e-07	7.62082
GOBP_REGULATION_OF_AXON_GUIDANCE	-0.119994	0.0132337	-5.4626	7.2x10^-8	1e-06	7.60475
GOBP_NEGATIVE_REGULATION_OF_GENE_EXPRESSION_EPIGENETIC	-0.115411	-0.0136728	-5.46131	7.3x10^-8	1.01e-06	7.59816
GOBP_CD8_POSITIVE_ALPHA_BETA_T_CELL_ACTIVATION	0.177834	0.00295691	5.4592	7.4e-08	1.01e-06	7.58743
GOBP_POSITIVE_REGULATION_OF_TOLL_LIKE_RECEPTOR_4_SIGNALING_PATHWAY	0.150457	0.00750681	5.4495	7.7x10^-8	1.07e-06	7.53801
GOBP_EMBRYONIC_DIGESTIVE_TRACT_MORPHOGENESIS	0.133633	0.0190914	5.44636	7.9x10^-8	1.08e-06	7.52204
GOBP_REGULATION_OF_LEUKOCYTE_MEDIATED_CYTOTOXICITY	0.158702	0.00581728	5.44514	7.9x10^-8	1.09e-06	7.51582
GOBP_POSITIVE_REGULATION_OF_CELL_CELL_ADHESION	0.122018	0.0024758	5.44228	8.1e-08	1.1e-06	7.50128
GOBP_REGULATION_OF_ANTIGEN_PROCESSING_AND_PRESENTATION	0.193212	0.00870868	5.43852	8.2x10^-8	1.12e-06	7.48217
GOBP_POSITIVE_REGULATION_OF_DNA_REPAIR	-0.115956	-0.0196021	-5.43837	8.2x10^-8	1.12e-06	7.48143
GOBP_REGULATION_OF_CILIUM_MOVEMENT	0.1526	0.0186922	5.43592	8.3x10^-8	1.13e-06	7.46898
GOBP_ANTIGEN_PROCESSING_AND_PRESENTATION_VIA_MHC_CLASS_IB	0.197273	0.0071567	5.43359	8.4x10^-8	1.14e-06	7.45715
GOBP_NEUTROPHIL_CHEMOTAXIS	0.136514	0.00615327	5.43194	8.5x10^-8	1.15e-06	7.44881
GOBP_ATP_TRANSPORT	-0.115968	-0.0304514	-5.42927	8.6x10^-8	1.16e-06	7.43522
GOBP_RESPONSE_TO_MACROPHAGE_COLONY_STIMULATING_FACTOR	0.160576	0.00342882	5.42734	8.7x10^-8	1.17e-06	7.42548
GOMF_CHEMOKINE_ACTIVITY	0.164195	0.00792081	5.42542	8.8x10^-8	1.18e-06	7.41572
GOBP_ANTIGEN_PROCESSING_AND_PRESENTATION_OF_EXOGENOUS_ANTIGEN	0.18157	0.0076064	5.42288	8.9x10^-8	1.19e-06	7.40284
GOBP_HUMORAL_IMMUNE_RESPONSE_MEDIATED_BY_CIRCULATING_IMMUNOGLOBULIN	0.153191	0.0169916	5.42257	8.9x10^-8	1.19e-06	7.40127
GOBP_NEGATIVE_REGULATION_OF_NUCLEAR_TRANSCRIBED_MRNA_CATABOLIC_PROCESS_DEADENYLATION_DEPENDENT_DECAY	-0.186636	-0.0213395	-5.4219	9.0x10^-8	1.2e-06	7.3979
GOBP_NEGATIVE_REGULATION_OF_INTERLEUKIN_6_PRODUCTION	0.138029	0.0118979	5.41676	9.2x10^-8	1.22e-06	7.37184
GOBP_B_CELL_MEDIATED_IMMUNITY	0.133278	0.00563461	5.41368	9.4x10^-8	1.24e-06	7.35626
GOBP_REGULATION_OF_NEUROTROPHIN_TRK_RECEPTOR_SIGNALING_PATHWAY	-0.125248	-0.0118713	-5.41036	9.5x10^-8	1.26e-06	7.33947
GOBP_REGULATION_OF_FATTY_ACID_TRANSPORT	0.107524	0.00786474	5.40815	9.7e-08	1.27e-06	7.32832
GOBP_BRANCH_ELONGATION_OF_AN_EPITHELIUM	0.138079	0.0216013	5.40711	9.7x10^-8	1.28e-06	7.32306
GOMF_INTRAMOLECULAR_OXIDOREDUCTASE_ACTIVITY_TRANSPOSING_C_C_BONDS	0.139344	0.0141715	5.40229	1e-07	1.31e-06	7.29872
GOMF_NUCLEAR_RECEPTOR_COACTIVATOR_ACTIVITY	-0.12464	-0.0146033	-5.40095	1.01e-07	1.31e-06	7.29193
GOBP_ERYTHROCYTE_MATURATION	0.116555	0.00667683	5.39833	1.02e-07	1.33e-06	7.27872
GOBP_POSITIVE_REGULATION_OF_LEUKOCYTE_CELL_CELL_ADHESION	0.131284	0.0010478	5.39746	1.03e-07	1.33e-06	7.27431
GOMF_MECHANOSENSITIVE_ION_CHANNEL_ACTIVITY	0.143596	0.0186396	5.39598	1.03e-07	1.34e-06	7.26684
GOMF_TRANSLATION_REPRESSOR_ACTIVITY	-0.10651	-0.0200195	-5.39504	1.04e-07	1.34e-06	7.26211
GOBP_REGULATION_OF_VASCULAR_WOUND_HEALING	0.163817	-0.00613707	5.39155	1.06e-07	1.37e-06	7.24454
GOBP_DENDRITIC_CELL_MIGRATION	0.159335	0.00444112	5.39032	1.07e-07	1.37e-06	7.2383
GOMF_PROTEIN_HORMONE_RECEPTOR_ACTIVITY	-0.106111	0.0170725	-5.3879	1.08e-07	1.38e-06	7.22611
GOBP_MYELOID_LEUKOCYTE_MIGRATION	0.117458	0.0023857	5.38291	1.11e-07	1.42e-06	7.201
GOBP_ADAPTIVE_IMMUNE_RESPONSE_BASED_ON_SOMATIC_RECOMBINATION_OF_IMMUNE_RECEPTORS_BUILT_FROM_IMMUNOGLOBULIN_SUPERFAMILY_DOMAINS	0.128587	0.00399122	5.38114	1.12e-07	1.43e-06	7.19208
GOBP_TROPHECTODERMAL_CELL_DIFFERENTIATION	-0.115428	-0.0125037	-5.38026	1.12e-07	1.43e-06	7.18765
GOCC_9PLUS2_MOTILE_CILIUM	0.11423	0.00610814	5.37841	1.13e-07	1.44e-06	7.17836
GOBP_POSITIVE_REGULATION_OF_ACUTE_INFLAMMATORY_RESPONSE	0.169362	0.0180199	5.37473	1.16e-07	1.47e-06	7.15986
GOCC_XY_BODY	-0.139458	-0.0134615	-5.37213	1.17e-07	1.48e-06	7.1468
GOMF_SEQUENCE_SPECIFIC_MRNA_BINDING	-0.130874	-0.0224859	-5.36764	1.2e-07	1.51e-06	7.12424
GOBP_REGULATION_OF_LYMPHOCYTE_MEDIATED_IMMUNITY	0.126573	0.00352547	5.36698	1.21e-07	1.52e-06	7.12096
GOBP_NEGATIVE_REGULATION_OF_CELL_KILLING	0.168181	0.00823533	5.36408	1.22e-07	1.53e-06	7.10636
GOBP_CHROMATIN_ASSEMBLY_OR_DISASSEMBLY	-0.114938	-0.0180146	-5.36399	1.22e-07	1.53e-06	7.10591
GOCC_CUL4_RING_E3_UBIQUITIN_LIGASE_COMPLEX	-0.13027	-0.0183625	-5.36359	1.23e-07	1.53e-06	7.1039
GOMF_NUCLEOSIDE_DIPHOSPHATASE_ACTIVITY	0.130228	-0.00120358	5.36311	1.23e-07	1.54e-06	7.10151
GOMF_FATTY_ACID_LIGASE_ACTIVITY	0.109046	0.00645056	5.36215	1.24e-07	1.54e-06	7.09668
GOBP_ESTABLISHMENT_OF_PLANAR_POLARITY_INVOLVED_IN_NEURAL_TUBE_CLOSURE	-0.142748	-0.0152258	-5.35898	1.26e-07	1.56e-06	7.08082
GOBP_AMINO_SUGAR_METABOLIC_PROCESS	0.104519	-0.00721986	5.35606	1.28e-07	1.58e-06	7.06615
GOBP_RETROGRADE_AXONAL_TRANSPORT	-0.108312	-0.0191539	-5.35602	1.28e-07	1.58e-06	7.06599
GOMF_POLY_PYRIMIDINE_TRACT_BINDING	-0.130711	-0.0181439	-5.35524	1.28e-07	1.58e-06	7.06204
GOBP_MODULATION_OF_EXCITATORY_POSTSYNAPTIC_POTENTIAL	-0.103204	-4.2e-05	-5.35159	1.31e-07	1.61e-06	7.04379
GOBP_SPHINGOMYELIN_METABOLIC_PROCESS	0.11995	-0.000665197	5.34855	1.33e-07	1.63e-06	7.02857
GOCC_GABA_ERGIC_SYNAPSE	-0.101351	0.0183453	-5.34513	1.35e-07	1.65e-06	7.01144
GOBP_POSTSYNAPTIC_MEMBRANE_ASSEMBLY	-0.14539	0.0170499	-5.34224	1.37e-07	1.68e-06	6.997
GOBP_CELL_ACTIVATION_INVOLVED_IN_IMMUNE_RESPONSE	0.112348	0.00381929	5.33903	1.4e-07	1.7e-06	6.98095
GOBP_PARAXIAL_MESODERM_DEVELOPMENT	-0.128742	-0.0186833	-5.33821	1.4e-07	1.7e-06	6.97685
GOBP_INNATE_IMMUNE_RESPONSE_IN_MUCOSA	0.173811	0.0289697	5.33766	1.41e-07	1.7e-06	6.9741
GOMF_PROTEIN_KINASE_A_CATALYTIC_SUBUNIT_BINDING	-0.119067	-0.0151385	-5.33386	1.43e-07	1.73e-06	6.95512
GOBP_MRNA_TRANSPORT	-0.131298	-0.0198334	-5.33285	1.44e-07	1.73e-06	6.95011
GOBP_IMMUNE_RESPONSE_TO_TUMOR_CELL	0.136681	-0.0046036	5.32886	1.47e-07	1.76e-06	6.9302
GOMF_OXIDOREDUCTASE_ACTIVITY_ACTING_ON_NAD_P_H	0.114285	-0.0174473	5.32632	1.49e-07	1.79e-06	6.91751
GOBP_POSITIVE_REGULATION_OF_NEURON_MIGRATION	-0.129574	-0.0224854	-5.32227	1.52e-07	1.82e-06	6.89734
GOBP_REGULATION_OF_B_CELL_RECEPTOR_SIGNALING_PATHWAY	0.161008	-0.00563272	5.31918	1.55e-07	1.85e-06	6.88193
GOBP_T_CELL_LINEAGE_COMMITMENT	0.133232	-0.00574929	5.31323	1.6e-07	1.9e-06	6.85233
GOMF_NEUROTRANSMITTER_RECEPTOR_REGULATOR_ACTIVITY	-0.164093	-0.00489774	-5.31262	1.6e-07	1.9e-06	6.8493
GOBP_AROMATIC_AMINO_ACID_FAMILY_CATABOLIC_PROCESS	0.138131	0.0102932	5.31099	1.62e-07	1.91e-06	6.84116
GOBP_POSITIVE_REGULATION_OF_INTERLEUKIN_1_BETA_PRODUCTION	0.136666	0.00134505	5.31012	1.62e-07	1.92e-06	6.83683
GOBP_NUCLEOBASE_CONTAINING_COMPOUND_TRANSPORT	-0.105036	-0.0192189	-5.30733	1.65e-07	1.94e-06	6.82299
GOBP_REGULATION_OF_LIPOPROTEIN_METABOLIC_PROCESS	-0.104835	-0.00834629	-5.30433	1.67e-07	1.97e-06	6.80807
GOBP_CD4_POSITIVE_OR_CD8_POSITIVE_ALPHA_BETA_T_CELL_LINEAGE_COMMITMENT	0.160443	-0.0079526	5.30406	1.67e-07	1.97e-06	6.80676
GOBP_POSITIVE_REGULATION_OF_EPITHELIAL_CELL_APOPTOTIC_PROCESS	0.107331	-0.00458461	5.29778	1.73e-07	2.03e-06	6.77555
GOBP_REGULATION_OF_COLLATERAL_SPROUTING	-0.11154	-0.00287552	-5.29762	1.73e-07	2.03e-06	6.77478
GOBP_DETECTION_OF_BIOTIC_STIMULUS	0.13016	0.0062232	5.29553	1.75e-07	2.04e-06	6.76442
GOBP_INTERLEUKIN_6_PRODUCTION	0.114504	0.00796109	5.29449	1.76e-07	2.05e-06	6.75924
GOBP_LEUKOCYTE_MEDIATED_IMMUNITY	0.122282	0.00254475	5.2932	1.77e-07	2.06e-06	6.75283
GOBP_POSITIVE_REGULATION_OF_GLYCOPROTEIN_METABOLIC_PROCESS	0.105934	0.00264626	5.29218	1.78e-07	2.07e-06	6.74777
GOBP_AMINOGLYCAN_CATABOLIC_PROCESS	0.117548	0.0160961	5.28832	1.82e-07	2.1e-06	6.72866
GOBP_GRANULOCYTE_CHEMOTAXIS	0.127878	0.00347163	5.28684	1.83e-07	2.12e-06	6.72131
GOBP_CELL_CHEMOTAXIS	0.110355	8.93e-05	5.28542	1.84e-07	2.13e-06	6.71432
GOBP_POSITIVE_REGULATION_OF_COLLAGEN_METABOLIC_PROCESS	0.137408	0.00693059	5.28473	1.85e-07	2.13e-06	6.71089
GOBP_MANGANESE_ION_TRANSMEMBRANE_TRANSPORT	0.151618	0.00229915	5.2837	1.86e-07	2.13e-06	6.70578
GOMF_MANGANESE_ION_TRANSMEMBRANE_TRANSPORTER_ACTIVITY	0.151618	0.00229915	5.2837	1.86e-07	2.13e-06	6.70578
GOBP_RETINAL_ROD_CELL_DIFFERENTIATION	0.128755	0.00704285	5.28366	1.86e-07	2.13e-06	6.70559
GOBP_REGULATION_OF_GENE_EXPRESSION_EPIGENETIC	-0.1045	-0.0114116	-5.2835	1.86e-07	2.13e-06	6.70479
GOMF_MHC_CLASS_II_PROTEIN_COMPLEX_BINDING	0.192428	0.00998605	5.2805	1.89e-07	2.16e-06	6.68995
GOBP_POSITIVE_REGULATION_OF_CD4_POSITIVE_ALPHA_BETA_T_CELL_ACTIVATION	0.143382	0.00220783	5.27679	1.93e-07	2.2e-06	6.67159
GOBP_LATERAL_VENTRICLE_DEVELOPMENT	0.125066	0.0064291	5.2736	1.96e-07	2.23e-06	6.65581
GOBP_NEGATIVE_REGULATION_OF_NEUROTRANSMITTER_TRANSPORT	-0.123174	-0.00297714	-5.27349	1.96e-07	2.23e-06	6.65529
GOBP_REGULATION_OF_CELL_KILLING	0.143983	0.00651158	5.27037	1.99e-07	2.26e-06	6.63986
GOCC_EXTERNAL_SIDE_OF_PLASMA_MEMBRANE	0.125774	0.0069121	5.26119	2.09e-07	2.36e-06	6.59457
GOBP_POSITIVE_REGULATION_OF_FATTY_ACID_BETA_OXIDATION	-0.137563	-0.00463992	-5.25538	2.15e-07	2.42e-06	6.56595
GOBP_NEGATIVE_REGULATION_OF_LIPOPOLYSACCHARIDE_MEDIATED_SIGNALING_PATHWAY	0.129333	0.0151096	5.25474	2.16e-07	2.43e-06	6.56279
GOBP_NEGATIVE_REGULATION_OF_RESPONSE_TO_REACTIVE_OXYGEN_SPECIES	0.120122	0.00099774	5.25388	2.17e-07	2.43e-06	6.55853
GOBP_POSITIVE_REGULATION_OF_ALPHA_BETA_T_CELL_PROLIFERATION	0.176463	0.00363588	5.25125	2.2e-07	2.46e-06	6.54558
GOBP_INNER_CELL_MASS_CELL_PROLIFERATION	-0.185407	-0.0230259	-5.24989	2.22e-07	2.46e-06	6.53891
GOBP_MODIFICATION_OF_POSTSYNAPTIC_STRUCTURE	-0.118052	-0.0195193	-5.24932	2.22e-07	2.47e-06	6.53612
GOBP_SPERM_CAPACITATION	0.128751	0.0221135	5.24537	2.27e-07	2.51e-06	6.51667
GOBP_SUBSTRATE_INDEPENDENT_TELENCEPHALIC_TANGENTIAL_MIGRATION	-0.14452	0.0252721	-5.244	2.29e-07	2.52e-06	6.50993
GOBP_CELLULAR_RESPONSE_TO_DSRNA	-0.125634	-0.016953	-5.24393	2.29e-07	2.52e-06	6.5096
GOBP_CILIUM_MOVEMENT	0.130523	0.00619337	5.24345	2.29e-07	2.52e-06	6.50723
GOCC_SIN3_TYPE_COMPLEX	-0.172086	-0.0241557	-5.23967	2.34e-07	2.56e-06	6.48865
GOBP_POSITIVE_REGULATION_OF_DNA_RECOMBINATION	-0.101751	-0.0198821	-5.23193	2.43e-07	2.66e-06	6.45063
GOBP_POSITIVE_REGULATION_OF_INFLAMMATORY_RESPONSE	0.119661	0.00562174	5.22984	2.46e-07	2.68e-06	6.4404
GOBP_POSITIVE_REGULATION_OF_LEUKOCYTE_PROLIFERATION	0.125806	-0.000850962	5.2297	2.46e-07	2.68e-06	6.43971
GOCC_DYNEIN_COMPLEX	0.143578	-0.0122664	5.22954	2.46e-07	2.68e-06	6.43891
GOBP_POSITIVE_REGULATION_OF_NATURAL_KILLER_CELL_MEDIATED_IMMUNITY	0.166069	0.00104523	5.22911	2.47e-07	2.68e-06	6.43681
GOBP_REGULATION_OF_LYMPHOCYTE_MIGRATION	0.119846	-0.0040744	5.22716	2.49e-07	2.71e-06	6.42726
GOBP_REGULATION_OF_PRESYNAPSE_ORGANIZATION	-0.109561	0.0103329	-5.22482	2.52e-07	2.74e-06	6.4158
GOBP_CD4_POSITIVE_ALPHA_BETA_T_CELL_ACTIVATION	0.120695	-0.00118023	5.22037	2.58e-07	2.79e-06	6.394
GOBP_TYPE_2_IMMUNE_RESPONSE	0.126388	0.0115417	5.21698	2.63e-07	2.83e-06	6.3774
GOBP_REGULATION_OF_SYNAPTIC_VESICLE_RECYCLING	-0.106321	-0.0216169	-5.21595	2.64e-07	2.84e-06	6.37237
GOBP_REGULATION_OF_PATTERN_RECOGNITION_RECEPTOR_SIGNALING_PATHWAY	0.10055	-0.0077163	5.21532	2.65e-07	2.85e-06	6.36925
GOBP_RESPONSE_TO_CHEMOKINE	0.135472	0.0048789	5.21356	2.67e-07	2.87e-06	6.36067
GOMF_MRNA_BINDING	-0.105959	-0.0148939	-5.2132	2.68e-07	2.87e-06	6.35891
GOBP_REGULATION_OF_ACROSOME_REACTION	0.135428	0.0437723	5.21237	2.69e-07	2.87e-06	6.35486
GOCC_CYTOSOLIC_REGION	-0.135477	-0.0224246	-5.20865	2.74e-07	2.92e-06	6.33668
GOCC_INTRINSIC_COMPONENT_OF_MITOCHONDRIAL_OUTER_MEMBRANE	-0.117509	-0.0230608	-5.20849	2.74e-07	2.92e-06	6.33586
GOMF_THYROID_HORMONE_RECEPTOR_BINDING	-0.124658	-0.0150492	-5.2017	2.84e-07	3.01e-06	6.30271
GOBP_INTERFERON_GAMMA_PRODUCTION	0.138459	0.00321956	5.19868	2.88e-07	3.05e-06	6.28799
GOBP_REGULATION_OF_PLATELET_ACTIVATION	0.110619	0.0102476	5.19586	2.93e-07	3.09e-06	6.27423
GOBP_REGULATION_OF_T_CELL_MEDIATED_IMMUNITY	0.136006	0.00780948	5.1947	2.94e-07	3.1e-06	6.26858
GOBP_OLIGOSACCHARIDE_BIOSYNTHETIC_PROCESS	0.112207	0.0206068	5.1932	2.97e-07	3.11e-06	6.26123
GOCC_MLL1_2_COMPLEX	-0.150377	-0.0260374	-5.19318	2.97e-07	3.11e-06	6.26116
GOBP_REGULATION_OF_RESPIRATORY_SYSTEM_PROCESS	-0.121755	-0.00140497	-5.19181	2.99e-07	3.13e-06	6.25446
GOBP_NEGATIVE_T_CELL_SELECTION	0.195538	0.011412	5.18963	3.02e-07	3.16e-06	6.24384
GOBP_NEGATIVE_REGULATION_OF_T_CELL_MEDIATED_IMMUNITY	0.163583	0.0194255	5.18853	3.04e-07	3.17e-06	6.23849
GOCC_PROTEIN_DNA_COMPLEX	-0.11453	-0.0137642	-5.17846	3.2e-07	3.33e-06	6.1895
GOBP_POSITIVE_REGULATION_OF_NEUTROPHIL_MIGRATION	0.121159	-0.000202353	5.1755	3.25e-07	3.38e-06	6.17512
GOBP_NEUTROPHIL_MEDIATED_IMMUNITY	0.108335	-0.00120733	5.17506	3.25e-07	3.38e-06	6.17297
GOCC_MHC_PROTEIN_COMPLEX	0.230331	0.0180787	5.1734	3.28e-07	3.4e-06	6.16492
GOBP_G_PROTEIN_COUPLED_PURINERGIC_NUCLEOTIDE_RECEPTOR_SIGNALING_PATHWAY	0.172567	0.010404	5.1705	3.33e-07	3.44e-06	6.15084
GOMF_G_PROTEIN_COUPLED_PURINERGIC_NUCLEOTIDE_RECEPTOR_ACTIVITY	0.172567	0.010404	5.1705	3.33e-07	3.44e-06	6.15084
GOMF_MHC_PROTEIN_COMPLEX_BINDING	0.184264	0.00904099	5.16887	3.36e-07	3.47e-06	6.14294
GOBP_RNA_MEDIATED_GENE_SILENCING_BY_INHIBITION_OF_TRANSLATION	-0.118249	-0.0198939	-5.16832	3.37e-07	3.47e-06	6.14023
GOBP_T_CELL_ACTIVATION_VIA_T_CELL_RECEPTOR_CONTACT_WITH_ANTIGEN_BOUND_TO_MHC_MOLECULE_ON_ANTIGEN_PRESENTING_CELL	0.21178	0.017756	5.167	3.39e-07	3.48e-06	6.13385
GOBP_NEURON_DEATH_IN_RESPONSE_TO_OXIDATIVE_STRESS	0.103455	-0.00885585	5.16552	3.41e-07	3.51e-06	6.12667
GOBP_NEGATIVE_REGULATION_OF_LEUKOCYTE_MEDIATED_IMMUNITY	0.143565	0.0097517	5.16507	3.42e-07	3.51e-06	6.12451
GOMF_RETINOL_BINDING	-0.14782	0.0168108	-5.15904	3.53e-07	3.61e-06	6.09524
GOCC_CHROMATIN_SILENCING_COMPLEX	-0.158783	-0.016811	-5.15696	3.57e-07	3.64e-06	6.08519
GOBP_LYMPHOCYTE_MIGRATION	0.129066	-0.00256106	5.15528	3.6e-07	3.66e-06	6.07705
GOMF_ORGANIC_ACID_SODIUM_SYMPORTER_ACTIVITY	-0.108323	0.0178121	-5.1534	3.63e-07	3.69e-06	6.06797
GOMF_ALPHA_ACTININ_BINDING	0.121013	0.0193713	5.15139	3.67e-07	3.73e-06	6.05821
GOCC_CLEAVAGE_FURROW	-0.100411	-0.0175353	-5.14521	3.79e-07	3.83e-06	6.02835
GOBP_MRNA_EXPORT_FROM_NUCLEUS	-0.136317	-0.0175922	-5.14362	3.82e-07	3.85e-06	6.02066
GOBP_REGULATION_OF_NEUTROPHIL_MIGRATION	0.126253	0.0011055	5.14165	3.85e-07	3.89e-06	6.01115
GOBP_NEUTROPHIL_ACTIVATION_INVOLVED_IN_IMMUNE_RESPONSE	0.157227	0.00196766	5.14099	3.87e-07	3.89e-06	6.00795
GOBP_LEUKOCYTE_CHEMOTAXIS	0.115939	6.34e-05	5.12729	4.15e-07	4.15e-06	5.94186
GOBP_REGULATION_OF_T_HELPER_1_TYPE_IMMUNE_RESPONSE	0.155588	0.00678743	5.12724	4.15e-07	4.15e-06	5.9416
GOBP_ESTABLISHMENT_OF_RNA_LOCALIZATION	-0.120369	-0.0172951	-5.12452	4.2e-07	4.2e-06	5.92851
GOBP_NEGATIVE_REGULATION_OF_ALPHA_BETA_T_CELL_ACTIVATION	0.110527	-0.000369882	5.12395	4.22e-07	4.21e-06	5.92579
GOBP_POSITIVE_REGULATION_OF_LEUKOCYTE_TETHERING_OR_ROLLING	0.172054	0.00539957	5.12317	4.23e-07	4.22e-06	5.92199
GOBP_MESENCHYMAL_CELL_APOPTOTIC_PROCESS	0.128569	0.0191376	5.11987	4.3e-07	4.27e-06	5.90611
GOBP_REGULATION_OF_CD4_POSITIVE_ALPHA_BETA_T_CELL_DIFFERENTIATION	0.130322	-0.00230943	5.11813	4.34e-07	4.29e-06	5.89777
GOMF_HEXOSAMINIDASE_ACTIVITY	0.1563	0.00637053	5.11761	4.35e-07	4.3e-06	5.89528
GOBP_GLUCOSAMINE_CONTAINING_COMPOUND_METABOLIC_PROCESS	0.108039	-0.00885345	5.11731	4.36e-07	4.3e-06	5.89383
GOBP_ASPARTATE_FAMILY_AMINO_ACID_CATABOLIC_PROCESS	0.117862	-0.00398795	5.11415	4.43e-07	4.35e-06	5.87861
GOBP_REGULATION_OF_NUCLEAR_TRANSCRIBED_MRNA_CATABOLIC_PROCESS_DEADENYLATION_DEPENDENT_DECAY	-0.134325	-0.0123826	-5.10984	4.53e-07	4.43e-06	5.85792
GOBP_SECONDARY_PALATE_DEVELOPMENT	-0.108666	0.000588694	-5.10959	4.53e-07	4.43e-06	5.85671
GOBP_MRNA_SPLICE_SITE_SELECTION	-0.127487	-0.0154685	-5.10937	4.54e-07	4.43e-06	5.85566
GOBP_MACROPHAGE_ACTIVATION	0.121168	0.00106442	5.10591	4.62e-07	4.49e-06	5.83906
GOBP_ALDEHYDE_CATABOLIC_PROCESS	0.145992	0.00820928	5.10444	4.65e-07	4.52e-06	5.832
GOBP_TRANSCRIPTION_BY_RNA_POLYMERASE_I	-0.131031	-0.0282472	-5.10327	4.68e-07	4.54e-06	5.82638
GOBP_REGULATION_OF_HISTONE_METHYLATION	-0.11194	-0.0185079	-5.10107	4.73e-07	4.58e-06	5.81581
GOBP_REGULATION_OF_CELL_COMMUNICATION_BY_ELECTRICAL_COUPLING	0.122375	0.0182322	5.09643	4.84e-07	4.68e-06	5.7936
GOBP_REGULATION_OF_FATTY_ACID_BETA_OXIDATION	-0.111566	-0.00254061	-5.09392	4.9e-07	4.74e-06	5.78157
GOBP_INTERLEUKIN_4_PRODUCTION	0.147471	-0.00287629	5.09205	4.95e-07	4.77e-06	5.77262
GOCC_PROTEIN_COMPLEX_INVOLVED_IN_CELL_ADHESION	0.136666	0.00226747	5.08616	5.1e-07	4.9e-06	5.74441
GOMF_THIOESTERASE_BINDING	0.107629	-0.0126597	5.08149	5.22e-07	4.98e-06	5.72209
GOMF_ACID_AMINO_ACID_LIGASE_ACTIVITY	0.114528	-0.00876548	5.08147	5.22e-07	4.98e-06	5.72201
GOMF_MRNA_5_UTR_BINDING	-0.141004	-0.0242614	-5.08146	5.22e-07	4.98e-06	5.72194
GOBP_ANTIGEN_PROCESSING_AND_PRESENTATION_OF_PEPTIDE_OR_POLYSACCHARIDE_ANTIGEN_VIA_MHC_CLASS_II	0.177966	0.00775739	5.07912	5.28e-07	5.03e-06	5.71075
GOBP_AXONAL_TRANSPORT_OF_MITOCHONDRION	-0.110318	-0.0191012	-5.07766	5.32e-07	5.05e-06	5.70377
GOBP_MEIOTIC_CHROMOSOME_SEGREGATION	-0.106454	-0.00885787	-5.07516	5.39e-07	5.11e-06	5.69184
GOCC_CYTOLYTIC_GRANULE	0.169252	-0.00484186	5.07305	5.45e-07	5.16e-06	5.68177
GOCC_SWI_SNF_COMPLEX	-0.116026	-0.0153636	-5.06914	5.55e-07	5.25e-06	5.66312
GOBP_CHOLESTEROL_STORAGE	0.113634	-0.00746335	5.0667	5.62e-07	5.31e-06	5.65148
GOCC_PHAGOCYTIC_CUP	0.135162	0.000195865	5.06563	5.65e-07	5.33e-06	5.64641
GOBP_REGULATION_OF_T_CELL_DIFFERENTIATION	0.103621	8.28e-05	5.06461	5.68e-07	5.34e-06	5.64153
GOBP_POSITIVE_REGULATION_OF_CELL_ACTIVATION	0.114697	-0.00321944	5.06461	5.68e-07	5.34e-06	5.64153
GOBP_PEPTIDE_ANTIGEN_ASSEMBLY_WITH_MHC_PROTEIN_COMPLEX	0.218299	0.00821068	5.06448	5.69e-07	5.34e-06	5.64093
GOBP_POSITIVE_REGULATION_OF_INTERLEUKIN_1_PRODUCTION	0.122655	0.0021785	5.0591	5.84e-07	5.47e-06	5.6153
GOBP_MYD88_DEPENDENT_TOLL_LIKE_RECEPTOR_SIGNALING_PATHWAY	0.143801	0.00426386	5.05474	5.97e-07	5.58e-06	5.59456
GOBP_REGULATION_OF_TRANSCRIPTION_BY_RNA_POLYMERASE_I	-0.134642	-0.0264129	-5.0525	6.04e-07	5.63e-06	5.58389
GOBP_POSITIVE_REGULATION_OF_INTERLEUKIN_12_PRODUCTION	0.132324	0.0060412	5.05088	6.09e-07	5.67e-06	5.57619
GOBP_ASYMMETRIC_CELL_DIVISION	-0.112408	-0.016095	-5.04926	6.13e-07	5.71e-06	5.56849
GOMF_GLUTAMATE_BINDING	0.1149	0.0151763	5.04548	6.25e-07	5.8e-06	5.55056
GOBP_POSITIVE_REGULATION_OF_LEUKOCYTE_MIGRATION	0.107735	-0.00202413	5.04447	6.28e-07	5.82e-06	5.54577
GOBP_POSITIVE_REGULATION_OF_LYMPHOCYTE_MEDIATED_IMMUNITY	0.122719	-0.00114473	5.04371	6.31e-07	5.84e-06	5.54212
GOBP_LIVER_MORPHOGENESIS	0.109887	0.000765414	5.03973	6.43e-07	5.95e-06	5.52324
GOBP_MITOCHONDRION_DISTRIBUTION	-0.119735	-0.0192117	-5.03334	6.64e-07	6.13e-06	5.49296
GOCC_ANCHORED_COMPONENT_OF_SYNAPTIC_VESICLE_MEMBRANE	-0.115911	-0.0261398	-5.02841	6.81e-07	6.27e-06	5.4696
GOBP_RESPONSE_TO_LIGHT_INTENSITY	-0.109075	0.00898045	-5.02678	6.86e-07	6.31e-06	5.46189
GOBP_POSITIVE_REGULATION_OF_NATURAL_KILLER_CELL_MEDIATED_CYTOTOXICITY	0.156613	0.000239658	5.02124	7.05e-07	6.46e-06	5.43569
GOCC_SEX_CHROMOSOME	-0.136457	-0.0121011	-5.01944	7.12e-07	6.51e-06	5.42717
GOBP_T_CELL_DIFFERENTIATION	0.103205	-0.00165526	5.01341	7.33e-07	6.69e-06	5.39869
GOCC_IMMUNOGLOBULIN_COMPLEX_CIRCULATING	0.225624	-0.00607282	5.01142	7.41e-07	6.74e-06	5.3893
GOBP_BRANCHING_MORPHOGENESIS_OF_A_NERVE	-0.126954	-0.000621829	-5.00375	7.69e-07	6.99e-06	5.35313
GOBP_REGULATION_OF_B_CELL_DIFFERENTIATION	0.119765	0.00309148	5.00273	7.73e-07	7.01e-06	5.34833
GOBP_PRIMARY_MIRNA_PROCESSING	-0.143986	-0.00973533	-4.99957	7.85e-07	7.1e-06	5.33345
GOBP_INOSITOL_TRISPHOSPHATE_METABOLIC_PROCESS	0.135822	0.0134947	4.99853	7.89e-07	7.12e-06	5.32855
GOBP_NEGATIVE_REGULATION_OF_MAST_CELL_ACTIVATION_INVOLVED_IN_IMMUNE_RESPONSE	0.151964	0.0140427	4.99758	7.93e-07	7.14e-06	5.32407
GOBP_MANGANESE_ION_TRANSPORT	0.110416	0.0204015	4.99658	7.97e-07	7.17e-06	5.31938
GOBP_CYTOPLASMIC_SEQUESTERING_OF_PROTEIN	-0.112676	-0.0252902	-4.99485	8.04e-07	7.22e-06	5.31121
GOBP_NEGATIVE_REGULATION_OF_HISTONE_METHYLATION	-0.135256	-0.0251195	-4.99234	8.14e-07	7.3e-06	5.29941
GOBP_CRANIAL_NERVE_MORPHOGENESIS	-0.105083	0.00411238	-4.99128	8.18e-07	7.33e-06	5.29444
GOBP_CYSTEINE_METABOLIC_PROCESS	0.121679	0.00345179	4.98811	8.31e-07	7.43e-06	5.27954
GOMF_BILE_ACID_BINDING	0.143954	0.0124078	4.98702	8.36e-07	7.45e-06	5.27439
GOBP_REGULATION_OF_LEUKOCYTE_MIGRATION	0.105155	-0.000657906	4.98663	8.37e-07	7.45e-06	5.27259
GOBP_FATTY_ACID_HOMEOSTASIS	-0.10578	-0.0176708	-4.98627	8.39e-07	7.45e-06	5.27089
GOBP_SISTER_CHROMATID_COHESION	-0.133182	-0.022898	-4.98602	8.4e-07	7.45e-06	5.26973
GOBP_CELL_MIGRATION_IN_HINDBRAIN	-0.107589	0.00435417	-4.97324	8.94e-07	7.92e-06	5.20974
GOBP_REGULATION_OF_HOMOTYPIC_CELL_CELL_ADHESION	0.10305	0.0100164	4.96795	9.18e-07	8.1e-06	5.18495
GOBP_MRNA_MODIFICATION	-0.13924	-0.0148243	-4.96789	9.18e-07	8.1e-06	5.18469
GOBP_NEGATIVE_REGULATION_OF_MEIOTIC_CELL_CYCLE	-0.10562	0.00393689	-4.95916	9.58e-07	8.42e-06	5.14386
GOBP_POSITIVE_REGULATION_OF_HOMOTYPIC_CELL_CELL_ADHESION	0.126306	0.0112	4.95813	9.63e-07	8.44e-06	5.13905
GOBP_REGULATION_OF_EXIT_FROM_MITOSIS	-0.118434	-0.014125	-4.9577	9.65e-07	8.44e-06	5.13701
GOBP_REGULATION_OF_GLIAL_CELL_MIGRATION	0.158867	0.00920061	4.9479	1.01e-06	8.83e-06	5.09124
GOBP_NEGATIVE_REGULATION_OF_HUMORAL_IMMUNE_RESPONSE	0.152458	0.0125833	4.94546	1.03e-06	8.92e-06	5.0799
GOBP_POSITIVE_REGULATION_OF_EPIDERMIS_DEVELOPMENT	0.104343	-0.000311389	4.94472	1.03e-06	8.94e-06	5.07643
GOBP_TUMOR_NECROSIS_FACTOR_SUPERFAMILY_CYTOKINE_PRODUCTION	0.108145	0.00327805	4.93914	1.06e-06	9.14e-06	5.05043
GOBP_PROSTATE_GLAND_GROWTH	0.12061	0.0132621	4.93907	1.06e-06	9.14e-06	5.0501
GOBP_REGULATION_OF_ADAPTIVE_IMMUNE_RESPONSE	0.112079	0.000487352	4.93843	1.06e-06	9.15e-06	5.04714
GOCC_PERICENTRIC_HETEROCHROMATIN	-0.14704	-0.0229243	-4.93667	1.07e-06	9.22e-06	5.03893
GOBP_MYELOID_LEUKOCYTE_ACTIVATION	0.112869	-0.000791939	4.9296	1.11e-06	9.52e-06	5.00603
GOBP_SPERMATID_NUCLEUS_DIFFERENTIATION	-0.106006	0.000343975	-4.92845	1.11e-06	9.56e-06	5.0007
GOBP_POSITIVE_REGULATION_OF_ACTIVATED_T_CELL_PROLIFERATION	0.117044	-0.00363907	4.92623	1.13e-06	9.64e-06	4.9904
GOBP_POSITIVE_REGULATION_OF_SYNAPTIC_TRANSMISSION_GABAERGIC	-0.109448	-0.00934265	-4.92332	1.14e-06	9.77e-06	4.97685
GOBP_ANTIMICROBIAL_HUMORAL_IMMUNE_RESPONSE_MEDIATED_BY_ANTIMICROBIAL_PEPTIDE	0.131518	0.0315882	4.92059	1.16e-06	9.88e-06	4.96418
GOBP_NEGATIVE_REGULATION_OF_OXIDATIVE_STRESS_INDUCED_INTRINSIC_APOPTOTIC_SIGNALING_PATHWAY	0.114704	0.00474035	4.92049	1.16e-06	9.88e-06	4.96373
GOBP_REGULATION_OF_HELICASE_ACTIVITY	-0.160095	-0.0168846	-4.91584	1.18e-06	1.01e-05	4.94216
GOMF_RNA_POLYMERASE_CORE_ENZYME_BINDING	-0.122369	-0.024828	-4.91381	1.2e-06	1.02e-05	4.93275
GOBP_DOUBLE_STRAND_BREAK_REPAIR_VIA_NONHOMOLOGOUS_END_JOINING	-0.117679	-0.0252033	-4.9058	1.24e-06	1.05e-05	4.89563
GOMF_AMP_BINDING	0.127442	-0.0059691	4.90493	1.25e-06	1.06e-05	4.89161
GOBP_REGULATION_OF_COLLAGEN_METABOLIC_PROCESS	0.122105	0.00864206	4.90168	1.27e-06	1.07e-05	4.87657
GOMF_PLUS_END_DIRECTED_MICROTUBULE_MOTOR_ACTIVITY	-0.13315	-0.0198854	-4.89839	1.29e-06	1.08e-05	4.86134
GOBP_EPITHELIAL_CELL_MORPHOGENESIS	0.103548	0.00319324	4.89827	1.29e-06	1.08e-05	4.86082
GOMF_SULFURTRANSFERASE_ACTIVITY	0.153742	-0.000564211	4.89548	1.31e-06	1.1e-05	4.84791
GOBP_MONONUCLEAR_CELL_MIGRATION	0.112304	4.49e-05	4.89348	1.32e-06	1.11e-05	4.83867
GOBP_SPERM_MOTILITY	0.107261	0.0128042	4.8906	1.34e-06	1.12e-05	4.82535
GOBP_ANTIGEN_PROCESSING_AND_PRESENTATION_OF_ENDOGENOUS_ANTIGEN	0.180162	0.0067896	4.88819	1.36e-06	1.13e-05	4.81423
GOBP_NUCLEAR_TRANSCRIBED_MRNA_CATABOLIC_PROCESS_NONSENSE_MEDIATED_DECAY	-0.124216	-0.0224811	-4.88778	1.36e-06	1.13e-05	4.81236
GOBP_NEGATIVE_REGULATION_OF_GLYCOLYTIC_PROCESS	0.122744	0.00651031	4.8862	1.37e-06	1.14e-05	4.80506
GOMF_17_BETA_HYDROXYSTEROID_DEHYDROGENASE_NADPPLUS_ACTIVITY	0.124819	0.00347078	4.88495	1.38e-06	1.14e-05	4.79929
GOCC_PLATELET_DENSE_GRANULE	0.11674	0.0116975	4.88346	1.39e-06	1.15e-05	4.79245
GOBP_NEUTROPHIL_DEGRANULATION	0.149795	0.00366954	4.88044	1.41e-06	1.16e-05	4.77854
GOCC_PRP19_COMPLEX	-0.172802	-0.0328805	-4.88024	1.41e-06	1.16e-05	4.77758
GOBP_REGULATION_OF_MACROPHAGE_ACTIVATION	0.117937	0.00277179	4.87803	1.42e-06	1.17e-05	4.7674
GOBP_POSITIVE_REGULATION_OF_HISTONE_METHYLATION	-0.116452	-0.01826	-4.86665	1.5e-06	1.24e-05	4.71507
GOBP_EPITHELIAL_CELL_PROLIFERATION_INVOLVED_IN_PROSTATE_GLAND_DEVELOPMENT	0.124139	-0.00899734	4.86331	1.53e-06	1.26e-05	4.69973
GOBP_POSITIVE_REGULATION_BY_HOST_OF_VIRAL_TRANSCRIPTION	-0.125948	-0.0202176	-4.86271	1.53e-06	1.26e-05	4.69696
GOBP_T_CELL_ACTIVATION	0.102743	0.00147875	4.86268	1.53e-06	1.26e-05	4.69684
GOBP_MEIOTIC_CELL_CYCLE_PHASE_TRANSITION	-0.170792	-0.0129297	-4.86137	1.54e-06	1.26e-05	4.69079
GOBP_RNA_EXPORT_FROM_NUCLEUS	-0.130018	-0.0181102	-4.85872	1.56e-06	1.28e-05	4.67867
GOBP_CHONDROCYTE_DIFFERENTIATION_INVOLVED_IN_ENDOCHONDRAL_BONE_MORPHOGENESIS	0.117575	-0.00236413	4.85869	1.56e-06	1.28e-05	4.67852
GOMF_CHEMOKINE_RECEPTOR_BINDING	0.135806	0.00325801	4.85731	1.57e-06	1.28e-05	4.67221
GOBP_POSITIVE_REGULATION_OF_SYNCYTIUM_FORMATION_BY_PLASMA_MEMBRANE_FUSION	0.125925	-0.00050994	4.85592	1.59e-06	1.29e-05	4.66581
GOBP_NEGATIVE_REGULATION_OF_NATURAL_KILLER_CELL_MEDIATED_IMMUNITY	0.1669	0.00362712	4.85444	1.6e-06	1.3e-05	4.65904
GOBP_POSITIVE_REGULATION_OF_STEM_CELL_POPULATION_MAINTENANCE	-0.132152	-0.00597585	-4.85136	1.62e-06	1.31e-05	4.64492
GOMF_INTRONIC_TRANSCRIPTION_REGULATORY_REGION_SEQUENCE_SPECIFIC_DNA_BINDING	-0.126823	-0.0139222	-4.84958	1.63e-06	1.32e-05	4.63675
GOBP_INTERLEUKIN_1_PRODUCTION	0.111532	0.0065965	4.84619	1.66e-06	1.34e-05	4.62125
GOBP_POSITIVE_REGULATION_OF_INTERLEUKIN_2_PRODUCTION	0.127401	-0.00330969	4.8459	1.66e-06	1.34e-05	4.61989
GOBP_REGULATION_OF_CYTOPLASMIC_TRANSLATION	-0.111775	-0.0110672	-4.84472	1.67e-06	1.35e-05	4.61452
GOBP_POSITIVE_REGULATION_OF_NECROTIC_CELL_DEATH	0.109343	-0.00346478	4.84371	1.68e-06	1.36e-05	4.60987
GOMF_LONG_CHAIN_FATTY_ACID_COA_LIGASE_ACTIVITY	0.100848	-0.00364511	4.8402	1.71e-06	1.38e-05	4.59384
GOBP_CD8_POSITIVE_ALPHA_BETA_T_CELL_DIFFERENTIATION	0.164119	-0.0015735	4.83644	1.74e-06	1.4e-05	4.57663
GOMF_INSULIN_RECEPTOR_BINDING	-0.106394	-0.00343605	-4.83183	1.78e-06	1.43e-05	4.55561
GOMF_DIPEPTIDYL_PEPTIDASE_ACTIVITY	0.111848	0.00603226	4.83147	1.78e-06	1.43e-05	4.55394
GOBP_MAST_CELL_ACTIVATION_INVOLVED_IN_IMMUNE_RESPONSE	0.101694	-0.00283079	4.82573	1.83e-06	1.46e-05	4.52775
GOCC_SIN3_COMPLEX	-0.17316	-0.022083	-4.8239	1.85e-06	1.47e-05	4.51942
GOMF_IMMUNE_RECEPTOR_ACTIVITY	0.135325	0.00855378	4.82031	1.88e-06	1.5e-05	4.50306
GOBP_TRNA_THREONYLCARBAMOYLADENOSINE_METABOLIC_PROCESS	-0.156283	-0.0239783	-4.81711	1.91e-06	1.52e-05	4.4885
GOBP_REGULATION_OF_CHROMATIN_ORGANIZATION	-0.110903	-0.0206542	-4.81515	1.93e-06	1.53e-05	4.47957
GOBP_MITOCHONDRIAL_CYTOCHROME_C_OXIDASE_ASSEMBLY	0.133619	-0.0109139	4.8136	1.94e-06	1.53e-05	4.47249
GOMF_IGG_BINDING	0.19264	0.0320157	4.81284	1.95e-06	1.54e-05	4.46906
GOMF_C_C_CHEMOKINE_BINDING	0.166141	0.0073325	4.80697	2.01e-06	1.58e-05	4.44235
GOBP_T_HELPER_CELL_LINEAGE_COMMITMENT	0.154402	-0.00900664	4.80569	2.02e-06	1.59e-05	4.43654
GOCC_IMMUNOGLOBULIN_COMPLEX	0.204566	-0.00533172	4.80145	2.06e-06	1.62e-05	4.4173
GOBP_REGULATION_OF_MACROPHAGE_CHEMOTAXIS	0.129001	-0.00295051	4.79997	2.07e-06	1.62e-05	4.41058
GOBP_NEGATIVE_REGULATION_OF_RNA_SPLICING	-0.141617	-0.0184736	-4.79894	2.08e-06	1.63e-05	4.4059
GOCC_HISTONE_DEACETYLASE_COMPLEX	-0.103677	-0.022967	-4.79439	2.13e-06	1.66e-05	4.38527
GOBP_NEGATIVE_REGULATION_OF_HISTONE_MODIFICATION	-0.103033	-0.020207	-4.79348	2.14e-06	1.67e-05	4.38113
GOMF_SINGLE_STRANDED_DNA_HELICASE_ACTIVITY	-0.17911	-0.0217957	-4.79032	2.17e-06	1.69e-05	4.36684
GOBP_NEGATIVE_REGULATION_OF_MYELOID_LEUKOCYTE_MEDIATED_IMMUNITY	0.171342	0.0114848	4.78599	2.22e-06	1.72e-05	4.34721
GOBP_PEPTIDYL_LYSINE_TRIMETHYLATION	-0.121741	-0.0162004	-4.78533	2.22e-06	1.72e-05	4.34423
GOMF_SERINE_TYPE_ENDOPEPTIDASE_INHIBITOR_ACTIVITY	0.113647	0.0258554	4.78471	2.23e-06	1.73e-05	4.34145
GOBP_PYRIMIDINE_RIBONUCLEOSIDE_TRIPHOSPHATE_METABOLIC_PROCESS	0.111086	-0.0086309	4.78443	2.23e-06	1.73e-05	4.34018
GOBP_NEGATIVE_REGULATION_OF_MAST_CELL_ACTIVATION	0.150949	0.0128848	4.78174	2.26e-06	1.75e-05	4.328
GOCC_INTEGRIN_COMPLEX	0.123668	6.96e-05	4.77948	2.29e-06	1.76e-05	4.31778
GOMF_HISTONE_BINDING	-0.108583	-0.019245	-4.77868	2.3e-06	1.77e-05	4.31418
GOBP_NATURAL_KILLER_CELL_PROLIFERATION	0.148722	0.000536128	4.77848	2.3e-06	1.77e-05	4.31326
GOBP_AXONEME_ASSEMBLY	0.157619	-0.00956578	4.77808	2.3e-06	1.77e-05	4.31144
GOBP_POSITIVE_REGULATION_OF_TYPE_2_IMMUNE_RESPONSE	0.141818	0.013036	4.77548	2.33e-06	1.79e-05	4.29971
GOBP_RENAL_ABSORPTION	0.11688	0.00524315	4.77194	2.37e-06	1.81e-05	4.28373
GOBP_REGULATION_OF_T_CELL_PROLIFERATION	0.114087	8.12e-05	4.77066	2.39e-06	1.82e-05	4.27796
GOBP_ANTIGEN_RECEPTOR_MEDIATED_SIGNALING_PATHWAY	0.109413	-0.00628546	4.76897	2.4e-06	1.83e-05	4.27033
GOBP_NEGATIVE_REGULATION_OF_IMMUNE_EFFECTOR_PROCESS	0.111984	0.00804182	4.76684	2.43e-06	1.85e-05	4.26073
GOMF_GDP_BINDING	-0.111539	-0.00895713	-4.76377	2.46e-06	1.87e-05	4.24689
GOBP_MEMBRANE_RAFT_ORGANIZATION	0.106391	-0.00237638	4.75997	2.51e-06	1.9e-05	4.22974
GOBP_NATURAL_KILLER_CELL_ACTIVATION	0.100253	0.013761	4.75194	2.61e-06	1.96e-05	4.19366
GOMF_ATP_HYDROLYSIS_ACTIVITY	-0.102296	-0.0188624	-4.7462	2.68e-06	2.01e-05	4.16783
GOBP_REGULATION_OF_LIPOPROTEIN_LIPASE_ACTIVITY	0.102151	0.0167499	4.74061	2.75e-06	2.06e-05	4.14275
GOBP_MACROPHAGE_CHEMOTAXIS	0.112246	-0.00125729	4.73814	2.78e-06	2.08e-05	4.13168
GOMF_DNA_HELICASE_ACTIVITY	-0.139765	-0.0286135	-4.73807	2.78e-06	2.08e-05	4.13137
GOBP_ENDOSOME_TO_PLASMA_MEMBRANE_PROTEIN_TRANSPORT	-0.117321	-0.0177843	-4.73681	2.8e-06	2.09e-05	4.1257
GOBP_SUCKLING_BEHAVIOR	-0.115227	-0.0129164	-4.73479	2.83e-06	2.11e-05	4.11664
GOBP_HISTONE_H3_ACETYLATION	-0.104896	-0.0234946	-4.73435	2.83e-06	2.11e-05	4.11469
GOBP_KILLING_OF_CELLS_OF_ANOTHER_ORGANISM	0.118042	0.0360612	4.73044	2.89e-06	2.15e-05	4.09717
GOBP_REGULATION_OF_LEUKOCYTE_MEDIATED_IMMUNITY	0.109574	0.000804288	4.72974	2.9e-06	2.15e-05	4.09402
GOBP_HISTONE_H3_K9_ACETYLATION	-0.103847	-0.035542	-4.72716	2.93e-06	2.17e-05	4.08248
GOMF_MUSCLE_ALPHA_ACTININ_BINDING	0.12882	0.00549204	4.72711	2.93e-06	2.17e-05	4.08227
GOBP_REGULATION_OF_CD8_POSITIVE_ALPHA_BETA_T_CELL_ACTIVATION	0.158947	0.00815487	4.72672	2.94e-06	2.17e-05	4.08052
GOCC_PRESYNAPTIC_ACTIVE_ZONE_CYTOPLASMIC_COMPONENT	-0.107793	-0.0099222	-4.72602	2.95e-06	2.17e-05	4.0774
GOCC_SPANNING_COMPONENT_OF_PLASMA_MEMBRANE	0.112126	0.0149452	4.726	2.95e-06	2.17e-05	4.07728
GOBP_EYELID_DEVELOPMENT_IN_CAMERA_TYPE_EYE	-0.118321	-0.00603875	-4.72512	2.96e-06	2.18e-05	4.07335
GOBP_CELL_SURFACE_RECEPTOR_SIGNALING_PATHWAY_INVOLVED_IN_HEART_DEVELOPMENT	0.116435	0.000979597	4.72425	2.97e-06	2.19e-05	4.06945
GOBP_TETRAHYDROFOLATE_METABOLIC_PROCESS	-0.132684	-0.0351732	-4.72225	3e-06	2.2e-05	4.06054
GOBP_RNA_LOCALIZATION	-0.114744	-0.0174667	-4.72039	3.03e-06	2.22e-05	4.05221
GOMF_DYNEIN_HEAVY_CHAIN_BINDING	0.145714	-0.0018101	4.71964	3.04e-06	2.22e-05	4.04886
GOMF_DOUBLE_STRANDED_RNA_BINDING	-0.106905	-0.0126896	-4.71748	3.07e-06	2.24e-05	4.03923
GOBP_PLANAR_CELL_POLARITY_PATHWAY_INVOLVED_IN_NEURAL_TUBE_CLOSURE	-0.132112	-0.0141258	-4.71644	3.08e-06	2.25e-05	4.03458
GOBP_REGULATION_OF_DNA_METHYLATION_DEPENDENT_HETEROCHROMATIN_ASSEMBLY	-0.111239	-0.0122519	-4.71523	3.1e-06	2.26e-05	4.02917
GOBP_CALCIUM_MEDIATED_SIGNALING_USING_INTRACELLULAR_CALCIUM_SOURCE	0.104238	0.00498619	4.70934	3.19e-06	2.32e-05	4.0029
GOBP_T_CELL_PROLIFERATION	0.106351	-0.00151858	4.70818	3.21e-06	2.33e-05	3.99773
GOBP_REGULATION_OF_MEMBRANE_INVAGINATION	0.132474	0.00706522	4.70675	3.23e-06	2.34e-05	3.99132
GOBP_PYRIMIDINE_DEOXYRIBONUCLEOSIDE_MONOPHOSPHATE_METABOLIC_PROCESS	0.115353	-0.0105327	4.70487	3.26e-06	2.36e-05	3.98295
GOBP_NEGATIVE_REGULATION_OF_VOLTAGE_GATED_POTASSIUM_CHANNEL_ACTIVITY	0.131659	0.0279393	4.70403	3.27e-06	2.36e-05	3.97921
GOBP_LATERAL_SPROUTING_FROM_AN_EPITHELIUM	0.137415	0.0173296	4.70397	3.27e-06	2.36e-05	3.97894
GOBP_ANTIGEN_PROCESSING_AND_PRESENTATION_OF_EXOGENOUS_PEPTIDE_ANTIGEN_VIA_MHC_CLASS_II	0.172761	0.00827871	4.70193	3.3e-06	2.38e-05	3.96989
GOBP_REGULATION_OF_CHROMATIN_ASSEMBLY_OR_DISASSEMBLY	-0.102391	-0.0156018	-4.69815	3.36e-06	2.42e-05	3.95306
GOBP_MYELOID_DENDRITIC_CELL_ACTIVATION	0.132131	-0.0077768	4.69745	3.37e-06	2.43e-05	3.94994
GOBP_POSITIVE_REGULATION_OF_T_CELL_MEDIATED_CYTOTOXICITY	0.151874	0.006922	4.69504	3.41e-06	2.45e-05	3.9392
GOBP_REGULATION_OF_T_CELL_ACTIVATION	0.103233	-0.000860843	4.6948	3.41e-06	2.45e-05	3.93813
GOBP_NEGATIVE_REGULATION_OF_NEUROINFLAMMATORY_RESPONSE	0.150717	0.00573874	4.69458	3.42e-06	2.45e-05	3.93715
GOCC_ER_TO_GOLGI_TRANSPORT_VESICLE_MEMBRANE	0.112787	-0.000370122	4.69403	3.43e-06	2.45e-05	3.93472
GOBP_AV_NODE_CELL_TO_BUNDLE_OF_HIS_CELL_COMMUNICATION	0.134743	0.00688215	4.69384	3.43e-06	2.45e-05	3.93387
GOMF_HELICASE_ACTIVITY	-0.12412	-0.0220242	-4.69143	3.47e-06	2.48e-05	3.92316
GOBP_ACUTE_INFLAMMATORY_RESPONSE	0.108793	0.0135301	4.68995	3.49e-06	2.49e-05	3.91658
GOBP_NEGATIVE_REGULATION_OF_ANTIGEN_RECEPTOR_MEDIATED_SIGNALING_PATHWAY	0.118565	-0.00795365	4.68629	3.55e-06	2.53e-05	3.90033
GOCC_FASCIA_ADHERENS	-0.136401	-0.0103871	-4.68278	3.61e-06	2.57e-05	3.88475
GOBP_CHRONIC_INFLAMMATORY_RESPONSE	0.153977	0.00605581	4.6805	3.65e-06	2.6e-05	3.87463
GOBP_CILIUM_OR_FLAGELLUM_DEPENDENT_CELL_MOTILITY	0.112263	0.00832643	4.67953	3.67e-06	2.61e-05	3.87034
GOMF_INTRAMOLECULAR_TRANSFERASE_ACTIVITY_PHOSPHOTRANSFERASES	0.138412	-0.000219574	4.6774	3.7e-06	2.63e-05	3.86091
GOBP_AXONEMAL_DYNEIN_COMPLEX_ASSEMBLY	0.174722	-0.0127774	4.67577	3.73e-06	2.64e-05	3.8537
GOBP_3_PHOSPHOADENOSINE_5_PHOSPHOSULFATE_METABOLIC_PROCESS	0.100721	0.00991965	4.67399	3.76e-06	2.66e-05	3.8458
GOBP_POSITIVE_REGULATION_OF_IMMUNE_EFFECTOR_PROCESS	0.101811	0.00113897	4.6733	3.78e-06	2.67e-05	3.84273
GOBP_POSITIVE_REGULATION_OF_MACROPHAGE_ACTIVATION	0.11914	0.000730508	4.67164	3.8e-06	2.69e-05	3.83542
GOBP_NK_T_CELL_DIFFERENTIATION	0.14028	-0.00179691	4.66622	3.9e-06	2.75e-05	3.81144
GOMF_GLUTATHIONE_TRANSFERASE_ACTIVITY	0.116149	-0.00184205	4.66604	3.91e-06	2.75e-05	3.81063
GOBP_POSITIVE_REGULATION_OF_ADAPTIVE_IMMUNE_RESPONSE	0.108467	-0.00383637	4.66339	3.95e-06	2.78e-05	3.79891
GOBP_NEGATIVE_REGULATION_OF_OSTEOBLAST_PROLIFERATION	-0.117111	-0.00269272	-4.66222	3.98e-06	2.79e-05	3.79373
GOBP_REGULATION_OF_IMMUNE_EFFECTOR_PROCESS	0.100104	0.00294507	4.66054	4.01e-06	2.81e-05	3.78632
GOMF_POLY_PURINE_TRACT_BINDING	-0.110312	-0.0159669	-4.66015	4.01e-06	2.81e-05	3.78461
GOBP_REGULATION_OF_UNSATURATED_FATTY_ACID_BIOSYNTHETIC_PROCESS	0.109361	0.0165251	4.6571	4.07e-06	2.85e-05	3.77113
GOBP_RESPIRATORY_CHAIN_COMPLEX_IV_ASSEMBLY	0.131498	-0.00789802	4.65581	4.1e-06	2.86e-05	3.76542
GOBP_POSITIVE_REGULATION_OF_HUMORAL_IMMUNE_RESPONSE	0.146035	0.0333432	4.64947	4.22e-06	2.93e-05	3.73746
GOBP_DOUBLE_STRAND_BREAK_REPAIR	-0.114877	-0.0218506	-4.64913	4.23e-06	2.93e-05	3.73599
GOBP_NEGATIVE_REGULATION_OF_MRNA_SPLICING_VIA_SPLICEOSOME	-0.144782	-0.0216829	-4.64756	4.26e-06	2.95e-05	3.72906
GOMF_IMMUNOGLOBULIN_BINDING	0.153327	0.024979	4.64502	4.31e-06	2.98e-05	3.71789
GOBP_NEGATIVE_REGULATION_OF_TOLL_LIKE_RECEPTOR_SIGNALING_PATHWAY	0.100119	-0.013955	4.64419	4.32e-06	2.98e-05	3.71424
GOBP_HEAT_GENERATION	0.129231	0.0113803	4.64339	4.34e-06	2.99e-05	3.71072
GOBP_T_HELPER_17_CELL_DIFFERENTIATION	0.117864	-0.00336917	4.64327	4.34e-06	2.99e-05	3.71016
GOBP_CD40_SIGNALING_PATHWAY	0.111997	-0.0159544	4.64246	4.36e-06	3e-05	3.7066
GOBP_REGULATION_OF_NATURAL_KILLER_CELL_ACTIVATION	0.114176	-4.48e-05	4.642	4.37e-06	3e-05	3.7046
GOBP_HUMORAL_IMMUNE_RESPONSE	0.110747	0.0269266	4.6408	4.39e-06	3.01e-05	3.69928
GOBP_REGULATION_OF_LEUKOCYTE_DEGRANULATION	0.115903	-0.00393484	4.63993	4.41e-06	3.02e-05	3.69548
GOCC_TERTIARY_GRANULE_MEMBRANE	0.115887	-0.000160878	4.63965	4.42e-06	3.02e-05	3.69423
GOBP_SYNAPTIC_VESICLE_MATURATION	-0.110742	-0.00506843	-4.63943	4.42e-06	3.02e-05	3.69326
GOBP_NEGATIVE_REGULATION_OF_NEURON_PROJECTION_REGENERATION	-0.105126	-0.00655862	-4.63588	4.49e-06	3.05e-05	3.67766
GOBP_POSITIVE_REGULATION_OF_CYTOSOLIC_CALCIUM_ION_CONCENTRATION_INVOLVED_IN_PHOSPHOLIPASE_C_ACTIVATING_G_PROTEIN_COUPLED_SIGNALING_PATHWAY	0.112752	0.0174278	4.63028	4.61e-06	3.12e-05	3.65308
GOCC_COPII_COATED_ER_TO_GOLGI_TRANSPORT_VESICLE	0.101089	-0.00191617	4.62403	4.75e-06	3.21e-05	3.62566
GOCC_SPECIFIC_GRANULE_MEMBRANE	0.107792	-0.00216949	4.61778	4.89e-06	3.29e-05	3.59825
GOBP_REGULATION_OF_SYNAPTIC_VESICLE_ENDOCYTOSIS	-0.10163	-0.0151349	-4.61738	4.9e-06	3.29e-05	3.59651
GOMF_LOW_DENSITY_LIPOPROTEIN_PARTICLE_BINDING	0.110221	0.0125231	4.61288	5e-06	3.35e-05	3.57679
GOBP_POSITIVE_REGULATION_OF_MONONUCLEAR_CELL_MIGRATION	0.105216	-0.00306866	4.61249	5.01e-06	3.35e-05	3.57509
GOBP_B_CELL_PROLIFERATION	0.105519	0.0148774	4.61237	5.01e-06	3.35e-05	3.57458
GOBP_NEGATIVE_REGULATION_OF_MRNA_PROCESSING	-0.135812	-0.0209249	-4.60972	5.07e-06	3.39e-05	3.56301
GOCC_COSTAMERE	-0.120673	-0.0107479	-4.60891	5.09e-06	3.4e-05	3.55947
GOBP_POSITIVE_REGULATION_OF_PRODUCTION_OF_MIRNAS_INVOLVED_IN_GENE_SILENCING_BY_MIRNA	0.103511	0.0196836	4.60822	5.11e-06	3.4e-05	3.55641
GOBP_LYMPH_NODE_DEVELOPMENT	0.10771	0.0081286	4.60727	5.13e-06	3.41e-05	3.55227
GOBP_REGULATION_OF_RNA_SPLICING	-0.102124	-0.012904	-4.6052	5.18e-06	3.44e-05	3.54325
GOCC_PARALLEL_FIBER_TO_PURKINJE_CELL_SYNAPSE	-0.118509	0.0200072	-4.60479	5.19e-06	3.44e-05	3.54146
GOBP_REGULATION_OF_MRNA_POLYADENYLATION	-0.126093	-0.0146627	-4.60476	5.19e-06	3.44e-05	3.54132
GOBP_LEUKOCYTE_DEGRANULATION	0.113052	-0.0014463	4.60325	5.23e-06	3.46e-05	3.5347
GOMF_TOLL_LIKE_RECEPTOR_BINDING	0.13726	0.00276673	4.60125	5.28e-06	3.49e-05	3.52597
GOBP_MAST_CELL_ACTIVATION	0.104872	-0.00218377	4.59458	5.44e-06	3.58e-05	3.4969
GOMF_RNA_STEM_LOOP_BINDING	-0.137648	-0.0143099	-4.58884	5.59e-06	3.67e-05	3.4719
GOBP_REGULATION_OF_PIGMENTATION	0.112059	-0.00639767	4.58855	5.59e-06	3.67e-05	3.47061
GOMF_CARD_DOMAIN_BINDING	0.121426	0.0120902	4.58643	5.65e-06	3.7e-05	3.46141
GOBP_NEGATIVE_REGULATION_OF_B_CELL_MEDIATED_IMMUNITY	0.123611	0.00483163	4.58485	5.69e-06	3.72e-05	3.45454
GOBP_ANTIGEN_PROCESSING_AND_PRESENTATION_OF_PEPTIDE_ANTIGEN	0.145872	0.00620098	4.58321	5.73e-06	3.73e-05	3.44739
GOBP_PURINE_NUCLEOBASE_BIOSYNTHETIC_PROCESS	-0.159888	-0.0328427	-4.57033	6.08e-06	3.94e-05	3.39143
GOBP_QUATERNARY_AMMONIUM_GROUP_TRANSPORT	0.106891	0.000290085	4.56927	6.11e-06	3.95e-05	3.38683
GOBP_REGULATION_OF_FIBRINOLYSIS	0.125579	0.00673514	4.56771	6.16e-06	3.97e-05	3.38009
GOCC_SPERM_CONNECTING_PIECE	0.119986	0.0303374	4.56641	6.19e-06	3.99e-05	3.37446
GOBP_POSITIVE_REGULATION_OF_TRANSCRIPTION_BY_RNA_POLYMERASE_I	-0.131281	-0.0276508	-4.56625	6.2e-06	3.99e-05	3.37375
GOMF_ATP_DEPENDENT_ACTIVITY_ACTING_ON_DNA	-0.133613	-0.024529	-4.56448	6.25e-06	4.01e-05	3.36608
GOBP_CONVERGENT_EXTENSION	-0.11695	-0.0129462	-4.56187	6.32e-06	4.05e-05	3.35477
GOBP_LEUKOCYTE_CELL_CELL_ADHESION	0.102064	0.000327565	4.56031	6.37e-06	4.07e-05	3.34802
GOCC_MITOTIC_SPINDLE_POLE	-0.123113	-0.0176649	-4.55831	6.43e-06	4.1e-05	3.33937
GOBP_PEPTIDYL_LYSINE_METHYLATION	-0.100212	-0.0183806	-4.55825	6.43e-06	4.1e-05	3.33912
GOMF_ANTIGEN_BINDING	0.146707	0.00457137	4.55611	6.49e-06	4.13e-05	3.32985
GOBP_COMMISSURAL_NEURON_AXON_GUIDANCE	-0.11339	-0.0124409	-4.55552	6.51e-06	4.14e-05	3.32728
GOBP_LACTATE_METABOLIC_PROCESS	0.103191	-0.000337031	4.55401	6.55e-06	4.16e-05	3.32078
GOBP_POSITIVE_REGULATION_OF_INTERLEUKIN_4_PRODUCTION	0.151677	-0.00420145	4.55387	6.56e-06	4.16e-05	3.32014
GOBP_NEGATIVE_REGULATION_OF_NUCLEAR_DIVISION	-0.11716	-0.0182237	-4.551	6.65e-06	4.21e-05	3.30776
GOBP_REGULATION_OF_SYNCYTIUM_FORMATION_BY_PLASMA_MEMBRANE_FUSION	0.109798	-0.00137009	4.5499	6.68e-06	4.23e-05	3.30298
GOBP_REGULATION_OF_PROTEIN_LOCALIZATION_TO_CENTROSOME	-0.140129	-0.0266755	-4.54967	6.69e-06	4.23e-05	3.30199
GOBP_ESTABLISHMENT_OF_PLANAR_POLARITY_OF_EMBRYONIC_EPITHELIUM	-0.113976	-0.0152913	-4.54279	6.9e-06	4.35e-05	3.27229
GOBP_POSITIVE_REGULATION_OF_INFLAMMATORY_RESPONSE_TO_ANTIGENIC_STIMULUS	0.166309	0.00488588	4.54104	6.95e-06	4.38e-05	3.26477
GOCC_SPERM_PRINCIPAL_PIECE	0.109192	0.0268149	4.53887	7.02e-06	4.42e-05	3.2554
GOBP_ALPHA_BETA_T_CELL_PROLIFERATION	0.133531	0.000734192	4.53754	7.07e-06	4.44e-05	3.24969
GOMF_DNA_REPLICATION_ORIGIN_BINDING	-0.170126	-0.0275736	-4.53712	7.08e-06	4.45e-05	3.24788
GOBP_INTERLEUKIN_13_PRODUCTION	0.108103	0.00872241	4.534	7.18e-06	4.49e-05	3.23441
GOMF_OXYGEN_CARRIER_ACTIVITY	0.139618	0.0544635	4.53321	7.21e-06	4.5e-05	3.23104
GOMF_SUMO_BINDING	-0.120556	-0.0224305	-4.53104	7.28e-06	4.54e-05	3.22167
GOBP_HISTONE_H3_K9_METHYLATION	-0.103742	-0.0182191	-4.52902	7.35e-06	4.57e-05	3.21299
GOBP_DNA_CONFORMATION_CHANGE	-0.107233	-0.0181275	-4.52891	7.35e-06	4.57e-05	3.21253
GOBP_ANTIGEN_PROCESSING_AND_PRESENTATION	0.128068	0.00203171	4.52756	7.4e-06	4.59e-05	3.20672
GOBP_POSITIVE_REGULATION_OF_MACROPHAGE_MIGRATION	0.13015	0.00422926	4.52585	7.45e-06	4.62e-05	3.19936
GOBP_REGULATION_OF_HISTONE_H3_K9_METHYLATION	-0.102404	-0.020297	-4.52225	7.58e-06	4.7e-05	3.18388
GOMF_OXIDIZED_DNA_BINDING	-0.14402	-0.0306162	-4.52066	7.63e-06	4.72e-05	3.17704
GOBP_REGULATION_OF_HISTONE_H3_K4_METHYLATION	-0.107307	-0.0165256	-4.51984	7.66e-06	4.74e-05	3.17352
GOCC_SERINE_TYPE_PEPTIDASE_COMPLEX	0.129485	0.0323853	4.51972	7.66e-06	4.74e-05	3.17304
GOBP_NUCLEOBASE_BIOSYNTHETIC_PROCESS	-0.142538	-0.0276589	-4.51563	7.81e-06	4.81e-05	3.15547
GOCC_TRAPP_COMPLEX	0.108905	-0.00758324	4.50897	8.05e-06	4.95e-05	3.1269
GOBP_NEGATIVE_REGULATION_OF_HIPPO_SIGNALING	-0.138616	-0.022288	-4.50669	8.13e-06	5e-05	3.11714
GOMF_CXCR_CHEMOKINE_RECEPTOR_BINDING	0.148642	0.00926702	4.5053	8.18e-06	5.02e-05	3.11119
GOBP_ANTIGEN_PROCESSING_AND_PRESENTATION_OF_EXOGENOUS_PEPTIDE_ANTIGEN	0.156217	0.00677836	4.50344	8.25e-06	5.06e-05	3.10324
GOBP_REGULATION_OF_ANTIGEN_RECEPTOR_MEDIATED_SIGNALING_PATHWAY	0.112874	-0.00805852	4.49818	8.45e-06	5.17e-05	3.08073
GOBP_DNA_GEOMETRIC_CHANGE	-0.133381	-0.0239786	-4.49801	8.46e-06	5.17e-05	3.08002
GOBP_NEGATIVE_REGULATION_OF_CHOLESTEROL_STORAGE	0.124805	-0.00653749	4.49585	8.54e-06	5.21e-05	3.07078
GOBP_DEFENSE_RESPONSE_TO_GRAM_NEGATIVE_BACTERIUM	0.105876	0.0233379	4.49284	8.66e-06	5.28e-05	3.05791
GOCC_ZYMOGEN_GRANULE_MEMBRANE	0.10941	0.0353666	4.48933	8.8e-06	5.35e-05	3.04293
GOBP_SPLICEOSOMAL_COMPLEX_ASSEMBLY	-0.113502	-0.0191494	-4.48846	8.83e-06	5.37e-05	3.03924
GOBP_MONOACYLGLYCEROL_METABOLIC_PROCESS	0.121712	0.00182729	4.48703	8.89e-06	5.4e-05	3.03314
GOBP_POSITIVE_REGULATION_OF_VIRAL_LIFE_CYCLE	0.100544	-0.00491543	4.48644	8.91e-06	5.4e-05	3.03062
GOBP_REGULATION_OF_NK_T_CELL_ACTIVATION	0.127477	-0.00419168	4.48615	8.92e-06	5.4e-05	3.02938
GOBP_REGULATION_OF_MRNA_SPLICING_VIA_SPLICEOSOME	-0.106367	-0.0111538	-4.48197	9.09e-06	5.5e-05	3.01158
GOBP_REGULATION_OF_LEUKOCYTE_TETHERING_OR_ROLLING	0.135958	0.00493585	4.48067	9.15e-06	5.52e-05	3.00604
GOBP_RECOMBINATIONAL_REPAIR	-0.118388	-0.0214035	-4.4771	9.29e-06	5.61e-05	2.99084
GOMF_PEPTIDOGLYCAN_BINDING	0.128387	0.0355441	4.47414	9.42e-06	5.67e-05	2.97825
GOBP_CYTOLYSIS	0.125192	0.0169879	4.47181	9.52e-06	5.73e-05	2.96831
GOBP_NEGATIVE_REGULATION_OF_HUMORAL_IMMUNE_RESPONSE_MEDIATED_BY_CIRCULATING_IMMUNOGLOBULIN	0.148155	0.0113724	4.4711	9.55e-06	5.74e-05	2.96532
GOBP_REGULATION_OF_ACUTE_INFLAMMATORY_RESPONSE	0.120596	0.00923699	4.47095	9.56e-06	5.74e-05	2.96469
GOBP_NUCLEOSOME_ASSEMBLY	-0.114225	-0.0201731	-4.47037	9.58e-06	5.75e-05	2.96219
GOBP_LEUKOTRIENE_BIOSYNTHETIC_PROCESS	0.116615	0.0153769	4.46728	9.72e-06	5.82e-05	2.94907
GOBP_POSITIVE_REGULATION_OF_TOLL_LIKE_RECEPTOR_SIGNALING_PATHWAY	0.101315	-0.00196573	4.46603	9.77e-06	5.84e-05	2.94377
GOBP_REGULATION_OF_LEUKOCYTE_PROLIFERATION	0.10438	-4.81e-05	4.466	9.77e-06	5.84e-05	2.94365
GOBP_MATURE_B_CELL_DIFFERENTIATION	0.114917	0.015302	4.46527	9.8e-06	5.85e-05	2.94053
GOBP_T_CELL_CYTOKINE_PRODUCTION	0.116245	0.0118605	4.46328	9.89e-06	5.9e-05	2.93209
GOBP_NEGATIVE_REGULATION_OF_ENDOPLASMIC_RETICULUM_STRESS_INDUCED_INTRINSIC_APOPTOTIC_SIGNALING_PATHWAY	0.118048	-0.00442477	4.46283	9.91e-06	5.9e-05	2.9302
GOBP_POSITIVE_REGULATION_OF_DNA_METHYLATION_DEPENDENT_HETEROCHROMATIN_ASSEMBLY	-0.131604	-0.0220171	-4.45747	1.02e-05	6.03e-05	2.90746
GOBP_MITOCHONDRIAL_RNA_PROCESSING	-0.146486	-0.0311939	-4.45325	1.03e-05	6.14e-05	2.88958
GOBP_MITOTIC_CHROMOSOME_CONDENSATION	-0.152501	-0.0348813	-4.45228	1.04e-05	6.16e-05	2.88545
GOCC_PLATELET_DENSE_GRANULE_LUMEN	0.12919	0.0231655	4.44927	1.05e-05	6.23e-05	2.87273
GOBP_TOLERANCE_INDUCTION	0.138076	0.00824818	4.44628	1.07e-05	6.31e-05	2.86009
GOBP_PROSTAGLANDIN_TRANSPORT	0.114566	0.0117211	4.44521	1.07e-05	6.33e-05	2.85554
GOBP_NEGATIVE_REGULATION_OF_B_CELL_ACTIVATION	0.118694	-0.00169311	4.44167	1.09e-05	6.41e-05	2.84059
GOBP_POSITIVE_REGULATION_OF_CELL_MIGRATION_INVOLVED_IN_SPROUTING_ANGIOGENESIS	0.113072	-0.00382891	4.43228	1.14e-05	6.66e-05	2.80096
GOBP_ACTIVATION_OF_NF_KAPPAB_INDUCING_KINASE_ACTIVITY	0.101333	-0.00835832	4.43156	1.14e-05	6.66e-05	2.79793
GOMF_POLY_A_BINDING	-0.104926	-0.0161099	-4.43143	1.14e-05	6.66e-05	2.79738
GOBP_POSITIVE_REGULATION_OF_CHROMATIN_ORGANIZATION	-0.122992	-0.0201687	-4.43132	1.14e-05	6.66e-05	2.79689
GOMF_ATP_DEPENDENT_ACTIVITY_ACTING_ON_RNA	-0.111542	-0.0204292	-4.42539	1.17e-05	6.82e-05	2.77194
GOBP_MYELOID_CELL_ACTIVATION_INVOLVED_IN_IMMUNE_RESPONSE	0.109163	-0.00208629	4.41793	1.21e-05	7.04e-05	2.74054
GOCC_MICROVILLUS_MEMBRANE	0.108408	0.00590216	4.41557	1.22e-05	7.1e-05	2.7306
GOBP_EOSINOPHIL_CHEMOTAXIS	0.141948	0.00427323	4.40752	1.27e-05	7.33e-05	2.69683
GOBP_T_CELL_SELECTION	0.131929	-0.00393789	4.40551	1.28e-05	7.39e-05	2.68838
GOBP_REGULATION_OF_RESPONSE_TO_TUMOR_CELL	0.109926	-0.0042151	4.40403	1.29e-05	7.43e-05	2.68218
GOCC_LATERAL_ELEMENT	-0.142113	-0.0150448	-4.40329	1.29e-05	7.45e-05	2.67908
GOBP_POSITIVE_REGULATION_OF_EXTRINSIC_APOPTOTIC_SIGNALING_PATHWAY_VIA_DEATH_DOMAIN_RECEPTORS	-0.112403	0.000652408	-4.40297	1.3e-05	7.45e-05	2.67773
GOBP_FACULTATIVE_HETEROCHROMATIN_ASSEMBLY	-0.105039	-0.0150296	-4.40292	1.3e-05	7.45e-05	2.67756
GOMF_ANKYRIN_BINDING	-0.102578	-0.00372507	-4.39816	1.32e-05	7.6e-05	2.65761
GOBP_POSITIVE_REGULATION_OF_GONAD_DEVELOPMENT	-0.110026	0.00676607	-4.39795	1.32e-05	7.6e-05	2.65672
GOBP_MRNA_CIS_SPLICING_VIA_SPLICEOSOME	-0.131325	-0.0296415	-4.3976	1.33e-05	7.6e-05	2.65525
GOCC_AXONEMAL_DYNEIN_COMPLEX	0.166922	-0.00605086	4.39609	1.34e-05	7.64e-05	2.64895
GOBP_POSITIVE_REGULATION_OF_VIRAL_GENOME_REPLICATION	-0.109273	-0.0170034	-4.396	1.34e-05	7.64e-05	2.64856
GOBP_POSITIVE_REGULATION_OF_INTERLEUKIN_10_PRODUCTION	0.112828	-0.0040261	4.39556	1.34e-05	7.64e-05	2.64673
GOBP_PROTEIN_DNA_COMPLEX_SUBUNIT_ORGANIZATION	-0.102264	-0.0182265	-4.39083	1.37e-05	7.77e-05	2.62694
GOMF_ACTIVIN_ACTIVATED_RECEPTOR_ACTIVITY	-0.124759	-0.00738098	-4.38732	1.39e-05	7.87e-05	2.61227
GOBP_INTERLEUKIN_12_PRODUCTION	0.119316	-0.000640602	4.38572	1.4e-05	7.91e-05	2.60558
GOBP_MODULATION_OF_PROCESS_OF_ANOTHER_ORGANISM	0.128956	0.0368676	4.38497	1.4e-05	7.93e-05	2.60247
GOMF_NUCLEAR_LOCALIZATION_SEQUENCE_BINDING	-0.115669	-0.0175452	-4.38142	1.43e-05	8.02e-05	2.58765
GOBP_POSITIVE_REGULATION_OF_MYOTUBE_DIFFERENTIATION	-0.101547	-0.00483902	-4.3723	1.48e-05	8.32e-05	2.54962
GOBP_PEPTIDYL_PROLINE_HYDROXYLATION	0.128212	-0.011993	4.37062	1.49e-05	8.37e-05	2.54264
GOBP_RESPONSE_TO_PEPTIDOGLYCAN	0.132529	0.00513897	4.36926	1.5e-05	8.41e-05	2.53697
GOBP_NEGATIVE_REGULATION_BY_HOST_OF_VIRAL_TRANSCRIPTION	-0.105028	-0.0272249	-4.36594	1.53e-05	8.51e-05	2.52318
GOBP_HISTAMINE_SECRETION	0.111614	-0.00108529	4.36415	1.54e-05	8.56e-05	2.51572
GOBP_ACTIN_FILAMENT_NETWORK_FORMATION	0.102245	-0.023485	4.36117	1.56e-05	8.64e-05	2.50336
GOCC_POST_MRNA_RELEASE_SPLICEOSOMAL_COMPLEX	-0.131435	-0.0339403	-4.36007	1.57e-05	8.67e-05	2.49876
GOBP_REGULATION_OF_RELAXATION_OF_MUSCLE	0.114486	0.0184425	4.35864	1.58e-05	8.71e-05	2.49282
GOBP_RESPONSE_TO_STIMULUS_INVOLVED_IN_REGULATION_OF_MUSCLE_ADAPTATION	-0.102846	-0.00430488	-4.35601	1.59e-05	8.8e-05	2.48194
GOMF_5_3_EXONUCLEASE_ACTIVITY	-0.121861	-0.0261008	-4.35555	1.6e-05	8.81e-05	2.48001
GOBP_REGULATION_OF_DENDRITIC_SPINE_MAINTENANCE	-0.114094	0.00830185	-4.34569	1.67e-05	9.17e-05	2.43914
GOBP_POSITIVE_REGULATION_OF_T_CELL_MEDIATED_IMMUNITY	0.113358	-0.000683584	4.34453	1.68e-05	9.21e-05	2.43433
GOBP_SUPEROXIDE_ANION_GENERATION	0.100551	0.0127231	4.33409	1.76e-05	9.57e-05	2.39118
GOBP_POSITIVE_REGULATION_OF_CELL_CYCLE_G2_M_PHASE_TRANSITION	-0.118182	-0.0221384	-4.33363	1.76e-05	9.58e-05	2.38926
GOBP_TRANS_SYNAPTIC_SIGNALING_MODULATING_SYNAPTIC_TRANSMISSION	-0.100316	0.0269661	-4.33285	1.77e-05	9.61e-05	2.38608
GOBP_REGULATION_OF_CD4_POSITIVE_ALPHA_BETA_T_CELL_ACTIVATION	0.103319	-0.00250542	4.33057	1.78e-05	9.68e-05	2.37663
GOBP_GAP_JUNCTION_ASSEMBLY	0.12212	0.0136124	4.32842	1.8e-05	9.75e-05	2.3678
GOBP_MICROGLIAL_CELL_ACTIVATION	0.115676	0.00138159	4.32508	1.83e-05	9.86e-05	2.35402
GOBP_BEHAVIORAL_RESPONSE_TO_PAIN	0.105859	0.00605596	4.32241	1.85e-05	9.95e-05	2.34298
GOCC_SAGA_TYPE_COMPLEX	-0.12195	-0.0169575	-4.31909	1.88e-05	0.00010072	2.32934
GOMF_STAT_FAMILY_PROTEIN_BINDING	-0.11171	-0.0075242	-4.31703	1.89e-05	0.000101551	2.32085
GOBP_HISTONE_EXCHANGE	-0.112882	-0.00991402	-4.31339	1.92e-05	0.000103012	2.3059
GOBP_LYMPHOCYTE_CHEMOTAXIS	0.116799	-0.00151617	4.31267	1.93e-05	0.000103253	2.30292
GOMF_ANNEALING_ACTIVITY	-0.145638	-0.0313031	-4.31249	1.93e-05	0.000103253	2.30219
GOBP_REGULATION_OF_NAD_P_H_OXIDASE_ACTIVITY	0.10266	0.0213921	4.31183	1.94e-05	0.000103472	2.29945
GOBP_TRANSFORMING_GROWTH_FACTOR_BETA_ACTIVATION	-0.119675	-0.0194483	-4.30721	1.97e-05	0.000105408	2.2805
GOMF_H4_HISTONE_ACETYLTRANSFERASE_ACTIVITY	-0.128494	-0.0195438	-4.30176	2.02e-05	0.000107775	2.25811
GOMF_DNA_SECONDARY_STRUCTURE_BINDING	-0.128112	-0.0192747	-4.29542	2.08e-05	0.000110353	2.23213
GOBP_NATURAL_KILLER_CELL_ACTIVATION_INVOLVED_IN_IMMUNE_RESPONSE	0.116445	0.0366728	4.29217	2.11e-05	0.000111352	2.21884
GOMF_CADHERIN_BINDING_INVOLVED_IN_CELL_CELL_ADHESION	0.129552	0.00842246	4.29213	2.11e-05	0.000111352	2.21865
GOBP_REGULATION_OF_TOLERANCE_INDUCTION	0.137752	0.00680488	4.29202	2.11e-05	0.000111352	2.21822
GOMF_PROTEIN_BINDING_INVOLVED_IN_HETEROTYPIC_CELL_CELL_ADHESION	-0.112824	-0.00566768	-4.29189	2.11e-05	0.000111352	2.21771
GOMF_STRUCTURAL_MOLECULE_ACTIVITY_CONFERRING_ELASTICITY	-0.141024	-0.0112531	-4.29111	2.12e-05	0.000111644	2.21451
GOBP_POSITIVE_REGULATION_OF_LEUKOCYTE_MEDIATED_IMMUNITY	0.105062	-0.00234928	4.28965	2.13e-05	0.000112269	2.20851
GOMF_G_PROTEIN_COUPLED_CHEMOATTRACTANT_RECEPTOR_ACTIVITY	0.144033	0.0057655	4.28788	2.15e-05	0.000112957	2.20129
GOMF_SECONDARY_ACTIVE_MONOCARBOXYLATE_TRANSMEMBRANE_TRANSPORTER_ACTIVITY	-0.116821	0.0294751	-4.28709	2.16e-05	0.000113187	2.19804
GOCC_NUCLEOCYTOPLASMIC_TRANSPORT_COMPLEX	-0.163655	-0.0186209	-4.28664	2.16e-05	0.000113303	2.1962
GOMF_CYTOKINE_RECEPTOR_ACTIVITY	0.106131	0.00626707	4.28474	2.18e-05	0.000113972	2.18846
GOBP_REGULATION_OF_MRNA_PROCESSING	-0.102864	-0.012444	-4.28134	2.21e-05	0.000115397	2.17456
GOBP_REGULATION_OF_TRANSCRIPTION_INVOLVED_IN_G1_S_TRANSITION_OF_MITOTIC_CELL_CYCLE	-0.10328	-0.0283928	-4.28096	2.21e-05	0.000115499	2.173
GOBP_REGULATION_OF_NEUTROPHIL_CHEMOTAXIS	0.102864	0.00487756	4.27282	2.29e-05	0.000119183	2.13982
GOMF_GLUTATHIONE_PEROXIDASE_ACTIVITY	0.107528	-0.00243566	4.27023	2.32e-05	0.000120415	2.12927
GOBP_CELL_CELL_ADHESION_MEDIATED_BY_INTEGRIN	0.128493	-0.00377223	4.26983	2.32e-05	0.000120459	2.12761
GOBP_DNA_REPLICATION_INITIATION	-0.146518	-0.0185777	-4.26304	2.39e-05	0.000123764	2.09999
GOBP_NEGATIVE_REGULATION_OF_LEUKOCYTE_CHEMOTAXIS	0.120717	0.00287895	4.25275	2.5e-05	0.000128795	2.05818
GOMF_CHEMOKINE_BINDING	0.127803	0.00219742	4.25028	2.53e-05	0.000129877	2.04815
GOBP_MICROTUBULE_BUNDLE_FORMATION	0.107917	-0.00570445	4.24444	2.59e-05	0.000132277	2.02448
GOCC_CYTOPLASMIC_STRESS_GRANULE	-0.101117	-0.0119939	-4.24287	2.61e-05	0.000133068	2.01816
GOBP_NUCLEAR_TRANSCRIBED_MRNA_CATABOLIC_PROCESS	-0.100917	-0.015144	-4.24226	2.62e-05	0.000133317	2.01569
GOBP_REGULATION_OF_RNA_BINDING	-0.131187	-0.0200507	-4.23865	2.66e-05	0.000135306	2.00106
GOMF_VERY_LONG_CHAIN_FATTY_ACID_COA_LIGASE_ACTIVITY	0.112043	-0.00645736	4.23476	2.7e-05	0.000137172	1.98534
GOBP_REGULATION_OF_CELL_CELL_ADHESION_MEDIATED_BY_INTEGRIN	0.14199	0.00387551	4.22908	2.77e-05	0.000140244	1.9624
GOMF_ACETYLCHOLINE_RECEPTOR_BINDING	-0.104128	0.00540532	-4.22792	2.78e-05	0.000140625	1.95772
GOBP_REGULATION_OF_GTP_BINDING	-0.102891	-0.0103659	-4.22	2.88e-05	0.00014494	1.92579
GOMF_MICROTUBULE_PLUS_END_BINDING	-0.108945	-0.0251534	-4.21952	2.89e-05	0.000145133	1.92383
GOBP_NUCLEAR_TRANSCRIBED_MRNA_CATABOLIC_PROCESS_DEADENYLATION_DEPENDENT_DECAY	-0.101908	-0.0127052	-4.21493	2.94e-05	0.000147901	1.90538
GOBP_NEGATIVE_REGULATION_OF_LONG_TERM_SYNAPTIC_POTENTIATION	-0.116492	-0.0218817	-4.20947	3.01e-05	0.000151173	1.88342
GOCC_LUMENAL_SIDE_OF_ENDOPLASMIC_RETICULUM_MEMBRANE	0.149555	0.00344413	4.20076	3.13e-05	0.000156325	1.84844
GOBP_REGULATION_OF_CILIUM_DEPENDENT_CELL_MOTILITY	0.10004	0.0232591	4.19452	3.21e-05	0.000160069	1.82342
GOBP_NUCLEOLUS_ORGANIZATION	-0.124896	-0.0363106	-4.19035	3.27e-05	0.000162567	1.80671
GOBP_REGULATION_OF_T_HELPER_1_CELL_DIFFERENTIATION	0.132963	-0.00854422	4.19019	3.27e-05	0.000162567	1.8061
GOBP_ACTIVATION_OF_JANUS_KINASE_ACTIVITY	0.117589	0.0133584	4.18166	3.39e-05	0.000167958	1.772
GOBP_CELLULAR_RESPONSE_TO_GLUCAGON_STIMULUS	-0.119033	0.0422815	-4.17989	3.42e-05	0.000168982	1.76491
GOBP_POSITIVE_REGULATION_OF_MYOBLAST_FUSION	0.111893	-0.001121	4.17492	3.49e-05	0.000172338	1.74507
GOBP_LIPOPOLYSACCHARIDE_MEDIATED_SIGNALING_PATHWAY	0.100346	0.00336017	4.17027	3.56e-05	0.000175515	1.72655
GOBP_REGULATION_OF_B_CELL_PROLIFERATION	0.104668	-0.00607255	4.16564	3.63e-05	0.000177968	1.70809
GOBP_NEUTROPHIL_MEDIATED_KILLING_OF_SYMBIONT_CELL	0.112724	0.00837595	4.16562	3.63e-05	0.000177968	1.70801
GOCC_RNAI_EFFECTOR_COMPLEX	-0.133462	-0.0192751	-4.16476	3.65e-05	0.000178485	1.70461
GOBP_BRONCHUS_DEVELOPMENT	0.116656	-0.00695698	4.16202	3.69e-05	0.000180043	1.69371
GOBP_REGULATION_OF_MICROVILLUS_ORGANIZATION	0.116999	-0.000171568	4.16166	3.69e-05	0.000180122	1.69228
GOBP_MRNA_PROCESSING	-0.103079	-0.01678	-4.16157	3.7e-05	0.000180122	1.69193
GOBP_FACIAL_NERVE_MORPHOGENESIS	-0.113608	-0.00846145	-4.15952	3.73e-05	0.000181304	1.68375
GOBP_NEGATIVE_REGULATION_OF_REGULATED_SECRETORY_PATHWAY	0.11066	0.00130547	4.14814	3.91e-05	0.000188741	1.63858
GOBP_GLIAL_CELL_FATE_COMMITMENT	0.114975	0.0332603	4.14015	4.05e-05	0.000194223	1.60694
GOBP_CHROMOSOME_SEGREGATION	-0.101656	-0.0170065	-4.14	4.05e-05	0.000194223	1.60633
GOBP_ANTIMICROBIAL_HUMORAL_RESPONSE	0.110174	0.0299647	4.13642	4.11e-05	0.000196329	1.5922
GOBP_OLIGOSACCHARIDE_LIPID_INTERMEDIATE_BIOSYNTHETIC_PROCESS	0.12926	-0.0126818	4.13315	4.17e-05	0.000198487	1.57928
GOMF_PROTEIN_SERINE_THREONINE_PHOSPHATASE_INHIBITOR_ACTIVITY	-0.111771	-0.00632701	-4.13174	4.19e-05	0.000199384	1.57371
GOCC_CONDENSED_CHROMOSOME	-0.102747	-0.0172689	-4.12734	4.27e-05	0.000202257	1.55632
GOBP_NEGATIVE_REGULATION_OF_T_CELL_RECEPTOR_SIGNALING_PATHWAY	0.100687	-0.00738049	4.12129	4.38e-05	0.000206592	1.53247
GOMF_ALDITOL_NADPPLUS_1_OXIDOREDUCTASE_ACTIVITY	0.132475	-0.0103292	4.11761	4.45e-05	0.00020937	1.51797
GOBP_REGULATION_OF_INOSITOL_PHOSPHATE_BIOSYNTHETIC_PROCESS	0.121527	0.0233605	4.11289	4.54e-05	0.000213256	1.49942
GOMF_POLYPEPTIDE_N_ACETYLGALACTOSAMINYLTRANSFERASE_ACTIVITY	0.101365	-0.00493372	4.10606	4.67e-05	0.000218536	1.47256
GOCC_MRNA_CLEAVAGE_FACTOR_COMPLEX	-0.128507	-0.0234322	-4.10497	4.69e-05	0.000219232	1.46827
GOMF_RNA_POLYMERASE_II_CTD_HEPTAPEPTIDE_REPEAT_KINASE_ACTIVITY	-0.131341	-0.0210067	-4.10134	4.76e-05	0.000222121	1.45405
GOBP_MITOCHONDRIAL_FUSION	-0.109777	-0.0210094	-4.09927	4.8e-05	0.000223836	1.44593
GOCC_MKS_COMPLEX	0.154685	-0.0185145	4.09386	4.91e-05	0.000227758	1.42471
GOCC_CHROMOSOME_CENTROMERIC_REGION	-0.116333	-0.0190947	-4.09024	4.99e-05	0.000230752	1.41054
GOMF_METHYLATED_HISTONE_BINDING	-0.101254	-0.0192074	-4.08957	5e-05	0.00023108	1.40791
GOBP_PYRIMIDINE_RIBONUCLEOSIDE_TRIPHOSPHATE_BIOSYNTHETIC_PROCESS	0.108383	-0.0180093	4.08933	5.01e-05	0.000231148	1.40699
GOBP_NEGATIVE_REGULATION_OF_SMOOTH_MUSCLE_CONTRACTION	0.108253	0.00701473	4.08382	5.12e-05	0.00023587	1.38547
GOMF_DYNEIN_COMPLEX_BINDING	-0.106386	-0.0120113	-4.08124	5.18e-05	0.000238095	1.37539
GOBP_SHORT_TERM_MEMORY	-0.109177	0.0117719	-4.08047	5.2e-05	0.000238681	1.37239
GOBP_REGULATION_OF_PROTEIN_LIPIDATION	-0.107874	-0.00893545	-4.07253	5.37e-05	0.000245918	1.34139
GOBP_COMPLEMENT_ACTIVATION	0.108649	0.0194112	4.0725	5.37e-05	0.000245918	1.34127
GOBP_TOLL_LIKE_RECEPTOR_3_SIGNALING_PATHWAY	0.106758	0.00399188	4.07056	5.42e-05	0.000247574	1.33371
GOBP_REGULATION_OF_TRANSFORMING_GROWTH_FACTOR_BETA1_PRODUCTION	0.111568	0.00889382	4.06854	5.46e-05	0.000249314	1.32587
GOCC_IMMUNOLOGICAL_SYNAPSE	0.114039	-0.00339648	4.06768	5.48e-05	0.000250039	1.32252
GOCC_SPINDLE_POLE_CENTROSOME	-0.124173	-0.031022	-4.06021	5.65e-05	0.000257396	1.29346
GOBP_ENDOPLASMIC_RETICULUM_TUBULAR_NETWORK_ORGANIZATION	-0.126133	-0.00832849	-4.05966	5.67e-05	0.000257811	1.29132
GOBP_MITOCHONDRIAL_TRNA_PROCESSING	-0.138741	-0.0311298	-4.05675	5.73e-05	0.000260407	1.28003
GOBP_NEGATIVE_REGULATION_OF_PROTEIN_AUTOPHOSPHORYLATION	0.101352	0.0173317	4.05152	5.86e-05	0.000265574	1.25975
GOBP_CELL_CYCLE_DNA_REPLICATION	-0.13714	-0.0185759	-4.04844	5.94e-05	0.000268624	1.24779
GOCC_INFLAMMASOME_COMPLEX	0.11904	-0.00214359	4.04776	5.95e-05	0.000269196	1.24517
GOCC_ASTER	-0.108969	-0.0208406	-4.04306	6.07e-05	0.00027426	1.22694
GOBP_POSITIVE_REGULATION_OF_CHROMATIN_BINDING	-0.106406	-0.0204264	-4.04006	6.15e-05	0.000276975	1.21536
GOMF_NUCLEOSOME_BINDING	-0.111614	-0.0197195	-4.03512	6.27e-05	0.000281925	1.19627
GOBP_EOSINOPHIL_MIGRATION	0.122658	0.00329919	4.03065	6.39e-05	0.000285649	1.17899
GOBP_POSITIVE_REGULATION_OF_LYMPHOCYTE_CHEMOTAXIS	0.103473	-0.0084165	4.02268	6.6e-05	0.000293811	1.14828
GOMF_PATTERN_RECOGNITION_RECEPTOR_ACTIVITY	0.119249	0.00761022	4.01868	6.71e-05	0.000298097	1.13287
GOBP_PROTEIN_POLYGLUTAMYLATION	0.122827	0.000744227	4.01718	6.75e-05	0.000299546	1.1271
GOBP_SALIVA_SECRETION	0.122756	0.0474994	4.01622	6.78e-05	0.000300399	1.12339
GOBP_RESPONSE_TO_INTERFERON_ALPHA	-0.125486	-0.00934837	-4.01617	6.78e-05	0.000300399	1.1232
GOMF_OLIGOSACCHARIDE_BINDING	0.124017	0.0297162	4.01188	6.9e-05	0.000305134	1.10673
GOBP_AV_NODE_CELL_TO_BUNDLE_OF_HIS_CELL_SIGNALING	0.11847	0.0109336	4.00912	6.98e-05	0.000308407	1.09613
GOBP_REGULATION_OF_SPINDLE_ORGANIZATION	-0.102284	-0.0257348	-4.00012	7.24e-05	0.000318747	1.06162
GOBP_OXALATE_TRANSPORT	0.119286	0.0130245	3.99749	7.32e-05	0.000321568	1.05154
GOBP_MITOTIC_DNA_REPLICATION	-0.153615	-0.0199753	-3.9946	7.41e-05	0.000324977	1.04046
GOBP_UBIQUINONE_METABOLIC_PROCESS	0.111071	-0.0158049	3.99422	7.42e-05	0.000325139	1.039
GOBP_REGULATION_OF_MONOCYTE_DIFFERENTIATION	0.101718	0.00981596	3.99015	7.55e-05	0.000329655	1.02344
GOBP_REGULATION_OF_DNA_DEPENDENT_DNA_REPLICATION	-0.128212	-0.0167236	-3.98139	7.82e-05	0.00034078	0.989989
GOBP_POSITIVE_REGULATION_OF_TRIGLYCERIDE_LIPASE_ACTIVITY	0.115163	0.0308389	3.97589	8e-05	0.000347154	0.969038
GOMF_TRANSFERRIN_RECEPTOR_BINDING	-0.101047	-0.00881865	-3.96609	8.32e-05	0.000359901	0.931731
GOBP_REGULATION_OF_T_CELL_CHEMOTAXIS	0.100778	-0.00823015	3.96067	8.51e-05	0.000367211	0.911148
GOBP_CENTROSOME_SEPARATION	-0.127758	-0.026632	-3.95874	8.58e-05	0.000369859	0.903836
GOBP_T_HELPER_17_CELL_LINEAGE_COMMITMENT	0.142711	-0.00534627	3.9535	8.76e-05	0.000377079	0.883936
GOBP_NEGATIVE_REGULATION_OF_METAPHASE_ANAPHASE_TRANSITION_OF_CELL_CYCLE	-0.115655	-0.0149342	-3.95328	8.77e-05	0.000377079	0.883095
GOBP_MYELOID_DENDRITIC_CELL_DIFFERENTIATION	0.100142	-0.0125678	3.94535	9.06e-05	0.000387034	0.853081
GOBP_INFLAMMATORY_RESPONSE_TO_WOUNDING	0.111252	-0.00471248	3.94171	9.19e-05	0.000391772	0.839343
GOBP_DOUBLE_STRAND_BREAK_REPAIR_VIA_BREAK_INDUCED_REPLICATION	-0.158649	-0.029788	-3.93449	9.46e-05	0.000402872	0.812083
GOBP_LEUKOCYTE_TETHERING_OR_ROLLING	0.101459	-0.000462536	3.93011	9.63e-05	0.000409556	0.795543
GOBP_REGULATION_OF_NUCLEAR_CELL_CYCLE_DNA_REPLICATION	-0.109376	-0.0113044	-3.92258	9.93e-05	0.000420591	0.767191
GOBP_POSITIVE_REGULATION_OF_TOLERANCE_INDUCTION	0.135824	0.00675933	3.92258	9.93e-05	0.000420591	0.767189
GOMF_DNA_APURINIC_OR_APYRIMIDINIC_SITE_ENDONUCLEASE_ACTIVITY	-0.124991	-0.0332754	-3.91727	0.000101435	0.000428329	0.747237
GOBP_OUTER_DYNEIN_ARM_ASSEMBLY	0.13625	-0.000225284	3.91614	0.000101896	0.000430006	0.743005
GOBP_ANTIBACTERIAL_HUMORAL_RESPONSE	0.118064	0.0337653	3.90342	0.000107246	0.000450596	0.695281
GOBP_DNA_STRAND_ELONGATION_INVOLVED_IN_DNA_REPLICATION	-0.158018	-0.02395	-3.8993	0.000109035	0.000456678	0.679859
GOCC_OUTER_KINETOCHORE	-0.152948	-0.0143408	-3.89471	0.000111058	0.000464858	0.662725
GOBP_NAIL_DEVELOPMENT	0.101292	0.0345286	3.89256	0.000112021	0.000468011	0.654678
GOBP_ALDITOL_PHOSPHATE_METABOLIC_PROCESS	0.104175	0.0066516	3.8921	0.000112227	0.000468581	0.652963
GOBP_G_PROTEIN_COUPLED_RECEPTOR_SIGNALING_PATHWAY_INVOLVED_IN_HEART_PROCESS	0.116764	0.00578197	3.88151	0.000117086	0.000484936	0.613459
GOCC_CYTOSOLIC_SMALL_RIBOSOMAL_SUBUNIT	0.147816	-0.0137862	3.87204	0.000121598	0.000500856	0.578229
GOBP_ESTABLISHMENT_OF_LYMPHOCYTE_POLARITY	0.115214	-0.00388199	3.86706	0.000124036	0.000509977	0.559739
GOBP_GOLGI_LOCALIZATION	-0.107497	-0.0140592	-3.86704	0.000124047	0.000509977	0.559658
GOBP_DNA_UNWINDING_INVOLVED_IN_DNA_REPLICATION	-0.143787	-0.0211394	-3.86598	0.000124568	0.000511493	0.555751
GOBP_ATTACHMENT_OF_SPINDLE_MICROTUBULES_TO_KINETOCHORE	-0.126316	-0.0140272	-3.86253	0.000126294	0.00051668	0.542931
GOMF_CCR_CHEMOKINE_RECEPTOR_BINDING	0.120823	-0.00393351	3.86159	0.000126765	0.000517973	0.539464
GOBP_OXYGEN_TRANSPORT	0.108314	0.0459093	3.85777	0.000128706	0.000524624	0.525312
GOBP_REGULATION_OF_LAMELLIPODIUM_MORPHOGENESIS	0.10639	0.00405999	3.85653	0.000129344	0.000526583	0.520707
GOBP_NUCLEOLAR_LARGE_RRNA_TRANSCRIPTION_BY_RNA_POLYMERASE_I	-0.124288	-0.0302253	-3.85376	0.000130776	0.000531443	0.510454
GOMF_TRANSLATION_INITIATION_FACTOR_BINDING	-0.103576	-0.019472	-3.84434	0.000135754	0.000548672	0.475675
GOMF_LYS48_SPECIFIC_DEUBIQUITINASE_ACTIVITY	-0.124242	-0.018567	-3.84083	0.000137655	0.000554682	0.462727
GOBP_BASEMENT_MEMBRANE_ASSEMBLY	-0.103312	-0.0116289	-3.83568	0.000140492	0.000564764	0.443742
GOBP_SYNAPSE_PRUNING	0.144888	0.00925569	3.83008	0.00014364	0.00057637	0.423115
GOBP_POSITIVE_REGULATION_OF_T_CELL_APOPTOTIC_PROCESS	0.106876	0.0198603	3.82271	0.000147883	0.000591255	0.396032
GOCC_SMALL_SUBUNIT_PROCESSOME	-0.121069	-0.035132	-3.82256	0.000147968	0.000591255	0.395495
GOBP_MRNA_3_END_PROCESSING	-0.103769	-0.0171754	-3.81787	0.000150732	0.00060015	0.378276
GOBP_T_CELL_CHEMOTAXIS	0.103165	-0.00503315	3.80931	0.000155897	0.000617409	0.346938
GOBP_DEOXYRIBONUCLEOSIDE_MONOPHOSPHATE_CATABOLIC_PROCESS	0.103914	0.00213521	3.80609	0.000157886	0.000624547	0.335148
GOCC_DNA_REPLICATION_PREINITIATION_COMPLEX	-0.160472	-0.0161323	-3.80291	0.000159875	0.000629437	0.323508
GOBP_SPLICEOSOMAL_SNRNP_ASSEMBLY	-0.119667	-0.0312428	-3.80158	0.000160707	0.000632339	0.318684
GOCC_PRERIBOSOME_LARGE_SUBUNIT_PRECURSOR	-0.13069	-0.0393251	-3.79851	0.000162656	0.000637759	0.307475
GOBP_PROTEIN_K63_LINKED_DEUBIQUITINATION	-0.100373	-0.01549	-3.79745	0.000163335	0.000640047	0.303599
GOBP_DNA_DEPENDENT_DNA_REPLICATION	-0.112846	-0.0191167	-3.78983	0.000168289	0.000656531	0.275822
GOBP_NEGATIVE_REGULATION_OF_TRANSLATIONAL_INITIATION	-0.1067	-0.0201462	-3.78808	0.000169447	0.000659748	0.269449
GOBP_NEGATIVE_REGULATION_OF_T_CELL_CYTOKINE_PRODUCTION	0.127864	0.022699	3.78223	0.000173368	0.000673148	0.248183
GOCC_CHROMOSOMAL_REGION	-0.103786	-0.0189417	-3.7822	0.000173391	0.000673148	0.248062
GOBP_NEGATIVE_REGULATION_OF_B_CELL_PROLIFERATION	0.121929	-9.03e-05	3.77172	0.00018064	0.000697648	0.210004
GOMF_ARYLSULFATASE_ACTIVITY	0.105123	0.0119671	3.76709	0.000183931	0.000707502	0.193229
GOBP_VOCALIZATION_BEHAVIOR	-0.100058	0.0266687	-3.76292	0.000186939	0.000718659	0.178161
GOBP_POSITIVE_REGULATION_OF_HISTONE_H3_K4_METHYLATION	-0.106221	-0.0135581	-3.76005	0.00018904	0.000725486	0.16778
GOMF_3_5_DNA_HELICASE_ACTIVITY	-0.128323	-0.0337017	-3.75975	0.000189262	0.00072592	0.166693
GOMF_HISTONE_METHYLTRANSFERASE_ACTIVITY_H3_K9_SPECIFIC	-0.113144	-0.0222579	-3.75107	0.000195755	0.000749106	0.135369
GOBP_REGULATION_OF_SISTER_CHROMATID_COHESION	-0.104992	-0.0245668	-3.74377	0.000201379	0.000767993	0.109072
GOBP_MEIOTIC_SPINDLE_ORGANIZATION	-0.119111	-0.0215087	-3.73534	0.000208065	0.000788551	0.0787508
GOBP_ENDONUCLEOLYTIC_CLEAVAGE_INVOLVED_IN_RRNA_PROCESSING	-0.127634	-0.0299647	-3.72998	0.000212428	0.000802813	0.0594924
GOBP_PROTEIN_LOCALIZATION_TO_CHROMOSOME_CENTROMERIC_REGION	-0.125865	-0.0128733	-3.72669	0.000215143	0.000812614	0.0477087
GOBP_REGULATION_OF_COMPLEMENT_ACTIVATION	0.104906	0.00775313	3.72441	0.000217049	0.000818427	0.0395255
GOMF_LYSINE_ACETYLATED_HISTONE_BINDING	-0.102176	-0.0128092	-3.72276	0.000218435	0.000823192	0.0336169
GOCC_NUCLEAR_REPLICATION_FORK	-0.125344	-0.0270922	-3.72077	0.000220115	0.000829054	0.0265107
GOBP_REGULATION_OF_MITOTIC_SISTER_CHROMATID_SEGREGATION	-0.108383	-0.0192349	-3.71978	0.000220954	0.00083128	0.0229798
GOBP_DENDRITIC_CELL_APOPTOTIC_PROCESS	0.138128	0.00477914	3.71613	0.000224088	0.000840969	0.00991785
GOCC_PRERIBOSOME	-0.11981	-0.0329681	-3.71605	0.000224158	0.000840969	0.00962656
GOBP_RESPIRATORY_BURST	0.102548	0.0039944	3.70874	0.000230559	0.000863686	-0.0164897
GOMF_STRUCTURAL_CONSTITUENT_OF_NUCLEAR_PORE	-0.112529	-0.0190762	-3.70869	0.0002306	0.000863686	-0.0166532
GOBP_SHORT_CHAIN_FATTY_ACID_METABOLIC_PROCESS	0.100045	-0.00358069	3.69374	0.000244231	0.000910153	-0.0699001
GOCC_PLATELET_DENSE_TUBULAR_NETWORK	0.103468	-0.00827458	3.69182	0.000246026	0.000915317	-0.076691
GOBP_EPITHELIAL_TO_MESENCHYMAL_TRANSITION_INVOLVED_IN_ENDOCARDIAL_CUSHION_FORMATION	0.106179	-0.00228992	3.68481	0.00025272	0.000937615	-0.101572
GOMF_MINUS_END_DIRECTED_MICROTUBULE_MOTOR_ACTIVITY	0.125893	-0.00249948	3.68466	0.000252868	0.000937642	-0.102112
GOBP_POSITIVE_REGULATION_OF_DOUBLE_STRAND_BREAK_REPAIR_VIA_NONHOMOLOGOUS_END_JOINING	-0.103397	-0.0286376	-3.68343	0.000254065	0.00094074	-0.106488
GOBP_POSITIVE_REGULATION_OF_ANTIGEN_RECEPTOR_MEDIATED_SIGNALING_PATHWAY	0.102715	-0.00611317	3.68336	0.000254125	0.00094074	-0.106708
GOBP_NEGATIVE_REGULATION_OF_INTERLEUKIN_12_PRODUCTION	0.131431	-0.00554016	3.67904	0.000258365	0.000955079	-0.122041
GOMF_SINGLE_STRANDED_DNA_BINDING	-0.102475	-0.0239358	-3.67826	0.000259129	0.000957147	-0.124777
GOBP_MORPHOGENESIS_OF_AN_EPITHELIAL_BUD	0.102658	0.016655	3.66628	0.000271255	0.000996986	-0.167145
GOBP_CD4_POSITIVE_ALPHA_BETA_T_CELL_CYTOKINE_PRODUCTION	0.102154	0.0218343	3.65963	0.000278205	0.00101973	-0.190573
GOBP_DNA_DOUBLE_STRAND_BREAK_PROCESSING	-0.112532	-0.0151221	-3.6488	0.000289894	0.00106025	-0.228683
GOCC_U2_TYPE_SPLICEOSOMAL_COMPLEX	-0.111212	-0.0274847	-3.64664	0.000292273	0.00106604	-0.236248
GOBP_REGULATION_OF_DENDRITIC_CELL_CHEMOTAXIS	0.126528	0.000886716	3.63262	0.00030821	0.00111566	-0.285382
GOBP_POSITIVE_REGULATION_OF_NITRIC_OXIDE_SYNTHASE_BIOSYNTHETIC_PROCESS	0.109125	-0.00736102	3.63211	0.000308805	0.00111721	-0.287167
GOBP_UDP_N_ACETYLGLUCOSAMINE_METABOLIC_PROCESS	0.112621	-0.00851502	3.62158	0.00032133	0.00115441	-0.32395
GOBP_LEUKOCYTE_MIGRATION_INVOLVED_IN_INFLAMMATORY_RESPONSE	0.119696	0.0107207	3.61432	0.000330243	0.00118262	-0.349252
GOBP_ATTACHMENT_OF_MITOTIC_SPINDLE_MICROTUBULES_TO_KINETOCHORE	-0.125101	-0.0210889	-3.61217	0.000332929	0.00118918	-0.356745
GOBP_NEGATIVE_REGULATION_OF_INTERFERON_GAMMA_PRODUCTION	0.102635	0.0089464	3.6115	0.000333761	0.00119139	-0.359051
GOBP_PYROPTOSIS	0.103429	-0.00473231	3.61097	0.000334438	0.00119317	-0.360925
GOCC_LUMENAL_SIDE_OF_MEMBRANE	0.11693	0.000932902	3.60569	0.000341141	0.00121127	-0.379271
GOMF_MHC_CLASS_I_RECEPTOR_ACTIVITY	0.138111	0.00246602	3.60164	0.000346369	0.00122854	-0.393331
GOMF_NUCLEAR_EXPORT_SIGNAL_RECEPTOR_ACTIVITY	-0.119556	-0.0344101	-3.59982	0.000348744	0.00123565	-0.39965
GOBP_NUCLEAR_PORE_ORGANIZATION	-0.136678	-0.016414	-3.5879	0.000364669	0.00128055	-0.440914
GOCC_DNA_POLYMERASE_COMPLEX	-0.117504	-0.0315283	-3.58629	0.000366873	0.00128627	-0.446482
GOBP_BLASTOCYST_GROWTH	-0.110407	-0.0179249	-3.58411	0.000369874	0.00129611	-0.454008
GOBP_POSITIVE_REGULATION_OF_INTERLEUKIN_17_PRODUCTION	0.101546	0.0113668	3.58355	0.00037065	0.00129815	-0.455942
GOBP_NITRIC_OXIDE_SYNTHASE_BIOSYNTHETIC_PROCESS	0.100118	-0.00469408	3.58259	0.000371979	0.00130144	-0.459251
GOMF_NUCLEOSOMAL_DNA_BINDING	-0.105663	-0.0211583	-3.57339	0.00038498	0.00133974	-0.490983
GOBP_PROTEIN_LOCALIZATION_TO_CONDENSED_CHROMOSOME	-0.125393	-0.0147363	-3.56	0.000404655	0.00139894	-0.537004
GOBP_NEGATIVE_REGULATION_OF_HISTONE_H3_K9_METHYLATION	-0.10534	-0.0161266	-3.55814	0.00040746	0.00140574	-0.543382
GOCC_DYNEIN_AXONEMAL_PARTICLE	0.133882	-0.0321089	3.55406	0.000413682	0.00142416	-0.55737
GOCC_ENDOPLASMIC_RETICULUM_CHAPERONE_COMPLEX	0.118875	-0.00299754	3.54493	0.000427923	0.00146952	-0.588603
GOMF_IMMUNOGLOBULIN_RECEPTOR_BINDING	0.145795	-0.0126478	3.54419	0.000429111	0.00147225	-0.591162
GOBP_NUCLEAR_PORE_COMPLEX_ASSEMBLY	-0.134569	-0.0170819	-3.53854	0.000438171	0.00149627	-0.610437
GOMF_FOUR_WAY_JUNCTION_DNA_BINDING	-0.124054	-0.0217018	-3.51207	0.000483081	0.00163709	-0.700409
GOCC_ATAC_COMPLEX	-0.111275	-0.025402	-3.50634	0.000493358	0.0016677	-0.719808
GOBP_NK_T_CELL_ACTIVATION	0.100032	-0.00794361	3.50262	0.000500137	0.00168636	-0.732383
GOCC_EXTRINSIC_COMPONENT_OF_MITOCHONDRIAL_INNER_MEMBRANE	0.104865	0.0037212	3.49509	0.000514128	0.0017275	-0.757802
GOBP_POSITIVE_REGULATION_OF_REGULATORY_T_CELL_DIFFERENTIATION	0.10667	0.00559826	3.48932	0.000525093	0.0017581	-0.777239
GOCC_CONDENSED_CHROMOSOME_CENTROMERIC_REGION	-0.100485	-0.0203584	-3.48823	0.000527202	0.0017634	-0.780929
GOBP_POSITIVE_REGULATION_OF_TRANSCRIPTION_BY_RNA_POLYMERASE_III	-0.107413	-0.0261789	-3.48369	0.000536005	0.00178748	-0.796179
GOMF_ENOYL_COA_HYDRATASE_ACTIVITY	0.105341	-0.00579533	3.48178	0.000539753	0.0017964	-0.802595
GOMF_OXIDOREDUCTASE_ACTIVITY_ACTING_ON_NAD_P_H_QUINONE_OR_SIMILAR_COMPOUND_AS_ACCEPTOR	0.102694	-0.0242098	3.47907	0.000545125	0.00181158	-0.811714
GOBP_POSITIVE_REGULATION_OF_NEUROINFLAMMATORY_RESPONSE	0.107164	0.00236036	3.45165	0.000602247	0.00198564	-0.903413
GOCC_MICROFIBRIL	-0.111795	0.00423233	-3.45104	0.000603574	0.00198903	-0.905437
GOMF_NUCLEOCYTOPLASMIC_CARRIER_ACTIVITY	-0.107598	-0.0239494	-3.43833	0.00063197	0.00206936	-0.947711
GOMF_METALLOENDOPEPTIDASE_INHIBITOR_ACTIVITY	-0.102096	0.00538539	-3.43651	0.000636129	0.00208196	-0.953741
GOBP_REGULATION_OF_NEUTROPHIL_ACTIVATION	0.131143	0.00918698	3.43278	0.000644751	0.00210196	-0.966116
GOMF_OXIDOREDUCTASE_ACTIVITY_ACTING_ON_A_SULFUR_GROUP_OF_DONORS_NAD_P_AS_ACCEPTOR	0.105823	-0.0173693	3.42446	0.000664384	0.00215755	-0.993682
GOBP_REGULATION_OF_ATTACHMENT_OF_SPINDLE_MICROTUBULES_TO_KINETOCHORE	-0.128326	-0.0183983	-3.41772	0.000680683	0.00220508	-1.01595
GOCC_CYTOSOLIC_RIBOSOME	0.131249	-0.0153835	3.41287	0.000692642	0.00223415	-1.03195
GOBP_ANTIGEN_PROCESSING_AND_PRESENTATION_OF_PEPTIDE_ANTIGEN_VIA_MHC_CLASS_I	0.109523	-0.000298464	3.3987	0.000728698	0.0023324	-1.07854
GOCC_REPLICATION_FORK	-0.10843	-0.025196	-3.3874	0.000758711	0.00241582	-1.11559
GOBP_NEGATIVE_REGULATION_OF_MACROPHAGE_ACTIVATION	0.105693	0.0102125	3.38597	0.000762593	0.00242587	-1.12027
GOCC_CUL4A_RING_E3_UBIQUITIN_LIGASE_COMPLEX	-0.105253	-0.025951	-3.38408	0.00076775	0.0024398	-1.12645
GOMF_PEPTIDE_ANTIGEN_BINDING	0.122988	0.00759872	3.37504	0.000792839	0.00250897	-1.15595
GOMF_HISTONE_KINASE_ACTIVITY	-0.100193	-0.019191	-3.36296	0.000827583	0.00259794	-1.19528
GOCC_REPLISOME	-0.120678	-0.0358422	-3.36054	0.000834725	0.00261678	-1.20316
GOMF_MHC_PROTEIN_BINDING	0.11109	-0.0139664	3.35186	0.000860769	0.0026896	-1.23132
GOMF_MANNOSIDASE_ACTIVITY	0.102648	-0.00939797	3.34408	0.000884746	0.0027582	-1.25649
GOMF_MISMATCHED_DNA_BINDING	-0.102544	-0.0390278	-3.34407	0.000884784	0.0027582	-1.25653
GOBP_NEUTROPHIL_EXTRAVASATION	0.101785	0.0051016	3.3394	0.000899464	0.00279615	-1.27161
GOBP_RESPONSE_TO_PROTOZOAN	0.111172	-0.00506204	3.33057	0.000927857	0.00287507	-1.30007
GOBP_CENTROMERE_COMPLEX_ASSEMBLY	-0.116089	-0.0119009	-3.32491	0.000946517	0.00292476	-1.3183
GOCC_U2_TYPE_CATALYTIC_STEP_2_SPLICEOSOME	-0.110504	-0.0274207	-3.28978	0.00107019	0.00325275	-1.43064
GOBP_FORMATION_OF_EXTRACHROMOSOMAL_CIRCULAR_DNA	-0.108811	-0.0322487	-3.2786	0.00111263	0.00336807	-1.46618
GOBP_REGULATION_OF_TRANSCRIPTION_OF_NUCLEOLAR_LARGE_RRNA_BY_RNA_POLYMERASE_I	-0.105428	-0.0269418	-3.27432	0.00112925	0.00341067	-1.47973
GOBP_REGULATION_OF_DNA_DIRECTED_DNA_POLYMERASE_ACTIVITY	-0.125438	-0.0164043	-3.26211	0.00117802	0.0035404	-1.51835
GOBP_DNA_STRAND_ELONGATION	-0.101005	-0.0249878	-3.2536	0.00121312	0.00363229	-1.54516
GOBP_RNA_SURVEILLANCE	-0.102742	-0.0286351	-3.25352	0.00121348	0.00363229	-1.54543
GOBP_T_CELL_TOLERANCE_INDUCTION	0.10632	0.00809911	3.25049	0.00122623	0.00366717	-1.55497
GOCC_CELL_TRAILING_EDGE	0.10553	-0.00183834	3.24691	0.00124145	0.00370443	-1.56623
GOBP_ANTIGEN_PROCESSING_AND_PRESENTATION_OF_ENDOGENOUS_PEPTIDE_ANTIGEN	0.126844	-0.000155683	3.23623	0.00128786	0.00381541	-1.59971
GOBP_MATURATION_OF_SSU_RRNA_FROM_TRICISTRONIC_RRNA_TRANSCRIPT_SSU_RRNA_5_8S_RRNA_LSU_RRNA	-0.102356	-0.0341458	-3.22355	0.00134508	0.00396069	-1.63936
GOBP_NEGATIVE_REGULATION_OF_DNA_DEPENDENT_DNA_REPLICATION	-0.111454	-0.0263786	-3.21767	0.00137243	0.00402529	-1.65771
GOCC_PRECATALYTIC_SPLICEOSOME	-0.102501	-0.0279229	-3.18902	0.00151305	0.00438771	-1.74657
GOBP_NLS_BEARING_PROTEIN_IMPORT_INTO_NUCLEUS	-0.118194	-0.00681515	-3.16625	0.00163419	0.00468756	-1.81665
GOBP_MITOTIC_DNA_REPLICATION_CHECKPOINT_SIGNALING	-0.114835	-0.0280656	-3.16617	0.00163466	0.00468756	-1.81691
GOMF_G_QUADRUPLEX_DNA_BINDING	-0.10235	-0.0330994	-3.1337	0.001823	0.00515694	-1.91602
GOMF_COMPLEMENT_RECEPTOR_ACTIVITY	0.11945	0.024564	3.12765	0.00186023	0.00525117	-1.93438
GOBP_DNA_REPLICATION_CHECKPOINT_SIGNALING	-0.11078	-0.0261975	-3.11689	0.00192818	0.00541557	-1.96694
GOBP_KINETOCHORE_ORGANIZATION	-0.109029	-0.0131365	-3.10789	0.0019867	0.00556826	-1.99407
GOBP_NADH_REGENERATION	-0.101514	-0.0230832	-3.10032	0.00203727	0.00568855	-2.01687
GOBP_REGULATION_OF_PROTEIN_LOCALIZATION_TO_CHROMOSOME_TELOMERIC_REGION	-0.117704	-0.0183718	-3.08322	0.0021558	0.00598206	-2.06812
GOCC_PRERIBOSOME_SMALL_SUBUNIT_PRECURSOR	-0.107755	-0.0275265	-3.07704	0.00220021	0.00609268	-2.0866
GOBP_MATURATION_OF_LSU_RRNA_FROM_TRICISTRONIC_RRNA_TRANSCRIPT_SSU_RRNA_5_8S_RRNA_LSU_RRNA	-0.102907	-0.0314053	-2.94436	0.00338017	0.00878898	-2.47428
GOBP_IMMUNE_RESPONSE_INHIBITING_SIGNAL_TRANSDUCTION	0.112474	0.0137273	2.93012	0.00353629	0.00912076	-2.5149
GOCC_CYTOSOLIC_LARGE_RIBOSOMAL_SUBUNIT	0.112656	-0.0195281	2.77314	0.00574997	0.013774	-2.95014
GOMF_INHIBITORY_MHC_CLASS_I_RECEPTOR_ACTIVITY	0.119185	-0.00606645	2.64074	0.00851976	0.0193363	-3.29913
GOBP_HYPERSENSITIVITY	0.103625	-0.00792929	2.52813	0.0117605	0.0255976	-3.58289
